# Supplementary material for: Daily Tackling Heath Inequalities: French Child Individual-Level Deprivation Index Development and Validation
Source: Research Square preprint supplement (doi:10.21203/rs.3.rs-754883/v1), 2021-08-06
Supplement: Supplementary file 1 [file 06935cc77efe74dda975ea1e.xlsx]

## Sheet: Sheet1
No_Child	filter_$	Date_of_birth	gender	Date_of_inclusion	Center	Child_Age	Complete_Case	FrenChILD_Index	Health_booklet_missing	Children_health_follow_up_missing	Health_Insurance	Children_unschooling	Housing_conditions	Social_assistance_need	Single_parenthood	Food_insecurity	Surrounding_dismiss	Household_vulnerability	Recent_migration	Non_french_speaking	Number_of_deprivation_domains_affected	Deprivation_in_Health_and_Health_Care	Deprivation_in_Neighborhood_and_built_environment	Deprivation_in_Education	Deprivation_in_Economic_stability	Deprivation_in_Family_Context	Deprivation_in_Social_and_Community_Context	Amount_of_specific_healthcare_indicated_for_deprived_children	free_medical_consultations	social_evaluation_to_gain_access_to_health_insurance	free_medicine_dispensing	home_visit_because_of_unhealthy_housing	physical_accompaniment_in_healthcare	multidisciplinary_care_coordination_meetings	Admission_in_SMUFAH	Date_of_phone_call_for_retest	Lenght_of_follow_up	Health_booklet_still_missing	Children_health_follow_up_still_missing	New_Health_Insurance	Children_still_unschooled	New_Housing_conditions	New_Social_assistance_need	New_Food_insecurity	New_single_parenthood	New_surrounding_dismiss	New_Household_vulnerability	New_Recent_migration	Still_Non_french_speaking
1	Selected	2005-01-09	female	2018-04-05	1	13.2348	1	45	No	No	Incomplete health insurance	No	Unhealthy housing	Needing social assistance	Yes	No	No	Yes	No	No	3	Yes	Yes	No	No	No	Yes	5	Yes	Yes	Yes	Yes	No	Yes	Yes
2	Selected	2008-04-19	female	2018-04-05	1	9.9603	1	35	No	No	Complete health insurance for undocumented migrants	No	Unstable housing (temporary social housing or housed by relatives, slums)	Needing social assistance	No	No	No	No	Yes	Yes	4	Yes	Yes	No	Yes	No	Yes	0	No	No	No	No	No	No	No	2018-10-05	6.01232	No	No	Complete health insurance for undocumented migrants	No	Unstable housing (temporary social housing or housed by relatives, slums)	Needing social assistance	No	Yes	No	Yes	Yes	Yes
3	Selected	2006-05-04	female	2018-04-05	1	11.9206	1	0	No	No	Full Health insurance (including a top-up policy)	No	Stable and healthy housing	Not needing a social assistance	No	No	No	No	No	No	0	No	No	No	No	No	No	0	No	No	No	No	No	No	No
4	Selected	2010-12-29	female	2018-04-05	1	7.26626	1	9	No	No	Complete health insurance for deprived citizens	No	Stable and healthy housing	Not needing a social assistance	Yes	No	No	No	No	No	0	No	No	No	No	No	No	0	No	No	No	No	No	No	No
5	Selected	2014-03-16	male	2018-04-11	1	4.07118	1	2	No	No	Full Health insurance (including a top-up policy)	No	Stable and healthy housing	Not needing a social assistance	No	No	No	No	Yes	No	0	No	No	No	No	No	No	0	No	No	No	No	No	No	No
6	Selected	2012-02-25	male	2018-04-11	1	6.12457	1	59	No	No	No health insurance (even if enrollment in progress or insurance abroad)	No	Unhealthy housing	Needing social assistance without knowing how to get this	Yes	No	No	No	Yes	No	3	Yes	Yes	No	No	No	Yes	4	Yes	Yes	Yes	Yes	No	No	Yes
7	Selected	2011-09-16	male	2018-04-11	1	6.5681	1	20	No	No	Complete health insurance for deprived citizens	No	Stable and healthy housing	Needing social assistance without knowing how to get this	Yes	No	No	No	No	Yes	0	No	No	No	No	No	No	1	No	No	No	Yes	No	No	No	2018-10-11	6.01232	No	No	Complete health insurance for deprived citizens	No	Unhealthy housing	3	No	Yes	No	No	No	Yes
8	Selected	2006-02-12	male	2018-04-11	1	12.1588	1	15	No	No	Complete health insurance for deprived citizens	No	Stable and healthy housing	Needing social assistance	Yes	No	No	Yes	No	No	0	No	No	No	No	No	No	0	No	No	No	No	No	No	No
9	Selected	2014-09-22	male	2018-04-12	1	3.55373	1	15	No	No	Complete health insurance for deprived citizens	No	Stable and healthy housing	Needing social assistance	Yes	No	No	Yes	No	No	1	No	No	No	No	Yes	No	0	No	No	No	No	No	No	No
10	Selected	2015-04-06	female	2018-04-13	1	3.01985	1	9	No	No	Full Health insurance (including a top-up policy)	Yes	Stable and healthy housing	Not needing a social assistance	No	No	No	No	Yes	No	0	No	No	No	No	No	No	0	No	No	No	No	No	No	No
11	Selected	2007-05-10	female	2018-04-13	1	10.9268	1	0	No	No	Full Health insurance (including a top-up policy)	No	Stable and healthy housing	Not needing a social assistance	No	No	No	No	No	No	0	No	No	No	No	No	No	0	No	No	No	No	No	No	No
12	Selected	2006-12-08	female	2018-04-13	1	11.3457	1	0	No	No	Full Health insurance (including a top-up policy)	No	Stable and healthy housing	Not needing a social assistance	No	No	No	No	No	No	0	No	No	No	No	No	No	0	No	No	No	No	No	No	No
13	Selected	2013-08-14	female	2018-04-18	1	4.67625	1	13	No	No	Complete health insurance for deprived citizens	No	Stable and healthy housing	Not needing a social assistance	No	No	Yes	No	No	No	0	No	No	No	No	No	No	0	No	No	No	No	No	No	No
14	Selected	2008-12-15	male	2018-04-18	1	9.33881	1	0	No	No	Full Health insurance (including a top-up policy)	No	Stable and healthy housing	Not needing a social assistance	No	No	No	No	No	No	0	No	No	No	No	No	No	0	No	No	No	No	No	No	No	2018-10-25	6.2423	No	No	Full Health insurance (including a top-up policy)	No	Stable and healthy housing	Not needing a social assistance	No	No	No	No	No	No
15	Selected	2014-10-13	female	2018-04-18	1	3.51266	1	0	No	No	Full Health insurance (including a top-up policy)	No	Stable and healthy housing	Not needing a social assistance	No	No	No	No	No	No	0	No	No	No	No	No	No	0	No	No	No	No	No	No	No
16	Selected	2009-06-25	male	2018-04-18	1	8.81314	1	9	No	No	Complete health insurance for deprived citizens	No	Stable and healthy housing	Not needing a social assistance	Yes	No	No	No	No	No	0	No	No	No	No	No	No	0	No	No	No	No	No	No	No
17	Selected	2005-06-27	female	2018-04-18	1	12.8077	1	0	No	No	Full Health insurance (including a top-up policy)	No	Stable and healthy housing	Not needing a social assistance	No	No	No	No	No	No	0	No	No	No	No	No	No	0	No	No	No	No	No	No	No
18	Selected	2012-03-31	female	2018-04-19	1	6.05065	1	0	No	No	Full Health insurance (including a top-up policy)	No	Stable and healthy housing	Not needing a social assistance	No	No	No	No	No	No	0	No	No	No	No	No	No	0	No	No	No	No	No	No	No
19	Selected	2005-10-12	male	2018-04-19	1	12.5175	1	17	No	No	Full Health insurance (including a top-up policy)	No	Unhealthy housing	Not needing a social assistance	No	No	No	No	No	No	1	No	Yes	No	No	No	No	0	No	No	No	No	No	No	No	2018-10-25	6.20945	No	No	Full Health insurance (including a top-up policy)	No	Unhealthy housing	Not needing a social assistance	No	No	No	No	No	No
20	Selected	2010-02-18	male	2018-04-19	1	8.16427	1	67	Yes	Yes	Complete health insurance for undocumented migrants	Yes	Unstable housing (temporary social housing or housed by relatives, slums)	Needing social assistance without knowing how to get this	No	No	No	No	Yes	Yes	5	Yes	Yes	Yes	Yes	No	Yes	4	No	Yes	Yes	Yes	Yes	No	Yes
21	Selected	2009-03-22	male	2018-04-19	1	9.07597	1	9	No	No	Full Health insurance (including a top-up policy)	No	Stable and healthy housing	Not needing a social assistance	No	No	Yes	No	No	No	0	No	No	No	No	No	No	0	No	No	No	No	No	No	No	2018-10-25	6.20945	No	No	Full Health insurance (including a top-up policy)	No	Stable and healthy housing	Not needing a social assistance	No	No	No	No	No	No
22	Selected	2014-07-21	female	2018-04-25	1	3.76181	1	9	No	No	Complete health insurance for deprived citizens	No	Stable and healthy housing	Not needing a social assistance	Yes	No	No	No	No	No	0	No	No	No	No	No	No	0	No	No	No	No	No	No	No
23	Selected	2010-04-18	male	2018-04-25	1	8.01916	1	0	No	No	Full Health insurance (including a top-up policy)	No	Stable and healthy housing	Not needing a social assistance	No	No	No	No	No	No	0	No	No	No	No	No	No	0	No	No	No	No	No	No	No
24	Selected	2012-03-27	male	2018-04-25	1	6.07803	1	5	No	No	Full Health insurance (including a top-up policy)	No	Stable and healthy housing	Not needing a social assistance	Yes	No	No	No	No	No	0	No	No	No	No	No	No	0	No	No	No	No	No	No	No
25	Selected	2008-12-01	female	2018-04-25	1	9.3963	1	0	No	No	Full Health insurance (including a top-up policy)	No	Stable and healthy housing	Not needing a social assistance	No	No	No	Yes	No	No	0	No	No	No	No	No	No	0	No	No	No	No	No	No	No	2018-11-15	6.70226	No	No	Full Health insurance (including a top-up policy)	No	Stable and healthy housing	Not needing a social assistance	No	No	No	No	No	No
26	Selected	2013-04-08	female	2018-04-26	1	5.0486	1	33	No	No	Complete health insurance for undocumented migrants	No	Unstable housing (temporary social housing or housed by relatives, slums)	Needing social assistance	No	No	No	No	No	Yes	2	No	Yes	No	No	No	Yes	0	No	No	No	No	No	No	No
27	Selected	2007-04-02	male	2018-04-26	1	11.0664	1	15	No	No	Complete health insurance for deprived citizens	No	Stable and healthy housing	Needing social assistance	Yes	No	No	No	No	No	0	No	No	No	No	No	No	0	No	No	No	No	No	No	No	2018-11-08	6.43942	No	No	Complete health insurance for deprived citizens	No	Stable and healthy housing	Needing social assistance	No	Yes	No	No	No	No
28	Selected	2011-11-21	male	2018-04-26	1	6.42847	1	20	No	No	Complete health insurance for deprived citizens	No	Stable and healthy housing	Not needing a social assistance	Yes	No	Yes	Yes	No	Yes	0	No	No	No	No	No	No	0	No	No	No	No	No	No	No
29	Selected	2012-04-25	female	2018-04-26	1	6.00137	1	23	No	No	Complete health insurance for undocumented migrants	No	Stable and healthy housing	Needing social assistance without knowing how to get this	Yes	No	No	No	No	No	0	No	No	No	No	No	No	0	No	No	No	No	No	No	No
30	Selected	2013-07-21	female	2018-04-27	1	4.7666	1	0	No	No	Full Health insurance (including a top-up policy)	No	Stable and healthy housing	Not needing a social assistance	No	No	No	No	No	No	0	No	No	No	No	No	No	0	No	No	No	No	No	No	No
31	Selected	2007-10-13	male	2018-04-27	1	10.538	1	21	No	No	Full Health insurance (including a top-up policy)	No	Unstable housing (temporary social housing or housed by relatives, slums)	Not needing a social assistance	Yes	No	No	Yes	No	No	0	No	No	No	No	No	No	0	No	No	No	No	No	No	No	2018-11-08	6.40657	No	No	Full Health insurance (including a top-up policy)	No	Stable and healthy housing	Not needing a social assistance	No	Yes	No	Yes	No	No
32	Selected	2007-03-21	female	2018-04-27	1	11.102	1	0	No	No	Full Health insurance (including a top-up policy)	No	Stable and healthy housing	Not needing a social assistance	No	No	No	No	No	No	0	No	No	No	No	No	No	0	No	No	No	No	No	No	No
33	Selected	2006-08-19	female	2018-04-27	1	11.6879	1	32	No	No	Complete health insurance for deprived citizens	No	Unhealthy housing	Needing social assistance without knowing how to get this	No	No	No	No	No	Yes	1	No	Yes	No	No	No	No	1	No	No	No	Yes	No	No	No
34	Selected	2012-11-13	female	2018-05-03	1	5.46749	1	21	No	No	Complete health insurance for deprived citizens	No	Unhealthy housing	Not needing a social assistance	No	No	No	No	No	No	3	Yes	Yes	No	Yes	No	No	0	No	No	No	No	No	No	No
35	Selected	2008-07-12	male	2018-05-03	1	9.80698	1	0	No	No	Full Health insurance (including a top-up policy)	No	Stable and healthy housing	Not needing a social assistance	No	No	No	No	No	No	0	No	No	No	No	No	No	0	No	No	No	No	No	No	No
36	Selected	2004-03-22	male	2018-05-03	1	14.1136	1	72	Yes	Yes	Incomplete health insurance	No	Unstable housing (temporary social housing or housed by relatives, slums)	Needing social assistance	No	No	Yes	Yes	No	Yes	3	Yes	Yes	No	No	No	Yes	2	No	No	Yes	No	Yes	No	Yes
37	Selected	2004-10-15	female	2018-05-04	1	13.5496	1	26	No	No	Complete health insurance for deprived citizens	No	Unhealthy housing	Not needing a social assistance	Yes	No	No	No	No	No	1	No	Yes	No	No	No	No	0	No	No	No	No	No	No	No	2018-11-15	6.40657	No	No	Complete health insurance for deprived citizens	No	Unhealthy housing	Needing social assistance	Yes	Yes	No	No	No	No
38	Selected	2008-06-20	male	2018-05-04	1	9.86995	1	0	No	No	Full Health insurance (including a top-up policy)	No	Stable and healthy housing	Not needing a social assistance	No	No	No	No	No	No	0	No	No	No	No	No	No	0	No	No	No	No	No	No	No
39	Selected	2002-11-06	male	2018-05-04	1	15.4908	1	0	No	No	Full Health insurance (including a top-up policy)	No	Stable and healthy housing	Not needing a social assistance	No	No	No	No	No	No	0	No	No	No	No	No	No	0	No	No	No	No	No	No	No
40	Selected	2013-03-30	male	2018-05-04	1	5.09514	1	0	No	No	Full Health insurance (including a top-up policy)	No	Stable and healthy housing	Not needing a social assistance	No	No	No	No	No	No	0	No	No	No	No	No	No	0	No	No	No	No	No	No	No
41	Selected	2011-12-22	male	2018-05-09	1	6.37919	1	34	No	No	Incomplete health insurance	No	Stable and healthy housing	Needing social assistance	No	No	Yes	No	No	Yes	2	Yes	No	No	No	No	Yes	3	Yes	Yes	Yes	No	No	No	Yes
42	Selected	2006-07-17	female	2018-05-09	1	11.8111	1	0	No	No	Full Health insurance (including a top-up policy)	No	Stable and healthy housing	Not needing a social assistance	No	No	No	No	No	No	0	No	No	No	No	No	No	0	No	No	No	No	No	No	No
43	Selected	2003-06-26	male	2018-05-09	1	14.8693	1	35	No	No	Complete health insurance for deprived citizens	No	Unhealthy housing	Needing social assistance without knowing how to get this	Yes	No	No	No	No	No	3	No	Yes	No	Yes	Yes	No	1	No	No	No	Yes	No	No	No
44	Selected	2012-05-11	male	2018-05-11	1	5.99863	1	4	No	No	Complete health insurance for deprived citizens	No	Stable and healthy housing	Not needing a social assistance	No	No	No	Yes	No	No	3	No	No	No	Yes	Yes	Yes	0	No	No	No	No	No	No	No	2018-11-21	6.37372	No	No	Complete health insurance for deprived citizens	No	Stable and healthy housing	Not needing a social assistance	No	No	No	No	No	No
45	Selected	2012-09-19	male	2018-05-11	1	5.63997	1	0	No	No	Full Health insurance (including a top-up policy)	No	Stable and healthy housing	Not needing a social assistance	No	No	No	Yes	No	No	1	No	No	No	No	Yes	No	0	No	No	No	No	No	No	No	2018-11-15	6.17659	No	No	Full Health insurance (including a top-up policy)	No	Stable and healthy housing	Not needing a social assistance	No	No	No	No	No	Yes
46	Selected	2009-01-06	male	2018-05-11	1	9.34155	1	0	No	No	Full Health insurance (including a top-up policy)	No	Stable and healthy housing	Not needing a social assistance	No	No	No	No	No	No	0	No	No	No	No	No	No	0	No	No	No	No	No	No	No
47	Selected	2012-11-29	female	2018-05-11	1	5.44559	1	6	No	No	Complete health insurance for deprived citizens	No	Stable and healthy housing	Not needing a social assistance	No	No	No	No	No	Yes	4	Yes	No	No	Yes	Yes	Yes	1	No	No	No	No	No	Yes	No	2018-11-15	6.17659	No	No	Full Health insurance (including a top-up policy)	No	Stable and healthy housing	Needing social assistance	No	No	Yes	No	No	Yes
48	Selected	2009-10-25	male	2018-05-11	1	8.54209	1	0	No	No	Full Health insurance (including a top-up policy)	No	Stable and healthy housing	Not needing a social assistance	No	No	No	No	No	No	0	No	No	No	No	No	No	0	No	No	No	No	No	No	No
49	Selected	2008-10-16	male	2018-05-17	1	9.58248	1	0	No	No	Full Health insurance (including a top-up policy)	No	Stable and healthy housing	Not needing a social assistance	No	No	No	Yes	No	No	1	No	No	No	No	Yes	No	0	No	No	No	No	No	No	No
50	Selected	2014-12-29	male	2018-05-17	1	3.38125	1	76	No	Yes	No health insurance (even if enrollment in progress or insurance abroad)	Yes	Unstable housing (temporary social housing or housed by relatives, slums)	Needing social assistance without knowing how to get this	No	No	No	Yes	Yes	Yes	5	Yes	Yes	Yes	Yes	Yes	No	6	Yes	Yes	Yes	Yes	Yes	Yes	Yes
51	Selected	2015-03-15	female	2018-05-17	1	3.17317	1	20	No	No	Full Health insurance (including a top-up policy)	No	Stable and healthy housing	Needing social assistance without knowing how to get this	No	No	Yes	No	No	Yes	1	No	No	No	No	No	Yes	0	No	No	No	No	No	No	No
52	Selected	2004-12-20	male	2018-05-17	1	13.4045	1	0	No	No	Full Health insurance (including a top-up policy)	No	Stable and healthy housing	Not needing a social assistance	No	No	No	No	No	No	0	No	No	No	No	No	No	0	No	No	No	No	No	No	No
53	Selected	2015-05-05	male	2018-05-18	1	3.03628	1	0	No	No	Full Health insurance (including a top-up policy)	No	Stable and healthy housing	Not needing a social assistance	No	No	No	No	No	No	0	No	No	No	No	No	No	0	No	No	No	No	No	No	No
54	Selected	2007-11-21	male	2018-05-18	1	10.4887	1	2	No	No	Full Health insurance (including a top-up policy)	No	Stable and healthy housing	Not needing a social assistance	No	No	No	No	Yes	No	0	No	No	No	No	No	No	0	No	No	No	No	No	No	No	2018-11-16	5.97947	No	No	Complete health insurance for deprived citizens	No	Stable and healthy housing	Not needing a social assistance	No	Yes	No	No	Yes	No
55	Selected	2004-06-27	male	2018-05-18	1	13.8891	1	9	No	No	Complete health insurance for deprived citizens	No	Stable and healthy housing	Not needing a social assistance	Yes	No	No	No	No	No	0	No	No	No	No	No	No	0	No	No	No	No	No	No	No
56	Selected	2005-08-27	female	2018-05-18	1	12.7228	1	15	No	No	Complete health insurance for deprived citizens	No	Stable and healthy housing	Needing social assistance	Yes	No	No	Yes	No	No	2	No	No	No	Yes	Yes	No	0	No	No	No	No	No	No	No	2018-11-30	6.43942	No	No	Complete health insurance for deprived citizens	No	Stable and healthy housing	Needing social assistance	Yes	Yes	Yes	No	No	No
57	Selected	2015-01-05	female	2018-05-24	1	3.38125	1	31	No	No	Complete health insurance for deprived citizens	No	Unstable housing (temporary social housing or housed by relatives, slums)	Needing social assistance	Yes	No	No	No	No	No	3	No	Yes	No	Yes	Yes	No	1	No	No	No	No	No	Yes	No	2018-11-21	5.94661	No	No	Complete health insurance for deprived citizens	No	Unstable housing (temporary social housing or housed by relatives, slums)	Needing social assistance	No	Yes	No	Yes	No	No
58	Selected	2005-11-30	male	2018-05-24	1	12.4791	1	0	No	No	Full Health insurance (including a top-up policy)	No	Stable and healthy housing	Not needing a social assistance	No	No	No	No	No	No	0	No	No	No	No	No	No	0	No	No	No	No	No	No	No
59	Selected	2009-08-01	female	2018-05-31	1	8.82957	1	0	No	No	Full Health insurance (including a top-up policy)	No	Stable and healthy housing	Not needing a social assistance	No	No	No	No	No	No	0	No	No	No	No	No	No	0	No	No	No	No	No	No	No
60	Selected	2009-06-29	male	2018-05-31	1	8.91992	1	0	No	No	Full Health insurance (including a top-up policy)	No	Stable and healthy housing	Not needing a social assistance	No	No	No	No	No	No	0	No	No	No	No	No	No	0	No	No	No	No	No	No	No
61	Selected	2005-09-03	male	2018-05-31	1	12.7392	1	43	No	No	Complete health insurance for deprived citizens	No	Unhealthy housing	Not needing a social assistance	Yes	Yes	Yes	Yes	No	No	4	No	Yes	No	Yes	Yes	Yes	0	No	No	No	No	No	No	No
62	Selected	2009-03-16	male	2018-05-31	1	9.20739	1	18	No	No	Complete health insurance for deprived citizens	No	Stable and healthy housing	Needing social assistance without knowing how to get this	Yes	No	No	No	No	No	2	No	No	No	Yes	Yes	No	0	No	No	No	No	No	No	No
63	Selected	2011-11-24	male	2018-06-01	1	6.51882	1	41	No	No	Complete health insurance for deprived citizens	No	Unhealthy housing	Needing social assistance	Yes	No	Yes	No	No	No	2	No	No	No	Yes	Yes	No	0	No	No	No	No	No	No	No	2018-11-30	5.97947	No	No	Complete health insurance for deprived citizens	No	Stable and healthy housing	3	Yes	Yes	No	No	Yes	No
64	Selected	2014-12-14	male	2018-06-01	1	3.46338	1	9	No	No	Complete health insurance for deprived citizens	No	Stable and healthy housing	Not needing a social assistance	Yes	No	No	No	No	No	1	No	No	No	No	Yes	No	0	No	No	No	No	No	No	No
65	Selected	2011-07-04	female	2018-06-01	1	6.91033	1	4	No	No	Complete health insurance for deprived citizens	No	Stable and healthy housing	Not needing a social assistance	No	No	No	No	No	No	0	No	No	No	No	No	No	0	No	No	No	No	No	No	No
66	Selected	2015-01-11	female	2018-06-06	1	3.40041	1	5	No	No	Full Health insurance (including a top-up policy)	No	Stable and healthy housing	Not needing a social assistance	Yes	No	No	No	No	No	1	No	No	No	No	Yes	No	0	No	No	No	No	No	No	No
67	Selected	2012-08-18	male	2018-06-06	1	5.79877	1	32	No	No	Complete health insurance for deprived citizens	No	Unhealthy housing	Needing social assistance	Yes	No	No	No	No	No	3	No	Yes	No	Yes	Yes	No	0	No	No	No	No	No	No	No
68	Selected	2013-02-10	female	2018-06-06	1	5.31691	1	2	No	No	Full Health insurance (including a top-up policy)	No	Stable and healthy housing	Not needing a social assistance	No	No	No	No	Yes	No	0	No	No	No	No	No	No	0	No	No	No	No	No	No	No
69	Selected	2013-07-04	male	2018-06-07	1	4.92539	1	15	No	No	Complete health insurance for deprived citizens	No	Stable and healthy housing	Needing social assistance	Yes	No	No	No	No	No	1	No	No	No	No	Yes	No	0	No	No	No	No	No	No	No
70	Selected	2009-04-14	male	2018-06-07	1	9.14716	1	24	No	No	Complete health insurance for deprived citizens	No	Stable and healthy housing	Needing social assistance	Yes	No	Yes	No	No	No	1	No	No	No	No	Yes	No	0	No	No	No	No	No	No	No
71	Selected	2006-12-20	female	2018-06-14	1	11.4825	1	5	No	No	Full Health insurance (including a top-up policy)	No	Stable and healthy housing	Not needing a social assistance	Yes	No	No	No	No	No	1	No	No	No	Yes	No	No	0	No	No	No	No	No	No	No
72	Selected	2014-05-29	male	2018-06-14	1	4.04381	1	20	No	No	Complete health insurance for deprived citizens	No	Unstable housing (temporary social housing or housed by relatives, slums)	Not needing a social assistance	No	No	No	No	No	No	1	No	No	No	No	Yes	No	0	No	No	No	No	No	No	No
73	Selected	2004-03-26	female	2018-06-14	1	14.2177	1	36	No	No	Complete health insurance for undocumented migrants	No	Unhealthy housing	Needing social assistance	No	No	No	No	Yes	Yes	2	Yes	No	No	Yes	No	No	2	No	Yes	Yes	No	No	No	Yes
74	Selected	2004-12-06	male	2018-06-15	1	13.5222	1	0	No	No	Full Health insurance (including a top-up policy)	No	Stable and healthy housing	Not needing a social assistance	No	No	No	No	No	No	0	No	No	No	No	No	No	0	No	No	No	No	No	No	No
75	Selected	2012-10-10	male	2018-06-15	1	5.6783	1	0	No	No	Full Health insurance (including a top-up policy)	No	Stable and healthy housing	Not needing a social assistance	No	No	No	No	No	No	0	No	No	No	No	No	No	0	No	No	No	No	No	No	No
76	Selected	2015-05-30	female	2018-07-06	1	3.10198	1	0	No	No	Full Health insurance (including a top-up policy)	No	Stable and healthy housing	Not needing a social assistance	No	No	No	No	No	No	0	No	No	No	No	No	No	0	No	No	No	No	No	No	No
77	Selected	2015-04-03	female	2018-07-06	1	3.25804	1	23	No	No	Complete health insurance for deprived citizens	No	Unhealthy housing	Not needing a social assistance	No	No	No	No	Yes	No	0	No	No	No	No	No	No	0	No	No	No	No	No	No	No
78	Selected	2007-12-18	male	2018-08-01	1	10.6201	1	4	No	No	Complete health insurance for deprived citizens	No	Stable and healthy housing	Not needing a social assistance	No	No	No	No	No	No	0	No	No	No	No	No	No	0	No	No	No	No	No	No	No
79	Selected	2010-03-16	female	2018-08-01	1	8.37782	1	2	No	No	Full Health insurance (including a top-up policy)	No	Stable and healthy housing	Not needing a social assistance	No	No	No	No	Yes	No	0	No	No	No	No	No	No	0	No	No	No	No	No	No	No
80	Selected	2013-12-03	male	2018-08-01	1	4.65982	1	0	No	No	Full Health insurance (including a top-up policy)	No	Stable and healthy housing	Not needing a social assistance	No	No	No	No	No	No	0	No	No	No	No	No	No	0	No	No	No	No	No	No	No
81	Selected	2008-06-10	male	2018-09-06	1	10.2396	1	0	No	No	Full Health insurance (including a top-up policy)	No	Stable and healthy housing	Not needing a social assistance	No	No	No	No	No	No	0	No	No	No	No	No	No	0	No	No	No	No	No	No	No
82	Selected	2009-07-01	female	2018-09-06	1	9.18275	1	9	No	No	Complete health insurance for deprived citizens	No	Stable and healthy housing	Not needing a social assistance	Yes	No	No	No	No	No	0	No	No	No	No	No	No	0	No	No	No	No	No	No	No
83	Selected	2014-04-28	female	2018-09-06	1	4.35866	1	15	No	No	Full Health insurance (including a top-up policy)	No	Stable and healthy housing	Needing social assistance	No	No	Yes	Yes	No	No	1	No	No	No	No	Yes	No	0	No	No	No	No	No	No	No
84	Selected	2015-01-02	male	2018-09-06	1	3.67693	1	0	No	No	Full Health insurance (including a top-up policy)	No	Stable and healthy housing	Not needing a social assistance	No	No	No	No	No	No	0	No	No	No	No	No	No	0	No	No	No	No	No	No	No
85	Selected	2011-06-05	male	2018-09-06	1	7.2553	1	0	No	No	Full Health insurance (including a top-up policy)	No	Stable and healthy housing	Not needing a social assistance	No	No	No	No	No	No	0	No	No	No	No	No	No	0	No	No	No	No	No	No	No
86	Selected	2013-09-27	male	2018-09-07	1	4.94456	1	23	No	No	Incomplete health insurance	No	Stable and healthy housing	Needing social assistance	No	No	No	No	No	No	0	No	No	No	No	No	No	0	No	No	No	No	No	No	No
87	Selected	2015-05-21	female	2018-09-07	1	3.29911	1	20	No	No	Full Health insurance (including a top-up policy)	No	Stable and healthy housing	Needing social assistance	Yes	No	Yes	Yes	No	No	2	No	No	No	No	Yes	Yes	0	No	No	No	No	No	No	No
88	Selected	2003-05-20	male	2018-09-07	1	15.3018	1	9	No	No	Full Health insurance (including a top-up policy)	No	Stable and healthy housing	Not needing a social assistance	No	No	Yes	Yes	No	No	1	No	No	No	No	Yes	No	0	No	No	No	No	No	No	No
89	Selected	2006-04-16	female	2018-09-07	1	12.3943	1	0	No	No	Full Health insurance (including a top-up policy)	No	Stable and healthy housing	Not needing a social assistance	No	No	No	No	No	No	0	No	No	No	No	No	No	0	No	No	No	No	No	No	No
90	Selected	2009-11-17	female	2018-09-07	1	8.80493	1	0	No	No	Full Health insurance (including a top-up policy)	No	Stable and healthy housing	Not needing a social assistance	No	No	No	No	No	No	0	No	No	No	No	No	No	0	No	No	No	No	No	No	No
91	Selected	2004-10-29	female	2018-09-12	1	13.87	1	4	No	No	Complete health insurance for deprived citizens	No	Stable and healthy housing	Not needing a social assistance	No	No	No	No	No	No	0	No	No	No	No	No	No	0	No	No	No	No	No	No	No
92	Selected	2005-12-10	female	2018-09-12	1	12.7556	1	0	No	No	Full Health insurance (including a top-up policy)	No	Stable and healthy housing	Not needing a social assistance	No	No	No	No	No	No	0	No	No	No	No	No	No	0	No	No	No	No	No	No	No
93	Selected	2011-04-05	female	2018-09-12	1	7.43874	1	0	No	No	Full Health insurance (including a top-up policy)	No	Stable and healthy housing	Not needing a social assistance	No	No	No	No	No	No	0	No	No	No	No	No	No	0	No	No	No	No	No	No	No
94	Selected	2012-02-03	female	2018-09-12	1	6.60643	1	9	No	No	Full Health insurance (including a top-up policy)	No	Stable and healthy housing	Not needing a social assistance	No	No	Yes	No	No	No	1	No	No	No	No	No	Yes	0	No	No	No	No	No	No	No
95	Selected	2006-01-30	male	2018-09-12	1	12.616	1	24	No	No	Complete health insurance for deprived citizens	No	Stable and healthy housing	Needing social assistance	Yes	No	Yes	Yes	No	No	3	No	No	No	Yes	Yes	Yes	0	No	No	No	No	No	No	No
96	Selected	2003-05-16	female	2018-09-13	1	15.3292	1	4	No	No	Complete health insurance for deprived citizens	No	Stable and healthy housing	Not needing a social assistance	No	No	No	No	No	No	0	No	No	No	No	No	No	1	No	No	No	No	No	Yes	No
97	Selected	2014-06-29	male	2018-09-13	1	4.20808	1	6	No	No	Complete health insurance for deprived citizens	No	Stable and healthy housing	Not needing a social assistance	No	No	No	No	No	Yes	0	No	No	No	No	No	No	0	No	No	No	No	No	No	No
98	Selected	2012-05-02	male	2018-07-18	1	6.20945	1	98	Yes	Yes	No health insurance (even if enrollment in progress or insurance abroad)	Yes	Unstable housing (temporary social housing or housed by relatives, slums)	Needing social assistance without knowing how to get this	Yes	No	Yes	Yes	Yes	Yes	5	Yes	Yes	Yes	Yes	No	Yes	4	Yes	Yes	Yes	No	No	Yes	Yes
99	Selected	2009-03-06	male	2018-07-18	1	9.36619	1	69	No	Yes	No health insurance (even if enrollment in progress or insurance abroad)	Yes	Stable and healthy housing	Needing social assistance	Yes	No	Yes	Yes	Yes	No	5	Yes	Yes	Yes	Yes	No	Yes	4	Yes	Yes	Yes	No	No	Yes	Yes
100	Selected	2012-03-09	male	2018-07-19	1	6.36003	1	50	No	No	No health insurance (even if enrollment in progress or insurance abroad)	No	Unstable housing (temporary social housing or housed by relatives, slums)	Needing social assistance	No	No	No	No	Yes	No	1	Yes	No	No	No	No	No	3	Yes	Yes	Yes	No	No	No	Yes
101	Selected	2006-03-23	female	2018-07-24	1	12.3368	1	90	Yes	Yes	No health insurance (even if enrollment in progress or insurance abroad)	Yes	Unstable housing (temporary social housing or housed by relatives, slums)	Needing social assistance	No	No	Yes	No	Yes	Yes	4	Yes	No	Yes	Yes	No	Yes	4	Yes	Yes	Yes	No	Yes	No	Yes
102	Selected	2014-01-04	female	2018-08-21	1	4.62697	1	82	No	Yes	No health insurance (even if enrollment in progress or insurance abroad)	Yes	Unstable housing (temporary social housing or housed by relatives, slums)	Needing social assistance	No	No	Yes	Yes	Yes	Yes	3	Yes	Yes	No	Yes	No	No	3	Yes	Yes	No	No	No	Yes	Yes
103	Selected	2012-06-29	female	2018-08-22	1	6.14647	1	86	Yes	Yes	No health insurance (even if enrollment in progress or insurance abroad)	No	Unhealthy housing	Needing social assistance	Yes	Yes	No	Yes	Yes	No	1	No	Yes	No	No	No	No	5	Yes	Yes	Yes	Yes	No	Yes	Yes
104	Selected	2012-04-03	female	2018-08-22	1	6.38467	1	67	No	Yes	No health insurance (even if enrollment in progress or insurance abroad)	No	Unstable housing (temporary social housing or housed by relatives, slums)	Needing social assistance without knowing how to get this	No	No	No	No	Yes	No	5	Yes	Yes	No	Yes	Yes	Yes	3	Yes	Yes	Yes	No	No	No	Yes
105	Selected	2007-07-02	male	2018-08-30	1	11.1622	1	89	Yes	Yes	No health insurance (even if enrollment in progress or insurance abroad)	Yes	Unstable housing (temporary social housing or housed by relatives, slums)	Needing social assistance	No	Yes	No	Yes	Yes	Yes	2	Yes	No	Yes	No	No	No	4	Yes	No	Yes	No	Yes	Yes	Yes
106	Selected	2011-10-25	female	2018-09-04	1	6.86105	1	64	No	Yes	No health insurance (even if enrollment in progress or insurance abroad)	No	Unstable housing (temporary social housing or housed by relatives, slums)	Needing social assistance	No	No	No	No	Yes	No	1	Yes	No	No	No	No	No	2	Yes	Yes	No	No	No	No	Yes
107	Selected	2009-11-21	male	2018-09-13	1	8.8104	1	57	Yes	Yes	Complete health insurance for undocumented migrants	No	Unstable housing (temporary social housing or housed by relatives, slums)	Needing social assistance	No	No	No	No	Yes	Yes	4	Yes	Yes	No	Yes	No	Yes	4	Yes	Yes	Yes	Yes	No	No	Yes
108	Selected	2011-11-18	female	2018-09-13	1	6.81999	1	79	Yes	Yes	No health insurance (even if enrollment in progress or insurance abroad)	Yes	Unstable housing (temporary social housing or housed by relatives, slums)	Needing social assistance	No	No	No	No	Yes	No	3	Yes	No	Yes	No	No	Yes	3	Yes	Yes	Yes	No	No	No	Yes
109	Selected	2009-01-04	female	2018-09-21	1	9.71116	1	65	Yes	Yes	Complete health insurance for undocumented migrants	No	Unstable housing (temporary social housing or housed by relatives, slums)	Needing social assistance without knowing how to get this	Yes	No	No	No	Yes	Yes	4	Yes	Yes	No	Yes	No	Yes	5	Yes	No	Yes	Yes	Yes	Yes	Yes
110	Selected	2009-04-29	male	2018-09-21	1	9.3963	1	0	No	No	Full Health insurance (including a top-up policy)	No	Stable and healthy housing	Not needing a social assistance	No	No	No	No	No	No	1	No	No	No	No	Yes	No	0	No	No	No	No	No	No	No
111	Selected	2009-05-10	female	2018-09-26	1	9.37988	1	0	No	No	Full Health insurance (including a top-up policy)	No	Stable and healthy housing	Not needing a social assistance	No	No	No	No	No	No	0	No	No	No	No	No	No	0	No	No	No	No	No	No	No
112	Selected	2005-08-01	male	2018-09-26	1	13.1526	1	0	No	No	Full Health insurance (including a top-up policy)	No	Stable and healthy housing	Not needing a social assistance	No	No	No	No	No	No	0	No	No	No	No	No	No	0	No	No	No	No	No	No	No
113	Selected	2012-03-15	male	2018-09-26	1	6.53251	1	6	No	No	Full Health insurance (including a top-up policy)	No	Stable and healthy housing	Needing social assistance	No	No	No	Yes	No	No	1	No	No	No	No	Yes	No	0	No	No	No	No	No	No	No
114	Selected	2011-11-17	male	2018-09-26	1	6.85832	1	83	Yes	Yes	No health insurance (even if enrollment in progress or insurance abroad)	No	Unstable housing (temporary social housing or housed by relatives, slums)	Needing social assistance	No	No	Yes	No	Yes	Yes	4	Yes	Yes	Yes	No	No	Yes	4	Yes	Yes	Yes	No	No	Yes	Yes
115	Selected	2012-05-15	female	2018-09-11	1	6.32444	1	95	Yes	Yes	No health insurance (even if enrollment in progress or insurance abroad)	Yes	Unstable housing (temporary social housing or housed by relatives, slums)	Needing social assistance	Yes	No	Yes	No	Yes	Yes	4	No	Yes	Yes	Yes	No	Yes	1	Yes	No	No	No	No	No	No
116	Selected	2011-01-20	female	2018-09-19	1	7.66324	1	50	Yes	Yes	Incomplete health insurance	No	Stable and healthy housing	Needing social assistance without knowing how to get this	No	No	No	No	Yes	No	1	Yes	No	No	No	No	No	3	Yes	Yes	Yes	No	No	No	Yes
117	Selected	2003-07-03	female	2018-09-17	1	15.2088	1	63	Yes	Yes	Complete health insurance for deprived citizens	No	Unstable housing (temporary social housing or housed by relatives, slums)	Needing social assistance	Yes	Yes	No	No	Yes	No	4	Yes	Yes	No	Yes	No	Yes	3	Yes	Yes	Yes	No	No	No	Yes
118	Selected	2013-09-29	female	2018-09-17	1	4.96646	1	114	Yes	Yes	No health insurance (even if enrollment in progress or insurance abroad)	Yes	Homelessness	Needing social assistance without knowing how to get this	Yes	Yes	Yes	No	Yes	No	5	Yes	Yes	Yes	Yes	No	Yes	3	Yes	Yes	Yes	No	No	No	Yes
119	Selected	2014-02-21	female	2018-10-04	1	4.61602	1	4	No	No	Complete health insurance for deprived citizens	No	Stable and healthy housing	Not needing a social assistance	No	No	No	No	No	No	0	No	No	No	No	No	No	0	No	No	No	No	No	No	No
120	Selected	2009-04-01	male	2018-10-04	1	9.50856	1	70	No	No	No health insurance (even if enrollment in progress or insurance abroad)	Yes	Unhealthy housing	Needing social assistance without knowing how to get this	No	No	Yes	Yes	Yes	No	5	Yes	Yes	Yes	Yes	No	Yes	4	Yes	Yes	Yes	Yes	No	No	Yes
121	Selected	2007-09-09	female	2018-10-04	1	11.0691	1	0	No	No	Full Health insurance (including a top-up policy)	No	Stable and healthy housing	Not needing a social assistance	No	No	No	No	No	No	0	No	No	No	No	No	No	0	No	No	No	No	No	No	No
122	Selected	2011-10-09	male	2018-10-04	1	6.987	1	18	No	No	Complete health insurance for deprived citizens	No	Stable and healthy housing	Not needing a social assistance	Yes	No	Yes	No	No	No	2	No	No	No	No	Yes	Yes	0	No	No	No	No	No	No	No
123	Selected	2002-11-09	female	2018-10-10	1	15.9179	1	16	No	No	Complete health insurance for deprived citizens	Yes	Stable and healthy housing	Not needing a social assistance	Yes	No	No	No	No	No	2	No	No	Yes	No	Yes	No	0	No	No	No	No	No	No	No
124	Selected	2003-04-28	male	2018-10-10	1	15.4524	1	37	No	No	No health insurance (even if enrollment in progress or insurance abroad)	No	Stable and healthy housing	Needing social assistance without knowing how to get this	No	No	No	No	No	Yes	1	Yes	No	No	No	No	No	1	No	Yes	No	No	No	No	No
125	Selected	2007-03-07	male	2018-10-10	1	11.5948	1	0	No	No	Full Health insurance (including a top-up policy)	No	Stable and healthy housing	Not needing a social assistance	No	No	No	No	No	No	0	No	No	No	No	No	No	0	No	No	No	No	No	No	No
126	Selected	2006-07-18	male	2018-10-11	1	12.2327	1	5	No	No	Full Health insurance (including a top-up policy)	No	Stable and healthy housing	Not needing a social assistance	Yes	No	No	No	No	No	1	No	No	No	No	Yes	No	0	No	No	No	No	No	No	No
127	Selected	2015-06-28	female	2018-10-11	1	3.28816	1	6	No	No	Complete health insurance for deprived citizens	No	Stable and healthy housing	Not needing a social assistance	No	No	No	No	Yes	No	0	No	No	No	No	No	No	0	No	No	No	No	No	No	No
128	Selected	2014-03-29	male	2018-10-18	1	4.55578	1	5	No	No	Full Health insurance (including a top-up policy)	No	Stable and healthy housing	Not needing a social assistance	Yes	No	No	No	No	No	0	No	No	No	No	No	No	0	No	No	No	No	No	No	No
129	Selected	2015-04-12	male	2018-10-24	1	3.53457	1	4	No	No	Complete health insurance for deprived citizens	No	Stable and healthy housing	Not needing a social assistance	No	No	No	No	No	No	0	No	No	No	No	No	No	0	No	No	No	No	No	No	No
130	Selected	2015-01-03	male	2018-10-24	1	3.80561	1	0	No	No	Full Health insurance (including a top-up policy)	No	Stable and healthy housing	Not needing a social assistance	No	No	No	No	No	No	0	No	No	No	No	No	No	0	No	No	No	No	No	No	No
131	Selected	2004-04-09	male	2018-10-24	1	14.5407	1	4	No	No	Complete health insurance for deprived citizens	No	Stable and healthy housing	Not needing a social assistance	No	No	No	No	No	No	0	No	No	No	No	No	No	0	No	No	No	No	No	No	No
132	Selected	2014-03-05	male	2018-10-18	1	4.62149	1	89	Yes	Yes	No health insurance (even if enrollment in progress or insurance abroad)	Yes	Unstable housing (temporary social housing or housed by relatives, slums)	Needing social assistance	No	Yes	No	No	Yes	Yes	4	Yes	Yes	Yes	Yes	No	No	2	Yes	No	Yes	No	No	No	Yes
133	Selected	2009-04-12	female	2018-10-18	1	9.51677	1	90	Yes	Yes	No health insurance (even if enrollment in progress or insurance abroad)	Yes	Unstable housing (temporary social housing or housed by relatives, slums)	Needing social assistance without knowing how to get this	No	Yes	No	No	No	Yes	5	Yes	Yes	Yes	Yes	No	Yes	4	Yes	Yes	Yes	No	Yes	No	Yes
134	Selected	2005-05-04	male	2018-10-16	1	13.4511	1	70	No	No	No health insurance (even if enrollment in progress or insurance abroad)	Yes	Unstable housing (temporary social housing or housed by relatives, slums)	Needing social assistance	Yes	Yes	No	No	Yes	No	4	Yes	Yes	No	Yes	No	Yes	3	Yes	Yes	Yes	No	No	No	Yes
135	Selected	2008-04-25	male	2018-09-27	1	10.423	1	31	Yes	No	Complete health insurance for deprived citizens	No	Stable and healthy housing	Needing social assistance	Yes	Yes	No	No	No	No	3	No	No	No	Yes	Yes	Yes	0	No	No	No	No	No	No	No
136	Selected	2015-03-07	female	2018-09-06	1	3.50171	1	50	No	Yes	Complete health insurance for undocumented migrants	No	Stable and healthy housing	Needing social assistance	No	Yes	Yes	No	Yes	Yes	4	Yes	Yes	No	Yes	No	Yes	0	No	No	No	No	No	No	No
137	Selected	2015-05-08	female	2018-11-07	1	3.50171	1	0	No	No	Full Health insurance (including a top-up policy)	No	Stable and healthy housing	Not needing a social assistance	No	No	No	No	No	No	0	No	No	No	No	No	No	0	No	No	No	No	No	No	No
138	Selected	2011-08-06	male	2018-11-07	1	7.2553	1	11	No	No	Complete health insurance for deprived citizens	No	Stable and healthy housing	Not needing a social assistance	Yes	No	No	No	Yes	No	2	No	No	No	No	Yes	Yes	0	No	No	No	No	No	No	No
139	Selected	2005-05-12	male	2018-11-07	1	13.4894	1	27	No	No	Complete health insurance for deprived citizens	No	Unhealthy housing	Needing social assistance	No	No	No	Yes	No	No	4	No	Yes	No	Yes	Yes	Yes	0	No	No	No	No	No	No	No
140	Selected	2011-06-24	male	2018-09-28	1	7.26352	1	53	No	No	No health insurance (even if enrollment in progress or insurance abroad)	No	Stable and healthy housing	Needing social assistance	No	Yes	Yes	No	Yes	Yes	4	Yes	Yes	No	Yes	No	Yes	3	Yes	Yes	Yes	No	No	No	Yes
141	Selected	2012-06-01	male	2018-10-30	1	6.41205	1	94	Yes	Yes	No health insurance (even if enrollment in progress or insurance abroad)	Yes	Homelessness	Needing social assistance without knowing how to get this	No	No	No	No	Yes	Yes	5	Yes	Yes	Yes	Yes	No	Yes	4	Yes	Yes	Yes	No	No	Yes	Yes
142	Selected	2013-04-14	male	2018-11-16	1	5.59069	1	0	No	No	Full Health insurance (including a top-up policy)	No	Stable and healthy housing	Not needing a social assistance	No	No	No	No	No	No	0	No	No	No	No	No	No	0	No	No	No	No	No	No	No
143	Selected	2002-12-17	male	2018-11-16	1	15.9151	1	0	No	No	Full Health insurance (including a top-up policy)	No	Stable and healthy housing	Not needing a social assistance	No	No	No	No	No	No	0	No	No	No	No	No	No	0	No	No	No	No	No	No	No
144	Selected	2005-08-17	female	2018-11-16	1	13.2485	1	0	No	No	Full Health insurance (including a top-up policy)	No	Stable and healthy housing	Not needing a social assistance	No	No	No	No	No	No	0	No	No	No	No	No	No	0	No	No	No	No	No	No	No
145	Selected	2013-02-16	male	2018-11-21	1	5.76044	1	81	Yes	Yes	No health insurance (even if enrollment in progress or insurance abroad)	Yes	Unstable housing (temporary social housing or housed by relatives, slums)	Needing social assistance	No	No	No	Yes	Yes	Yes	3	Yes	Yes	Yes	No	No	No	4	Yes	Yes	Yes	Yes	No	No	Yes
146	Selected	2013-06-18	male	2018-11-08	1	5.39083	1	41	Yes	No	Complete health insurance for undocumented migrants	No	Unstable housing (temporary social housing or housed by relatives, slums)	Needing social assistance	No	No	No	No	Yes	No	4	Yes	Yes	No	Yes	No	Yes	4	Yes	Yes	Yes	Yes	No	No	Yes
147	Selected	2012-06-05	female	2019-07-08	1	7.0883	1	21	No	No	Complete health insurance for deprived citizens	No	Stable and healthy housing	Needing social assistance	No	No	Yes	No	No	Yes	3	Yes	Yes	No	No	No	Yes	0	No	No	No	No	No	No	No
148	Selected	2013-02-19	female	2019-04-30	1	6.19028	1	87	No	Yes	No health insurance (even if enrollment in progress or insurance abroad)	Yes	Unstable housing (temporary social housing or housed by relatives, slums)	Needing social assistance without knowing how to get this	Yes	Yes	No	No	Yes	No	4	Yes	Yes	No	Yes	No	Yes	4	Yes	Yes	Yes	No	No	Yes	Yes
149	Selected	2015-08-10	female	2019-07-09	1	3.91239	1	56	Yes	No	Complete health insurance for undocumented migrants	Yes	Unstable housing (temporary social housing or housed by relatives, slums)	Needing social assistance without knowing how to get this	Yes	No	No	No	Yes	No	5	Yes	Yes	Yes	Yes	No	Yes	2	Yes	Yes	No	No	No	No	Yes
150	Selected	2007-09-12	female	2019-07-09	1	11.822	1	69	No	No	No health insurance (even if enrollment in progress or insurance abroad)	Yes	Unstable housing (temporary social housing or housed by relatives, slums)	Needing social assistance without knowing how to get this	No	No	Yes	No	Yes	No	5	Yes	Yes	Yes	Yes	No	Yes	4	Yes	Yes	Yes	No	No	Yes	Yes
151	Selected	2008-08-27	male	2019-07-10	1	10.8665	1	59	Yes	Yes	No health insurance (even if enrollment in progress or insurance abroad)	No	Stable and healthy housing	Needing social assistance without knowing how to get this	No	No	No	No	No	Yes	2	Yes	No	No	Yes	No	No	3	Yes	Yes	Yes	No	No	No	Yes
152	Selected	2009-11-12	male	2019-04-10	1	9.40725	1	50	Yes	Yes	No health insurance (even if enrollment in progress or insurance abroad)	No	Stable and healthy housing	Not needing a social assistance	No	No	No	No	Yes	No	1	Yes	No	No	No	No	No	4	Yes	Yes	Yes	No	No	Yes	Yes
153	Selected	2016-03-10	male	2019-07-10	1	3.33196	1	2	No	No	Full Health insurance (including a top-up policy)	No	Stable and healthy housing	Not needing a social assistance	No	No	No	No	Yes	No	0	No	No	No	No	No	No	0	No	No	No	No	No	No	No
154	Selected	2009-09-14	female	2019-07-10	1	9.81793	1	9	No	No	Complete health insurance for deprived citizens	No	Stable and healthy housing	Not needing a social assistance	Yes	No	No	No	No	No	0	No	No	No	No	No	No	0	No	No	No	No	No	No	No
155	Selected	2015-05-20	female	2019-07-10	1	4.13963	1	10	No	No	Complete health insurance for deprived citizens	No	Stable and healthy housing	Needing social assistance	No	No	No	No	No	No	0	No	No	No	No	No	No	0	No	No	No	No	No	No	No
156	Selected	2011-11-16	female	2018-12-19	1	7.09103	1	34	No	No	No health insurance (even if enrollment in progress or insurance abroad)	No	Stable and healthy housing	Needing social assistance	No	No	No	No	Yes	No	2	Yes	No	No	No	No	Yes	3	Yes	Yes	Yes	No	No	No	Yes
157	Selected	2010-11-05	female	2019-06-03	1	8.57495	1	87	No	No	No health insurance (even if enrollment in progress or insurance abroad)	Yes	Homelessness	Needing social assistance without knowing how to get this	No	Yes	Yes	No	Yes	No	4	Yes	Yes	Yes	No	No	Yes	3	Yes	Yes	Yes	No	No	No	Yes
158	Selected	2015-03-03	male	2019-04-03	1	4.08487	1	63	No	No	No health insurance (even if enrollment in progress or insurance abroad)	No	Unstable housing (temporary social housing or housed by relatives, slums)	Needing social assistance without knowing how to get this	No	Yes	No	No	Yes	Yes	3	Yes	No	No	Yes	No	Yes	3	Yes	Yes	Yes	No	No	No	Yes
159	Selected	2013-09-10	female	2019-04-30	1	5.6345	1	64	No	Yes	No health insurance (even if enrollment in progress or insurance abroad)	Yes	Stable and healthy housing	Needing social assistance	No	No	Yes	No	Yes	No	1	Yes	No	No	No	No	No	3	Yes	Yes	Yes	No	No	No	Yes
160	Selected	2015-06-01	male	2019-05-14	1	3.95072	1	67	Yes	No	Incomplete health insurance	No	Unhealthy housing	Needing social assistance	No	Yes	Yes	No	No	Yes	3	Yes	No	No	Yes	No	Yes	4	Yes	Yes	Yes	No	No	Yes	Yes
161	Selected	2005-11-23	male	2019-04-25	1	13.4182	1	89	Yes	Yes	No health insurance (even if enrollment in progress or insurance abroad)	Yes	Unstable housing (temporary social housing or housed by relatives, slums)	Needing social assistance without knowing how to get this	Yes	No	No	No	Yes	Yes	4	Yes	No	Yes	Yes	No	Yes	4	Yes	Yes	Yes	No	No	Yes	Yes
162	Selected	2008-12-30	male	2019-04-15	1	10.2888	1	111	Yes	Yes	No health insurance (even if enrollment in progress or insurance abroad)	Yes	Homelessness	Needing social assistance without knowing how to get this	No	Yes	Yes	No	Yes	Yes	5	Yes	Yes	Yes	Yes	No	Yes	4	Yes	Yes	Yes	No	No	Yes	Yes
163	Selected	2014-12-12	male	2019-05-14	1	4.41889	1	93	No	Yes	No health insurance (even if enrollment in progress or insurance abroad)	Yes	Unstable housing (temporary social housing or housed by relatives, slums)	Needing social assistance without knowing how to get this	No	Yes	Yes	No	Yes	Yes	3	Yes	Yes	No	No	No	Yes	4	Yes	Yes	Yes	No	No	Yes	Yes
164	Selected	2014-07-30	male	2019-04-09	1	4.69268	1	77	No	Yes	No health insurance (even if enrollment in progress or insurance abroad)	No	Unstable housing (temporary social housing or housed by relatives, slums)	Needing social assistance without knowing how to get this	No	Yes	No	Yes	Yes	Yes	5	Yes	Yes	Yes	Yes	No	Yes	4	Yes	Yes	Yes	No	No	Yes	Yes
165	Selected	2006-05-18	female	2019-04-11	1	12.898	1	77	No	Yes	No health insurance (even if enrollment in progress or insurance abroad)	No	Unstable housing (temporary social housing or housed by relatives, slums)	Needing social assistance	Yes	Yes	No	No	Yes	No	4	Yes	Yes	No	Yes	No	Yes	4	Yes	Yes	Yes	No	No	Yes	Yes
166	Selected	2014-01-01	male	2019-04-11	1	5.2731	1	102	Yes	Yes	No health insurance (even if enrollment in progress or insurance abroad)	Yes	Homelessness	Needing social assistance	Yes	Yes	No	No	Yes	No	5	Yes	Yes	Yes	Yes	No	Yes	4	Yes	Yes	Yes	No	No	Yes	Yes
167	Selected	2004-06-05	male	2019-04-23	1	14.8802	1	82	No	Yes	No health insurance (even if enrollment in progress or insurance abroad)	Yes	Unstable housing (temporary social housing or housed by relatives, slums)	Needing social assistance without knowing how to get this	No	Yes	No	No	Yes	No	3	Yes	Yes	No	No	No	Yes	4	Yes	Yes	Yes	No	No	Yes	Yes
168	Selected	2012-02-03	female	2019-06-21	1	6.83368	1	54	No	Yes	Complete health insurance for deprived citizens	Yes	Unstable housing (temporary social housing or housed by relatives, slums)	Needing social assistance without knowing how to get this	No	No	No	No	Yes	Yes	4	Yes	Yes	Yes	No	No	Yes	4	Yes	Yes	Yes	No	Yes	No	Yes
169	Selected	2011-06-13	female	2018-11-29	1	7.86311	1	64	No	Yes	No health insurance (even if enrollment in progress or insurance abroad)	No	Unstable housing (temporary social housing or housed by relatives, slums)	Needing social assistance	No	No	No	No	Yes	No	3	Yes	Yes	No	Yes	No	No	3	Yes	Yes	Yes	No	No	No	Yes
170	Selected	2015-09-25	female	2018-11-29	1	3.78918	1	27	No	No	Complete health insurance for deprived citizens	No	Unhealthy housing	Needing social assistance	No	No	No	No	No	No	1	No	Yes	No	No	No	No	1	No	No	No	Yes	No	No	No
171	Selected	2014-07-13	male	2019-01-16	1	4.99384	1	85	No	Yes	No health insurance (even if enrollment in progress or insurance abroad)	Yes	Unstable housing (temporary social housing or housed by relatives, slums)	Needing social assistance	Yes	No	Yes	Yes	Yes	No	5	Yes	Yes	Yes	Yes	No	Yes	3	Yes	Yes	Yes	No	No	No	Yes
172	Selected	2012-01-08	female	2018-12-04	1	7.50445	1	43	No	No	No health insurance (even if enrollment in progress or insurance abroad)	No	Stable and healthy housing	Needing social assistance	No	No	Yes	No	Yes	No	1	Yes	No	No	No	No	No	3	Yes	Yes	Yes	No	No	No	Yes
173	Selected	2009-04-12	female	2019-04-24	1	10.245	1	92	Yes	Yes	No health insurance (even if enrollment in progress or insurance abroad)	Yes	Unstable housing (temporary social housing or housed by relatives, slums)	Needing social assistance without knowing how to get this	No	Yes	No	No	Yes	Yes	3	Yes	No	No	Yes	No	Yes	3	Yes	Yes	Yes	No	No	No	Yes
174	Selected	2010-10-28	female	2019-07-10	1	8.70363	1	4	No	No	Complete health insurance for deprived citizens	No	Stable and healthy housing	Not needing a social assistance	No	No	No	No	No	No	0	No	No	No	No	No	No	0	No	No	No	No	No	No	No
175	Selected	2015-09-22	female	2019-07-11	1	3.80014	1	0	No	No	Full Health insurance (including a top-up policy)	No	Stable and healthy housing	Not needing a social assistance	No	No	No	No	No	No	0	No	No	No	No	No	No	0	No	No	No	No	No	No	No
176	Selected	2016-05-10	male	2019-07-11	1	3.17043	1	0	No	No	Full Health insurance (including a top-up policy)	No	Stable and healthy housing	Not needing a social assistance	No	No	No	No	No	No	0	No	No	No	No	No	No	0	No	No	No	No	No	No	No
177	Selected	2008-12-20	male	2019-07-11	1	10.5572	1	84	No	Yes	No health insurance (even if enrollment in progress or insurance abroad)	Yes	Unstable housing (temporary social housing or housed by relatives, slums)	Needing social assistance	Yes	Yes	No	Yes	Yes	No	6	Yes	Yes	Yes	Yes	Yes	Yes	4	Yes	Yes	Yes	No	No	Yes	Yes
178	Selected	2010-04-12	male	2019-07-12	1	9.24572	1	41	No	No	Complete health insurance for deprived citizens	No	Unhealthy housing	Needing social assistance	Yes	No	Yes	No	No	No	1	No	Yes	No	No	No	No	1	No	No	No	Yes	No	No	No
179	Selected	2012-07-27	male	2019-07-11	1	6.95414	1	69	No	No	No health insurance (even if enrollment in progress or insurance abroad)	No	Unstable housing (temporary social housing or housed by relatives, slums)	Needing social assistance	No	Yes	Yes	No	Yes	Yes	2	Yes	No	No	No	No	Yes	3	Yes	Yes	No	No	Yes	No	Yes
180	Selected	2013-01-07	female	2019-07-12	1	6.50787	1	9	No	No	Full Health insurance (including a top-up policy)	No	Stable and healthy housing	Not needing a social assistance	No	No	Yes	No	No	No	0	No	No	No	No	No	No	0	No	No	No	No	No	No	No
181	Selected	2006-06-14	male	2019-07-12	1	13.076	1	5	No	No	Full Health insurance (including a top-up policy)	No	Stable and healthy housing	Not needing a social assistance	Yes	No	No	Yes	No	No	0	No	No	No	No	No	No	0	No	No	No	No	No	No	No
182	Selected	2016-06-02	female	2019-07-11	1	3.10746	1	0	No	No	Full Health insurance (including a top-up policy)	No	Stable and healthy housing	Not needing a social assistance	No	No	No	No	No	No	0	No	No	No	No	No	No	0	No	No	No	No	No	No	No
183	Selected	2013-12-28	female	2019-07-11	1	5.53593	1	0	No	No	Full Health insurance (including a top-up policy)	No	Stable and healthy housing	Not needing a social assistance	No	No	No	Yes	No	No	0	No	No	No	No	No	No	0	No	No	No	No	No	No	No
184	Selected	2016-06-02	female	2019-07-12	1	3.11841	1	0	No	No	Full Health insurance (including a top-up policy)	No	Stable and healthy housing	Not needing a social assistance	No	No	No	Yes	No	No	0	No	No	No	No	No	No	0	No	No	No	No	No	No	No
185	Selected	2006-10-17	male	2019-07-12	1	12.7447	1	79	Yes	Yes	No health insurance (even if enrollment in progress or insurance abroad)	Yes	Unstable housing (temporary social housing or housed by relatives, slums)	Needing social assistance	No	No	No	Yes	Yes	No	5	Yes	No	Yes	Yes	Yes	Yes	3	Yes	Yes	No	No	No	Yes	Yes
186	Selected	2007-11-07	female	2019-07-12	1	11.6879	1	15	No	No	Complete health insurance for deprived citizens	No	Stable and healthy housing	Needing social assistance	Yes	No	No	No	No	No	1	No	Yes	No	No	No	No	0	No	No	No	No	No	No	No
187	Selected	2013-04-20	female	2019-07-12	1	6.23682	1	20	No	No	Full Health insurance (including a top-up policy)	No	Stable and healthy housing	Needing social assistance	Yes	No	Yes	No	No	No	0	No	No	No	No	No	No	0	No	No	No	No	No	No	No
188	Selected	2010-12-22	male	2019-07-16	1	8.564	1	0	No	No	Full Health insurance (including a top-up policy)	No	Stable and healthy housing	Not needing a social assistance	No	No	No	No	No	No	0	No	No	No	No	No	No	0	No	No	No	No	No	No	No
189	Selected	2013-11-21	male	2019-07-16	1	5.65366	1	0	No	No	Full Health insurance (including a top-up policy)	No	Stable and healthy housing	Not needing a social assistance	No	No	No	No	No	No	0	No	No	No	No	No	No	0	No	No	No	No	No	No	No
190	Selected	2009-04-09	male	2019-07-16	1	10.2724	1	22	No	No	Full Health insurance (including a top-up policy)	No	Stable and healthy housing	Not needing a social assistance	Yes	Yes	Yes	No	No	No	3	No	Yes	No	Yes	Yes	No	1	No	No	No	No	No	Yes	No
191	Selected	2004-07-14	male	2019-07-16	1	15.0089	1	0	No	No	Full Health insurance (including a top-up policy)	No	Stable and healthy housing	Not needing a social assistance	No	No	No	No	No	No	0	No	No	No	No	No	No	0	No	No	No	No	No	No	No
192	Selected	2011-01-01	female	2019-07-16	1	8.54209	1	0	No	No	Full Health insurance (including a top-up policy)	No	Stable and healthy housing	Not needing a social assistance	No	No	No	No	No	No	0	No	No	No	No	No	No	0	No	No	No	No	No	No	No
193	Selected	2010-01-01	male	2019-07-18	1	9.54141	1	38	No	No	Complete health insurance for deprived citizens	No	Unhealthy housing	Needing social assistance	No	No	Yes	No	No	Yes	1	No	Yes	No	No	No	No	1	No	No	No	Yes	No	No	No
194	Selected	2004-02-25	female	2019-07-18	1	15.3922	1	9	No	No	Full Health insurance (including a top-up policy)	No	Stable and healthy housing	Not needing a social assistance	No	No	Yes	No	No	No	1	No	No	Yes	No	No	No	0	No	No	No	No	No	No	No
195	Selected	2013-11-15	male	2019-07-18	1	5.67009	1	0	No	No	Full Health insurance (including a top-up policy)	No	Stable and healthy housing	Not needing a social assistance	No	No	No	No	No	No	0	No	No	No	No	No	No	0	No	No	No	No	No	No	No
196	Selected	2014-06-22	male	2019-07-18	1	5.0705	1	0	No	No	Full Health insurance (including a top-up policy)	No	Stable and healthy housing	Not needing a social assistance	No	No	No	No	No	No	1	No	Yes	No	No	No	No	0	No	No	No	No	No	No	No
197	Selected	2016-01-20	male	2019-07-18	1	3.49076	1	9	No	No	Complete health insurance for deprived citizens	No	Stable and healthy housing	Not needing a social assistance	Yes	No	No	No	No	No	3	No	Yes	No	Yes	Yes	No	0	No	No	No	No	No	No	No
198	Selected	2016-03-30	female	2019-07-18	1	3.30185	1	9	No	No	Complete health insurance for deprived citizens	No	Stable and healthy housing	Not needing a social assistance	Yes	No	No	No	No	No	0	No	No	No	No	No	No	0	No	No	No	No	No	No	No
199	Selected	2010-10-11	male	2019-07-18	1	8.76934	1	8	No	No	Full Health insurance (including a top-up policy)	No	Stable and healthy housing	Not needing a social assistance	No	Yes	No	No	No	No	2	No	No	No	Yes	Yes	No	0	No	No	No	No	No	No	No
200	Selected	2013-08-14	male	2019-07-18	1	5.92745	1	0	No	No	Full Health insurance (including a top-up policy)	No	Stable and healthy housing	Not needing a social assistance	No	No	No	No	No	No	0	No	No	No	No	No	No	0	No	No	No	No	No	No	No
201	Selected	2007-02-02	female	2019-07-18	1	12.4572	1	6	No	No	Full Health insurance (including a top-up policy)	No	Stable and healthy housing	Needing social assistance	No	No	No	Yes	No	No	0	No	No	No	No	No	No	0	No	No	No	No	No	No	No
202	Selected	2016-06-26	female	2019-07-19	1	3.06092	1	0	No	No	Full Health insurance (including a top-up policy)	No	Stable and healthy housing	Not needing a social assistance	No	No	No	No	No	No	0	No	No	No	No	No	No	0	No	No	No	No	No	No	No
203	Selected	2010-01-25	male	2019-07-19	1	9.47844	1	40	No	No	Full Health insurance (including a top-up policy)	No	Unhealthy housing	Needing social assistance without knowing how to get this	Yes	No	Yes	No	No	No	3	No	Yes	No	Yes	No	Yes	2	No	Yes	No	Yes	No	No	Yes
204	Selected	2009-06-29	male	2019-07-19	1	10.0534	1	0	No	No	Full Health insurance (including a top-up policy)	No	Stable and healthy housing	Not needing a social assistance	No	No	No	No	No	No	0	No	No	No	No	No	No	0	No	No	No	No	No	No	No
205	Selected	2008-05-14	female	2019-07-19	1	11.1786	1	0	No	No	Full Health insurance (including a top-up policy)	No	Stable and healthy housing	Not needing a social assistance	No	No	No	No	No	No	0	No	No	No	No	No	No	0	No	No	No	No	No	No	No
206	Selected	2004-11-09	male	2019-07-19	1	14.6968	1	14	No	No	Full Health insurance (including a top-up policy)	No	Stable and healthy housing	Not needing a social assistance	Yes	No	Yes	No	No	No	2	No	No	No	Yes	No	Yes	0	No	No	No	No	No	No	No
207	Selected	2009-02-02	male	2019-07-19	1	10.4641	1	0	No	No	Full Health insurance (including a top-up policy)	No	Stable and healthy housing	Not needing a social assistance	No	No	No	No	No	No	0	No	No	No	No	No	No	0	No	No	No	No	No	No	No
208	Selected	2013-03-11	female	2019-07-19	1	6.36276	1	26	No	No	Incomplete health insurance	No	Stable and healthy housing	Not needing a social assistance	No	No	Yes	No	No	No	0	No	No	No	No	No	No	0	No	No	No	No	No	No	No
209	Selected	2012-08-08	male	2019-07-19	1	6.9514	1	2	No	No	Full Health insurance (including a top-up policy)	No	Stable and healthy housing	Not needing a social assistance	No	No	No	No	Yes	No	0	No	No	No	No	No	No	0	No	No	No	No	No	No	No
210	Selected	2008-09-13	female	2019-07-22	1	10.8528	1	25	No	No	Complete health insurance for deprived citizens	No	Unstable housing (temporary social housing or housed by relatives, slums)	Not needing a social assistance	Yes	No	No	Yes	No	No	0	No	No	No	No	No	No	0	No	No	No	No	No	No	No
211	Selected	2012-07-19	female	2019-07-22	1	7.00616	1	9	No	No	Full Health insurance (including a top-up policy)	No	Stable and healthy housing	Not needing a social assistance	No	No	Yes	No	No	No	1	No	No	No	No	No	Yes	0	No	No	No	No	No	No	No
212	Selected	2014-01-02	female	2019-07-22	1	5.54962	1	5	No	No	Full Health insurance (including a top-up policy)	No	Stable and healthy housing	Not needing a social assistance	Yes	No	No	No	No	No	2	No	No	No	Yes	Yes	No	0	No	No	No	No	No	No	No
213	Selected	2014-11-11	female	2019-07-22	1	4.69541	1	0	No	No	Full Health insurance (including a top-up policy)	No	Stable and healthy housing	Not needing a social assistance	No	No	No	No	No	No	0	No	No	No	No	No	No	0	No	No	No	No	No	No	No
214	Selected	2010-11-02	female	2019-07-22	1	8.72006	1	11	No	No	Complete health insurance for deprived citizens	No	Stable and healthy housing	Not needing a social assistance	Yes	No	No	No	Yes	No	3	No	No	No	Yes	Yes	Yes	0	No	No	No	No	No	No	No
215	Selected	2006-09-29	female	2019-07-22	1	12.8131	1	19	No	No	Full Health insurance (including a top-up policy)	No	Stable and healthy housing	Needing social assistance	Yes	Yes	No	Yes	No	No	3	No	No	No	Yes	Yes	Yes	0	No	No	No	No	No	No	No
216	Selected	2011-04-20	female	2019-07-22	1	8.25736	1	0	No	No	Full Health insurance (including a top-up policy)	No	Stable and healthy housing	Not needing a social assistance	No	No	No	No	No	No	0	No	No	No	No	No	No	0	No	No	No	No	No	No	No
217	Selected	2011-08-27	male	2019-07-23	1	7.90418	1	10	No	No	Complete health insurance for deprived citizens	No	Stable and healthy housing	Needing social assistance	No	No	No	No	No	No	1	No	No	No	Yes	No	No	0	No	No	No	No	No	No	No
218	Selected	2005-02-12	male	2019-07-23	1	14.4394	1	9	No	No	Complete health insurance for deprived citizens	No	Stable and healthy housing	Not needing a social assistance	Yes	No	No	No	No	No	2	No	No	No	Yes	Yes	No	0	No	No	No	No	No	No	No
219	Selected	2013-10-01	male	2019-07-23	1	5.80698	1	42	No	No	Complete health insurance for deprived citizens	No	Unstable housing (temporary social housing or housed by relatives, slums)	Needing social assistance without knowing how to get this	Yes	Yes	No	No	No	No	3	No	Yes	No	Yes	Yes	No	0	No	No	No	No	No	No	No
220	Selected	2015-03-13	female	2019-07-23	1	4.36413	1	0	No	No	Full Health insurance (including a top-up policy)	No	Stable and healthy housing	Not needing a social assistance	No	No	No	No	No	No	0	No	No	No	No	No	No	0	No	No	No	No	No	No	No
221	Selected	2011-03-07	male	2019-07-23	1	8.38056	1	0	No	No	Full Health insurance (including a top-up policy)	No	Stable and healthy housing	Not needing a social assistance	No	No	No	No	No	No	0	No	No	No	No	No	No	0	No	No	No	No	No	No	No
222	Selected	2016-03-10	male	2019-07-23	1	3.37029	1	0	No	No	Full Health insurance (including a top-up policy)	No	Stable and healthy housing	Not needing a social assistance	No	No	No	Yes	No	No	1	No	No	No	Yes	No	No	0	No	No	No	No	No	No	No
223	Selected	2014-11-09	female	2019-07-23	1	4.70363	1	0	No	No	Full Health insurance (including a top-up policy)	No	Stable and healthy housing	Not needing a social assistance	No	No	No	No	No	No	0	No	No	No	No	No	No	0	No	No	No	No	No	No	No
224	Not Selected	2015-12-09	male	2019-07-24	1	3.62218	0		No	No		No	Stable and healthy housing	Not needing a social assistance	Yes	No	No	No	No	No	1	No	No	No	No	Yes	No	0	No	No	No	No	No	No	No
225	Selected	2008-04-11	female	2019-07-24	1	11.2827	1	5	No	No	Full Health insurance (including a top-up policy)	No	Stable and healthy housing	Not needing a social assistance	Yes	No	No	No	No	No	1	No	Yes	No	No	No	No	0	No	No	No	No	No	No	No
226	Selected	2011-09-02	male	2019-07-24	1	7.89049	1	26	No	No	Complete health insurance for deprived citizens	No	Unhealthy housing	Not needing a social assistance	Yes	No	No	No	No	No	3	No	Yes	No	Yes	Yes	No	0	No	No	No	No	No	No	No
227	Selected	2008-09-25	male	2019-07-24	1	10.8255	1	4	No	No	Complete health insurance for deprived citizens	No	Stable and healthy housing	Not needing a social assistance	No	No	No	No	No	No	0	No	No	No	No	No	No	0	No	No	No	No	No	No	No
228	Selected	2016-04-02	female	2019-07-24	1	3.30732	1	12	No	No	Complete health insurance for deprived citizens	No	Stable and healthy housing	Not needing a social assistance	No	Yes	No	No	No	No	0	No	No	No	No	No	No	0	No	No	No	No	No	No	No
229	Selected	2012-05-07	female	2019-07-24	1	7.21424	1	9	No	No	Full Health insurance (including a top-up policy)	No	Stable and healthy housing	Not needing a social assistance	No	No	Yes	No	No	No	1	No	No	No	No	No	Yes	0	No	No	No	No	No	No	No
230	Selected	2016-06-05	male	2019-07-24	1	3.13484	1	4	No	No	Complete health insurance for deprived citizens	No	Stable and healthy housing	Not needing a social assistance	No	No	No	No	No	No	1	No	No	No	Yes	No	No	0	No	No	No	No	No	No	No
231	Selected	2013-01-04	male	2019-07-24	1	6.55168	1	0	No	No	Full Health insurance (including a top-up policy)	No	Stable and healthy housing	Not needing a social assistance	No	No	No	No	No	No	0	No	No	No	No	No	No	0	No	No	No	No	No	No	No
232	Selected	2012-04-06	female	2019-07-24	1	7.29911	1	13	No	No	Complete health insurance for deprived citizens	No	Stable and healthy housing	Not needing a social assistance	No	No	Yes	No	No	No	1	No	No	No	No	No	Yes	0	No	No	No	No	No	No	No
233	Selected	2009-04-06	male	2019-07-25	1	10.2998	1	14	No	No	Full Health insurance (including a top-up policy)	No	Stable and healthy housing	Not needing a social assistance	Yes	No	Yes	No	No	No	2	Yes	No	No	No	No	Yes	1	No	No	No	No	Yes	No	No
234	Selected	2003-11-14	male	2019-07-25	1	15.6934	1	36	No	No	Complete health insurance for deprived citizens	No	Unhealthy housing	Needing social assistance	No	No	Yes	Yes	No	No	2	No	No	No	Yes	No	Yes	0	No	No	No	No	No	No	No
235	Selected	2006-09-05	female	2019-07-25	1	12.8843	1	0	No	No	Full Health insurance (including a top-up policy)	No	Stable and healthy housing	Not needing a social assistance	No	No	No	No	No	No	0	No	No	No	No	No	No	0	No	No	No	No	No	No	No
236	Selected	2014-03-29	female	2019-07-25	1	5.32238	1	5	No	No	Full Health insurance (including a top-up policy)	No	Stable and healthy housing	Not needing a social assistance	Yes	No	No	No	No	No	1	No	No	No	No	Yes	No	0	No	No	No	No	No	No	No
237	Selected	2011-07-10	female	2019-07-25	1	8.04381	1	15	No	No	Full Health insurance (including a top-up policy)	No	Stable and healthy housing	Needing social assistance	No	No	Yes	No	No	No	3	Yes	No	No	No	Yes	Yes	0	No	No	No	No	No	No	No
238	Selected	2004-07-01	female	2019-07-25	1	15.0664	1	9	No	No	Full Health insurance (including a top-up policy)	No	Stable and healthy housing	Not needing a social assistance	No	No	Yes	No	No	No	0	No	No	No	No	No	No	0	No	No	No	No	No	No	No
239	Selected	2005-09-06	female	2019-07-25	1	13.8836	1	4	No	No	Complete health insurance for deprived citizens	No	Stable and healthy housing	Not needing a social assistance	No	No	No	No	No	No	4	No	Yes	No	Yes	Yes	Yes	2	No	Yes	No	Yes	No	No	Yes
240	Selected	2007-10-20	female	2019-07-25	1	11.7645	1	0	No	No	Full Health insurance (including a top-up policy)	No	Stable and healthy housing	Not needing a social assistance	No	No	No	No	No	No	0	No	No	No	No	No	No	0	No	No	No	No	No	No	No
241	Selected	2004-10-15	female	2019-07-25	1	14.7734	1	4	No	No	Complete health insurance for deprived citizens	No	Stable and healthy housing	Not needing a social assistance	No	No	No	No	No	No	0	No	No	No	No	No	No	0	No	No	No	No	No	No	No
242	Selected	2014-12-20	female	2019-07-26	1	4.59685	1	56	No	Yes	No health insurance (even if enrollment in progress or insurance abroad)	No	Stable and healthy housing	Needing social assistance without knowing how to get this	Yes	No	No	Yes	Yes	No	3	Yes	No	No	No	Yes	Yes	3	Yes	Yes	Yes	No	No	No	Yes
243	Selected	2010-12-06	male	2019-07-26	1	8.63518	1	14	No	No	Full Health insurance (including a top-up policy)	No	Stable and healthy housing	Not needing a social assistance	Yes	No	Yes	No	No	No	1	No	Yes	No	No	No	No	0	No	No	No	No	No	No	No
244	Selected	2013-04-29	male	2019-07-26	1	6.23956	1	11	No	No	Full Health insurance (including a top-up policy)	No	Stable and healthy housing	Not needing a social assistance	No	No	Yes	No	Yes	No	0	No	No	No	No	No	No	0	No	No	No	No	No	No	No
245	Selected	2004-05-10	female	2019-07-26	1	15.2088	1	0	No	No	Full Health insurance (including a top-up policy)	No	Stable and healthy housing	Not needing a social assistance	No	No	No	Yes	No	No	0	No	No	No	No	No	No	0	No	No	No	No	No	No	No
246	Selected	2009-07-18	female	2019-07-26	1	10.0287	1	44	No	No	Complete health insurance for deprived citizens	No	Unhealthy housing	Needing social assistance	No	Yes	Yes	No	No	No	4	No	Yes	No	Yes	Yes	Yes	0	No	No	No	No	No	No	No
247	Selected	2010-06-21	female	2019-07-26	1	9.10335	1	4	No	No	Complete health insurance for deprived citizens	No	Stable and healthy housing	Not needing a social assistance	No	No	No	No	No	No	1	No	No	No	Yes	No	No	0	No	No	No	No	No	No	No
248	Selected	2016-06-25	male	2019-07-26	1	3.09103	1	0	No	No	Full Health insurance (including a top-up policy)	No	Stable and healthy housing	Not needing a social assistance	No	No	No	No	No	No	0	No	No	No	No	No	No	0	No	No	No	No	No	No	No
249	Selected	2011-04-19	female	2019-07-26	1	8.27652	1	17	Yes	No	Full Health insurance (including a top-up policy)	No	Stable and healthy housing	Not needing a social assistance	No	No	Yes	No	No	No	0	No	No	No	No	No	No	0	No	No	No	No	No	No	No
250	Selected	2007-05-08	female	2019-07-29	1	12.2245	1	53	No	Yes	Complete health insurance for deprived citizens	No	Unstable housing (temporary social housing or housed by relatives, slums)	Needing social assistance	Yes	Yes	No	No	No	No	3	No	Yes	No	Yes	Yes	No	1	No	No	No	Yes	No	No	No
251	Selected	2006-02-18	male	2019-07-29	1	13.4401	1	9	No	No	Complete health insurance for deprived citizens	No	Stable and healthy housing	Not needing a social assistance	Yes	No	No	No	No	No	2	No	Yes	No	Yes	No	No	0	No	No	No	No	No	No	No
252	Selected	2015-04-18	male	2019-07-29	1	4.282	1	4	No	No	Complete health insurance for deprived citizens	No	Stable and healthy housing	Not needing a social assistance	No	No	No	No	No	No	1	No	No	No	No	No	Yes	0	No	No	No	No	No	No	No
253	Selected	2007-12-12	female	2019-07-29	1	11.6304	1	10	No	No	Complete health insurance for deprived citizens	No	Stable and healthy housing	Needing social assistance	No	No	No	No	No	No	0	No	No	No	No	No	No	0	No	No	No	No	No	No	No
254	Selected	2004-07-01	female	2019-07-29	1	15.0773	1	15	No	No	Full Health insurance (including a top-up policy)	No	Stable and healthy housing	Needing social assistance	No	No	Yes	No	No	No	0	No	No	No	No	No	No	0	No	No	No	No	No	No	No
255	Selected	2010-04-29	male	2019-07-29	1	9.2293	1	0	No	No	Full Health insurance (including a top-up policy)	No	Stable and healthy housing	Not needing a social assistance	No	No	No	Yes	No	No	0	No	No	No	No	No	No	0	No	No	No	No	No	No	No
256	Selected	2013-06-21	male	2019-07-30	1	4.98289	1	0	No	No	Full Health insurance (including a top-up policy)	No	Stable and healthy housing	Not needing a social assistance	No	No	No	No	No	No	0	No	No	No	No	No	No	0	No	No	No	No	No	No	No
257	Selected	2005-12-25	female	2019-07-30	1	12.2519	1	0	No	No	Full Health insurance (including a top-up policy)	No	Stable and healthy housing	Not needing a social assistance	No	No	No	No	No	No	0	No	No	No	No	No	No	0	No	No	No	No	No	No	No
258	Selected	2004-09-18	female	2019-07-30	1	13.5414	1	11	No	No	Full Health insurance (including a top-up policy)	No	Stable and healthy housing	Needing social assistance	Yes	No	No	No	No	No	1	No	No	No	No	Yes	No	0	No	No	No	No	No	No	No
259	Selected	2013-12-30	female	2019-07-30	1	5.57974	1	17	No	No	Complete health insurance for undocumented migrants	No	Stable and healthy housing	Not needing a social assistance	No	Yes	No	No	No	No	2	No	No	No	Yes	No	Yes	0	No	No	No	No	No	No	No
260	Selected	2005-03-13	male	2019-07-30	1	14.3792	1	95	Yes	Yes	No health insurance (even if enrollment in progress or insurance abroad)	No	Homelessness	Needing social assistance without knowing how to get this	No	Yes	No	No	Yes	Yes	4	Yes	Yes	No	Yes	No	Yes	4	Yes	Yes	Yes	No	Yes	No	Yes
261	Selected	2003-09-20	female	2019-07-30	1	15.8576	1	5	No	No	Full Health insurance (including a top-up policy)	No	Stable and healthy housing	Not needing a social assistance	Yes	No	No	No	No	No	1	No	No	No	No	Yes	No	0	No	No	No	No	No	No	No
262	Selected	2016-07-22	female	2019-07-30	1	3.01985	1	0	No	No	Full Health insurance (including a top-up policy)	No	Stable and healthy housing	Not needing a social assistance	No	No	No	No	No	No	0	No	No	No	No	No	No	0	No	No	No	No	No	No	No
263	Selected	2015-10-11	male	2019-07-30	1	3.80014	1	0	No	No	Full Health insurance (including a top-up policy)	No	Stable and healthy housing	Not needing a social assistance	No	No	No	No	No	No	0	No	No	No	No	No	No	0	No	No	No	No	No	No	No
264	Selected	2014-07-18	female	2019-07-30	1	5.03217	1	4	No	No	Complete health insurance for deprived citizens	No	Stable and healthy housing	Not needing a social assistance	No	No	No	No	No	No	0	No	No	No	No	No	No	0	No	No	No	No	No	No	No
265	Selected	2016-05-24	female	2019-07-31	1	3.18138	1	0	No	No	Full Health insurance (including a top-up policy)	No	Stable and healthy housing	Not needing a social assistance	No	No	No	No	No	No	0	No	No	No	No	No	No	0	No	No	No	No	No	No	No
266	Selected	2003-12-08	female	2019-07-31	1	15.6441	1	28	No	No	Full Health insurance (including a top-up policy)	No	Unhealthy housing	Needing social assistance	Yes	No	No	No	No	No	3	Yes	Yes	No	Yes	No	No	1	No	No	No	No	No	Yes	No
267	Selected	2009-06-02	male	2019-07-31	1	10.1602	1	4	No	No	Complete health insurance for deprived citizens	No	Stable and healthy housing	Not needing a social assistance	No	No	No	No	No	No	2	No	No	No	Yes	No	Yes	0	No	No	No	No	No	No	No
268	Selected	2007-10-31	female	2019-07-31	1	11.7481	1	8	No	No	Full Health insurance (including a top-up policy)	No	Stable and healthy housing	Not needing a social assistance	No	Yes	No	No	No	No	1	No	No	No	Yes	No	No	0	No	No	No	No	No	No	No
269	Selected	2013-10-06	female	2019-07-31	1	5.8152	1	0	No	No	Full Health insurance (including a top-up policy)	No	Stable and healthy housing	Not needing a social assistance	No	No	No	No	No	No	0	No	No	No	No	No	No	0	No	No	No	No	No	No	No
270	Selected	2011-12-20	male	2019-07-31	1	7.61123	1	0	No	No	Full Health insurance (including a top-up policy)	No	Stable and healthy housing	Not needing a social assistance	No	No	No	No	No	No	0	No	No	No	No	No	No	0	No	No	No	No	No	No	No
271	Selected	2009-09-08	male	2019-07-31	1	9.89185	1	4	No	No	Complete health insurance for deprived citizens	No	Stable and healthy housing	Not needing a social assistance	No	No	No	No	No	No	0	No	No	No	No	No	No	0	No	No	No	No	No	No	No
272	Selected	2015-02-22	female	2019-07-31	1	4.43532	1	17	No	No	Full Health insurance (including a top-up policy)	No	Unhealthy housing	Not needing a social assistance	No	No	No	No	No	No	1	No	Yes	No	No	No	No	0	No	No	No	No	No	No	No
273	Selected	2012-10-07	male	2019-08-01	1	6.81177	1	0	No	No	Full Health insurance (including a top-up policy)	No	Stable and healthy housing	Not needing a social assistance	No	No	No	No	No	No	0	No	No	No	No	No	No	0	No	No	No	No	No	No	No
274	Selected	2012-11-22	male	2019-08-01	1	6.68857	1	0	No	No	Full Health insurance (including a top-up policy)	No	Stable and healthy housing	Not needing a social assistance	No	No	No	No	No	No	1	No	No	No	No	Yes	No	0	No	No	No	No	No	No	No
275	Selected	2011-06-22	male	2019-08-01	1	8.10951	1	0	No	No	Full Health insurance (including a top-up policy)	No	Stable and healthy housing	Not needing a social assistance	No	No	No	No	No	No	0	No	No	No	No	No	No	0	No	No	No	No	No	No	No
276	Not Selected	2011-01-21	male	2019-08-01	1	8.52567	0		No	No	Full Health insurance (including a top-up policy)	No	Stable and healthy housing	Not needing a social assistance	No	No	No	No	No		0	No	No	No	No	No	No	0	No	No	No	No	No	No	No
277	Selected	2010-04-10	male	2019-08-01	1	9.30869	1	0	No	No	Full Health insurance (including a top-up policy)	No	Stable and healthy housing	Not needing a social assistance	No	No	No	No	No	No	0	No	No	No	No	No	No	0	No	No	No	No	No	No	No
278	Selected	2011-11-24	female	2019-08-01	1	7.68515	1	0	No	No	Full Health insurance (including a top-up policy)	No	Stable and healthy housing	Not needing a social assistance	No	No	No	No	No	No	1	No	No	No	Yes	No	No	0	No	No	No	No	No	No	No
279	Selected	2014-11-01	male	2019-08-01	1	4.74743	1	15	No	No	Complete health insurance for deprived citizens	No	Stable and healthy housing	Needing social assistance	Yes	No	No	No	No	No	3	No	Yes	No	Yes	Yes	No	0	No	No	No	No	No	No	No
280	Selected	2007-08-26	female	2019-08-01	1	11.9316	1	9	No	No	Full Health insurance (including a top-up policy)	No	Stable and healthy housing	Not needing a social assistance	No	No	Yes	No	No	No	1	No	No	No	No	No	Yes	0	No	No	No	No	No	No	No
281	Selected	2012-02-27	male	2019-08-02	1	7.42505	1	5	No	No	Full Health insurance (including a top-up policy)	No	Stable and healthy housing	Not needing a social assistance	Yes	No	No	No	No	No	1	Yes	No	No	No	No	No	0	No	No	No	No	No	No	No
282	Selected	2009-02-12	female	2019-08-02	1	10.4668	1	39	No	No	Complete health insurance for deprived citizens	No	Unhealthy housing	Needing social assistance without knowing how to get this	No	No	Yes	No	No	No	3	No	Yes	No	Yes	No	Yes	0	No	No	No	No	No	No	No
283	Selected	2007-05-18	female	2019-08-02	1	12.2081	1	0	No	No	Full Health insurance (including a top-up policy)	No	Stable and healthy housing	Not needing a social assistance	No	No	No	No	No	No	0	No	No	No	No	No	No	0	No	No	No	No	No	No	No
284	Selected	2004-02-26	male	2019-08-02	1	15.4305	1	0	No	No	Full Health insurance (including a top-up policy)	No	Stable and healthy housing	Not needing a social assistance	No	No	No	Yes	No	No	1	No	No	No	Yes	No	No	0	No	No	No	No	No	No	No
285	Selected	2012-01-27	male	2019-08-05	1	7.51266	1	0	No	No	Full Health insurance (including a top-up policy)	No	Stable and healthy housing	Not needing a social assistance	No	No	No	No	No	No	0	No	No	No	No	No	No	0	No	No	No	No	No	No	No
286	Selected	2015-10-06	female	2019-08-05	1	3.83025	1	2	No	No	Full Health insurance (including a top-up policy)	No	Stable and healthy housing	Not needing a social assistance	No	No	No	No	No	Yes	1	No	No	No	No	No	Yes	0	No	No	No	No	No	No	No
287	Selected	2009-11-19	female	2019-08-05	1	9.70842	1	43	Yes	No	Complete health insurance for deprived citizens	No	Unstable housing (temporary social housing or housed by relatives, slums)	Needing social assistance	No	No	Yes	Yes	No	No	5	Yes	Yes	Yes	Yes	No	Yes	3	No	Yes	Yes	No	Yes	No	Yes
288	Selected	2008-03-20	female	2019-08-05	1	11.3758	1	4	No	No	Complete health insurance for deprived citizens	No	Stable and healthy housing	Not needing a social assistance	No	No	No	No	No	No	1	No	No	No	Yes	No	No	0	No	No	No	No	No	No	No
289	Selected	2008-06-15	male	2019-08-05	1	11.1376	1	31	No	No	Complete health insurance for deprived citizens	No	Unhealthy housing	Needing social assistance	No	No	No	No	Yes	Yes	1	No	Yes	No	No	No	No	1	No	No	No	No	Yes	No	No
290	Selected	2016-03-02	male	2019-08-05	1	3.42505	1	5	No	No	Full Health insurance (including a top-up policy)	No	Stable and healthy housing	Not needing a social assistance	Yes	No	No	No	No	No	2	No	No	No	Yes	Yes	No	0	No	No	No	No	No	No	No
291	Selected	2014-10-26	male	2019-08-05	1	4.77481	1	0	No	No	Full Health insurance (including a top-up policy)	No	Stable and healthy housing	Not needing a social assistance	No	No	No	No	No	No	0	No	No	No	No	No	No	0	No	No	No	No	No	No	No
292	Selected	2012-07-30	female	2019-08-05	1	7.01437	1	26	No	No	Complete health insurance for deprived citizens	No	Stable and healthy housing	Not needing a social assistance	Yes	Yes	Yes	No	No	No	3	No	No	No	Yes	Yes	Yes	0	No	No	No	No	No	No	No
293	Selected	2015-11-20	male	2019-08-06	1	3.70705	1	4	No	No	Complete health insurance for deprived citizens	No	Stable and healthy housing	Not needing a social assistance	No	No	No	No	No	No	0	No	No	No	No	No	No	0	No	No	No	No	No	No	No
294	Selected	2007-04-23	female	2019-08-06	1	12.2875	1	8	No	No	Complete health insurance for deprived citizens	No	Stable and healthy housing	Not needing a social assistance	No	No	No	No	Yes	Yes	0	No	No	No	No	No	No	0	No	No	No	No	No	No	No
295	Selected	2016-01-30	male	2019-08-06	1	3.5154	1	4	No	No	Complete health insurance for deprived citizens	No	Stable and healthy housing	Not needing a social assistance	No	No	No	No	No	No	0	No	No	No	No	No	No	0	No	No	No	No	No	No	No
296	Selected	2016-03-27	female	2019-08-06	1	3.35934	1	34	No	No	Complete health insurance for deprived citizens	No	Stable and healthy housing	Needing social assistance	Yes	Yes	Yes	No	Yes	No	3	No	Yes	No	Yes	No	Yes	0	No	No	No	No	No	No	No
297	Selected	2007-01-29	male	2019-08-06	1	12.5175	1	0	No	No	Full Health insurance (including a top-up policy)	No	Stable and healthy housing	Not needing a social assistance	No	No	No	No	No	No	0	No	No	No	No	No	No	0	No	No	No	No	No	No	No
298	Selected	2005-06-03	female	2019-08-06	1	14.1739	1	6	No	No	Complete health insurance for deprived citizens	No	Stable and healthy housing	Not needing a social assistance	No	No	No	No	No	Yes	0	No	No	No	No	No	No	0	No	No	No	No	No	No	No
299	Selected	2011-06-03	female	2019-08-06	1	8.17522	1	0	No	No	Full Health insurance (including a top-up policy)	No	Stable and healthy housing	Not needing a social assistance	No	No	No	No	No	No	0	No	No	No	No	No	No	0	No	No	No	No	No	No	No
300	Selected	2014-02-20	female	2019-08-06	1	5.45654	1	5	No	No	Full Health insurance (including a top-up policy)	No	Stable and healthy housing	Not needing a social assistance	Yes	No	No	No	No	No	1	No	No	No	Yes	No	No	0	No	No	No	No	No	No	No
301	Selected	2011-08-15	female	2019-08-07	1	7.97536	1	0	No	No	Full Health insurance (including a top-up policy)	No	Stable and healthy housing	Not needing a social assistance	No	No	No	No	No	No	0	No	No	No	No	No	No	0	No	No	No	No	No	No	No
302	Selected	2009-09-12	male	2019-08-07	1	9.90007	1	0	No	No	Full Health insurance (including a top-up policy)	No	Stable and healthy housing	Not needing a social assistance	No	No	No	No	No	No	0	No	No	No	No	No	No	0	No	No	No	No	No	No	No
303	Selected	2015-04-08	male	2019-08-07	1	4.33128	1	0	No	No	Full Health insurance (including a top-up policy)	No	Stable and healthy housing	Not needing a social assistance	No	No	No	No	No	No	0	No	No	No	No	No	No	0	No	No	No	No	No	No	No
304	Selected	2015-12-10	male	2019-08-07	1	3.65777	1	0	No	No	Full Health insurance (including a top-up policy)	No	Stable and healthy housing	Not needing a social assistance	No	No	No	No	No	No	0	No	No	No	No	No	No	0	No	No	No	No	No	No	No
305	Selected	2003-10-31	female	2019-08-07	1	15.7673	1	0	No	No	Full Health insurance (including a top-up policy)	No	Stable and healthy housing	Not needing a social assistance	No	No	No	No	No	No	0	No	No	No	No	No	No	0	No	No	No	No	No	No	No
306	Selected	2010-06-11	male	2019-08-07	1	9.15537	1	0	No	No	Full Health insurance (including a top-up policy)	No	Stable and healthy housing	Not needing a social assistance	No	No	No	No	No	No	1	No	Yes	No	No	No	No	0	No	No	No	No	No	No	No
307	Selected	2005-01-15	male	2019-08-07	1	14.5572	1	5	No	No	Full Health insurance (including a top-up policy)	No	Stable and healthy housing	Not needing a social assistance	Yes	No	No	No	No	No	0	No	No	No	No	No	No	0	No	No	No	No	No	No	No
308	Selected	2012-01-25	male	2019-08-07	1	7.53183	1	4	No	No	Complete health insurance for deprived citizens	No	Stable and healthy housing	Not needing a social assistance	No	No	No	No	No	No	3	No	Yes	No	Yes	Yes	No	1	No	No	No	No	No	Yes	No
309	Selected	2012-11-26	male	2019-08-07	1	6.69405	1	4	No	No	Complete health insurance for deprived citizens	No	Stable and healthy housing	Not needing a social assistance	No	No	No	No	No	No	0	No	No	No	No	No	No	0	No	No	No	No	No	No	No
310	Selected	2012-06-25	male	2019-08-08	1	7.11567	1	0	No	No	Full Health insurance (including a top-up policy)	No	Stable and healthy housing	Not needing a social assistance	No	No	No	No	No	No	0	No	No	No	No	No	No	0	No	No	No	No	No	No	No
311	Selected	2011-07-15	female	2019-08-08	1	8.06571	1	28	No	No	Incomplete health insurance	No	Stable and healthy housing	Needing social assistance	Yes	No	No	No	No	No	1	Yes	No	No	No	No	No	1	No	Yes	No	No	No	No	No
312	Selected	2007-03-27	female	2019-08-08	1	12.3669	1	15	No	No	Complete health insurance for deprived citizens	No	Stable and healthy housing	Needing social assistance	Yes	No	No	No	No	No	1	No	No	No	Yes	No	No	0	No	No	No	No	No	No	No
313	Selected	2013-01-31	female	2019-08-08	1	6.51609	1	0	No	No	Full Health insurance (including a top-up policy)	No	Stable and healthy housing	Not needing a social assistance	No	No	No	No	No	No	0	No	No	No	No	No	No	0	No	No	No	No	No	No	No
314	Selected	2010-10-09	female	2019-08-08	1	8.82957	1	9	No	No	Complete health insurance for deprived citizens	No	Stable and healthy housing	Not needing a social assistance	Yes	No	No	No	No	No	0	No	No	No	No	No	No	0	No	No	No	No	No	No	No
315	Selected	2008-06-24	male	2019-08-08	1	11.1212	1	0	No	No	Full Health insurance (including a top-up policy)	No	Stable and healthy housing	Not needing a social assistance	No	No	No	No	No	No	0	No	No	No	No	No	No	0	No	No	No	No	No	No	No
316	Selected	2013-02-25	female	2019-08-08	1	6.44764	1	0	No	No	Full Health insurance (including a top-up policy)	No	Stable and healthy housing	Not needing a social assistance	No	No	No	No	No	No	0	No	No	No	No	No	No	0	No	No	No	No	No	No	No
317	Selected	2006-01-09	male	2019-08-08	1	13.577	1	5	No	No	Full Health insurance (including a top-up policy)	No	Stable and healthy housing	Not needing a social assistance	Yes	No	No	No	No	No	0	No	No	No	No	No	No	0	No	No	No	No	No	No	No
318	Selected	2005-07-24	male	2019-08-09	1	14.0397	1	5	No	No	Full Health insurance (including a top-up policy)	No	Stable and healthy housing	Not needing a social assistance	Yes	No	No	No	No	No	2	No	Yes	No	Yes	No	No	1	No	No	No	Yes	No	No	No
319	Selected	2015-01-04	male	2019-08-09	1	4.59411	1	0	No	No	Full Health insurance (including a top-up policy)	No	Stable and healthy housing	Not needing a social assistance	No	No	No	No	No	No	0	No	No	No	No	No	No	0	No	No	No	No	No	No	No
320	Selected	2016-07-10	female	2019-08-09	1	3.08008	1	17	No	No	Incomplete health insurance	No	Stable and healthy housing	Not needing a social assistance	No	No	No	No	No	No	0	No	No	No	No	No	No	0	No	No	No	No	No	No	No
321	Selected	2010-04-04	female	2019-08-09	1	9.34702	1	0	No	No	Full Health insurance (including a top-up policy)	No	Stable and healthy housing	Not needing a social assistance	No	No	No	No	No	No	0	No	No	No	No	No	No	0	No	No	No	No	No	No	No
322	Selected	2015-11-17	male	2019-08-09	1	3.72621	1	30	No	No	Complete health insurance for deprived citizens	No	Unhealthy housing	Not needing a social assistance	No	No	Yes	No	No	No	2	No	Yes	No	No	No	Yes	0	No	No	No	No	No	No	No
323	Selected	2004-06-13	female	2019-08-09	1	15.154	1	9	No	No	Complete health insurance for deprived citizens	No	Stable and healthy housing	Not needing a social assistance	Yes	No	No	No	No	No	2	No	No	No	Yes	Yes	No	0	No	No	No	No	No	No	No
324	Selected	2010-02-20	male	2019-08-09	1	9.46475	1	5	No	No	Full Health insurance (including a top-up policy)	No	Stable and healthy housing	Not needing a social assistance	Yes	No	No	Yes	No	No	0	No	No	No	No	No	No	0	No	No	No	No	No	No	No
325	Selected	2015-03-24	male	2019-08-09	1	4.37782	1	0	No	No	Full Health insurance (including a top-up policy)	No	Stable and healthy housing	Not needing a social assistance	No	No	No	No	No	No	0	No	No	No	No	No	No	0	No	No	No	No	No	No	No
326	Selected	2011-10-23	male	2019-08-09	1	7.79466	1	20	No	No	Full Health insurance (including a top-up policy)	No	Stable and healthy housing	Needing social assistance	Yes	No	Yes	Yes	No	No	4	No	Yes	No	Yes	Yes	Yes	0	No	No	No	No	No	No	No
327	Selected	2008-06-17	female	2019-08-09	1	11.1431	1	23	No	Yes	Complete health insurance for deprived citizens	No	Stable and healthy housing	Not needing a social assistance	Yes	No	No	No	No	No	3	No	Yes	No	Yes	Yes	No	0	No	No	No	No	No	No	No
328	Selected	2011-06-07	male	2019-08-12	1	8.17248	1	0	No	No	Full Health insurance (including a top-up policy)	No	Stable and healthy housing	Not needing a social assistance	No	No	No	No	No	No	0	No	No	No	No	No	No	0	No	No	No	No	No	No	No
329	Selected	2016-05-17	male	2019-08-12	1	3.23614	1	42	No	No	Complete health insurance for deprived citizens	No	Unhealthy housing	Needing social assistance without knowing how to get this	No	Yes	No	No	Yes	Yes	3	No	Yes	No	Yes	No	Yes	0	No	No	No	No	No	No	No
330	Selected	2008-06-03	female	2019-08-12	1	11.1896	1	0	No	No	Full Health insurance (including a top-up policy)	No	Stable and healthy housing	Not needing a social assistance	No	No	No	No	No	No	0	No	No	No	No	No	No	0	No	No	No	No	No	No	No
331	Selected	2010-06-02	female	2019-08-12	1	9.1937	1	0	No	No	Full Health insurance (including a top-up policy)	No	Stable and healthy housing	Not needing a social assistance	No	No	No	No	No	No	0	No	No	No	No	No	No	0	No	No	No	No	No	No	No
332	Selected	2007-08-25	female	2019-08-12	1	11.9644	1	0	No	No	Full Health insurance (including a top-up policy)	No	Stable and healthy housing	Not needing a social assistance	No	No	No	No	No	No	0	No	No	No	No	No	No	0	No	No	No	No	No	No	No
333	Selected	2013-01-10	male	2019-08-12	1	6.58453	1	0	No	No	Full Health insurance (including a top-up policy)	No	Stable and healthy housing	Not needing a social assistance	No	No	No	No	No	No	0	No	No	No	No	No	No	0	No	No	No	No	No	No	No
334	Selected	2013-11-25	female	2019-08-12	1	5.71116	1	0	No	No	Full Health insurance (including a top-up policy)	No	Stable and healthy housing	Not needing a social assistance	No	No	No	No	No	No	0	No	No	No	No	No	No	0	No	No	No	No	No	No	No
335	Selected	2008-02-16	male	2019-08-12	1	11.4853	1	14	No	No	Full Health insurance (including a top-up policy)	No	Stable and healthy housing	Not needing a social assistance	Yes	No	Yes	No	No	No	0	No	No	No	No	No	No	0	No	No	No	No	No	No	No
336	Selected	2014-10-03	male	2019-08-13	1	4.85695	1	17	No	No	Full Health insurance (including a top-up policy)	No	Unhealthy housing	Not needing a social assistance	No	No	No	No	No	No	1	No	Yes	No	No	No	No	0	No	No	No	No	No	No	No
337	Selected	2013-04-22	female	2019-08-13	1	6.30801	1	78	No	Yes	No health insurance (even if enrollment in progress or insurance abroad)	Yes	Unstable housing (temporary social housing or housed by relatives, slums)	Not needing a social assistance	Yes	Yes	No	Yes	No	Yes	5	Yes	Yes	Yes	Yes	Yes	No	2	No	Yes	Yes	No	No	No	Yes
338	Selected	2010-04-06	female	2019-08-13	1	9.3525	1	0	No	No	Full Health insurance (including a top-up policy)	No	Stable and healthy housing	Not needing a social assistance	No	No	No	No	No	No	0	No	No	No	No	No	No	0	No	No	No	No	No	No	No
339	Selected	2005-07-06	male	2019-08-13	1	14.1027	1	4	No	No	Complete health insurance for deprived citizens	No	Stable and healthy housing	Not needing a social assistance	No	No	No	No	No	No	2	Yes	No	No	Yes	No	No	0	No	No	No	No	No	No	No
340	Selected	2012-07-17	male	2019-08-13	1	7.07187	1	0	No	No	Full Health insurance (including a top-up policy)	No	Stable and healthy housing	Not needing a social assistance	No	No	No	No	No	No	0	No	No	No	No	No	No	0	No	No	No	No	No	No	No
341	Selected	2009-12-31	male	2019-08-13	1	9.61533	1	0	No	No	Full Health insurance (including a top-up policy)	No	Stable and healthy housing	Not needing a social assistance	No	No	No	No	No	No	0	No	No	No	No	No	No	0	No	No	No	No	No	No	No
342	Selected	2010-03-02	male	2019-08-13	1	9.44832	1	4	No	No	Complete health insurance for deprived citizens	No	Stable and healthy housing	Not needing a social assistance	No	No	No	No	No	No	1	No	Yes	No	No	No	No	0	No	No	No	No	No	No	No
343	Selected	2008-07-19	male	2019-08-13	1	11.0664	1	9	No	No	Complete health insurance for deprived citizens	No	Stable and healthy housing	Not needing a social assistance	Yes	No	No	No	No	No	0	No	No	No	No	No	No	0	No	No	No	No	No	No	No
344	Selected	2010-07-07	female	2019-08-23	1	9.10062	1	0	No	No	Full Health insurance (including a top-up policy)	No	Stable and healthy housing	Not needing a social assistance	No	No	No	No	No	No	0	No	No	No	No	No	No	0	No	No	No	No	No	No	No
345	Selected	2004-02-20	female	2019-08-23	1	15.5044	1	22	No	No	Incomplete health insurance	No	Stable and healthy housing	Not needing a social assistance	Yes	No	No	No	No	No	0	No	No	No	No	No	No	0	No	No	No	No	No	No	No
346	Selected	2011-04-18	female	2019-08-23	1	8.34771	1	0	No	No	Full Health insurance (including a top-up policy)	No	Stable and healthy housing	Not needing a social assistance	No	No	No	No	No	No	1	No	No	No	No	No	Yes	0	No	No	No	No	No	No	No
347	Not Selected	2016-08-04	male	2019-08-23	1	3.04997	0		No	No	Full Health insurance (including a top-up policy)	No	Stable and healthy housing	Not needing a social assistance	No	No	No	No	No		0	No	No	No	No	No	No	0	No	No	No	No	No	No	No
348	Selected	2012-03-14	male	2019-08-23	1	7.44148	1	4	No	No	Complete health insurance for deprived citizens	No	Stable and healthy housing	Not needing a social assistance	No	No	No	No	No	No	0	No	No	No	No	No	No	0	No	No	No	No	No	No	No
349	Selected	2008-03-11	male	2019-08-23	1	11.4497	1	4	No	No	Complete health insurance for deprived citizens	No	Stable and healthy housing	Not needing a social assistance	No	No	No	No	No	No	0	No	No	No	No	No	No	0	No	No	No	No	No	No	No
350	Selected	2014-03-20	female	2019-08-23	1	5.42642	1	0	No	No	Full Health insurance (including a top-up policy)	No	Stable and healthy housing	Not needing a social assistance	No	No	No	No	No	No	0	No	No	No	No	No	No	0	No	No	No	No	No	No	No
351	Selected	2016-03-17	male	2019-08-23	1	3.43327	1	29	No	No	Complete health insurance for undocumented migrants	No	Stable and healthy housing	Needing social assistance	Yes	No	Yes	No	No	No	1	No	No	No	No	No	Yes	0	No	No	No	No	No	No	No
352	Selected	2012-02-15	female	2019-08-23	1	7.51814	1	10	No	No	Complete health insurance for deprived citizens	No	Stable and healthy housing	Needing social assistance	No	No	No	No	No	No	1	No	No	No	No	No	Yes	0	No	No	No	No	No	No	No
353	Selected	2006-01-20	male	2019-08-23	1	13.588	1	9	No	No	Full Health insurance (including a top-up policy)	No	Stable and healthy housing	Not needing a social assistance	No	No	Yes	No	No	No	0	No	No	No	No	No	No	0	No	No	No	No	No	No	No
354	Selected	2015-08-29	female	2019-08-23	1	3.98357	1	5	No	No	Full Health insurance (including a top-up policy)	No	Stable and healthy housing	Not needing a social assistance	Yes	No	No	No	No	No	0	No	No	No	No	No	No	0	No	No	No	No	No	No	No
355	Selected	2013-11-12	female	2019-08-26	1	5.77686	1	22	No	No	Full Health insurance (including a top-up policy)	No	Unhealthy housing	Not needing a social assistance	Yes	No	No	No	No	No	2	No	Yes	No	No	Yes	No	1	No	No	No	Yes	No	No	No
356	Selected	2010-06-05	male	2019-08-26	1	9.22382	1	9	No	No	Complete health insurance for deprived citizens	No	Stable and healthy housing	Not needing a social assistance	Yes	No	No	No	No	No	1	No	Yes	No	No	No	No	0	No	No	No	No	No	No	No
357	Selected	2007-04-16	male	2019-08-26	1	12.3614	1	9	No	No	Complete health insurance for deprived citizens	No	Stable and healthy housing	Not needing a social assistance	Yes	No	No	No	No	No	0	No	No	No	No	No	No	0	No	No	No	No	No	No	No
358	Selected	2011-06-29	male	2019-08-26	1	8.15879	1	0	No	No	Full Health insurance (including a top-up policy)	No	Stable and healthy housing	Not needing a social assistance	No	No	No	No	No	No	0	No	No	No	No	No	No	0	No	No	No	No	No	No	No
359	Selected	2010-12-31	female	2019-08-26	1	8.65161	1	0	No	No	Full Health insurance (including a top-up policy)	No	Stable and healthy housing	Not needing a social assistance	No	No	No	No	No	No	0	No	No	No	No	No	No	0	No	No	No	No	No	No	No
360	Selected	2011-08-28	female	2019-08-28	1	7.99452	1	4	No	No	Complete health insurance for deprived citizens	No	Stable and healthy housing	Not needing a social assistance	No	No	No	No	No	No	0	No	No	No	No	No	No	0	No	No	No	No	No	No	No
361	Selected	2013-01-05	female	2019-08-27	1	6.64203	1	0	No	No	Full Health insurance (including a top-up policy)	No	Stable and healthy housing	Not needing a social assistance	No	No	No	No	No	No	0	No	No	No	No	No	No	0	No	No	No	No	No	No	No
362	Selected	2004-04-12	female	2019-08-27	1	15.373	1	0	No	No	Full Health insurance (including a top-up policy)	No	Stable and healthy housing	Not needing a social assistance	No	No	No	No	No	No	0	No	No	No	No	No	No	0	No	No	No	No	No	No	No
363	Selected	2013-11-20	female	2019-08-27	1	5.76591	1	13	No	No	Complete health insurance for deprived citizens	No	Stable and healthy housing	Not needing a social assistance	No	No	Yes	No	No	No	0	No	No	No	No	No	No	0	No	No	No	No	No	No	No
364	Selected	2012-12-03	male	2019-08-27	1	6.72964	1	9	No	No	Full Health insurance (including a top-up policy)	No	Stable and healthy housing	Not needing a social assistance	No	No	Yes	No	No	No	0	No	No	No	No	No	No	0	No	No	No	No	No	No	No
365	Selected	2004-05-25	male	2019-08-27	1	15.2553	1	0	No	No	Full Health insurance (including a top-up policy)	No	Stable and healthy housing	Not needing a social assistance	No	No	No	No	No	No	1	Yes	No	No	No	No	No	0	No	No	No	No	No	No	No
366	Selected	2010-12-20	male	2019-08-27	1	8.68446	1	4	No	No	Complete health insurance for deprived citizens	No	Stable and healthy housing	Not needing a social assistance	No	No	No	No	No	No	0	No	No	No	No	No	No	0	No	No	No	No	No	No	No
367	Selected	2012-07-26	male	2019-08-27	1	7.08556	1	0	No	No	Full Health insurance (including a top-up policy)	No	Stable and healthy housing	Not needing a social assistance	No	No	No	No	No	No	0	No	No	No	No	No	No	0	No	No	No	No	No	No	No
368	Selected	2012-11-26	female	2019-08-27	1	6.7488	1	37	No	No	Complete health insurance for deprived citizens	No	Unhealthy housing	Needing social assistance	No	Yes	No	No	No	Yes	2	No	Yes	No	Yes	No	No	1	No	No	No	No	Yes	No	No
369	Selected	2010-09-07	female	2019-08-27	1	8.9692	1	15	No	No	Complete health insurance for deprived citizens	No	Stable and healthy housing	Needing social assistance	Yes	No	No	No	No	No	2	No	No	No	Yes	Yes	No	1	No	No	No	No	Yes	No	No
370	Selected	2010-06-02	male	2019-08-27	1	9.23477	1	0	No	No	Full Health insurance (including a top-up policy)	No	Stable and healthy housing	Not needing a social assistance	No	No	No	No	No	No	0	No	No	No	No	No	No	0	No	No	No	No	No	No	No
371	Selected	2009-10-28	male	2019-08-28	1	9.82888	1	0	No	No	Full Health insurance (including a top-up policy)	No	Stable and healthy housing	Not needing a social assistance	No	No	No	No	No	No	0	No	No	No	No	No	No	0	No	No	No	No	No	No	No
372	Selected	2004-10-05	female	2019-08-28	1	14.8939	1	0	No	No	Full Health insurance (including a top-up policy)	No	Stable and healthy housing	Not needing a social assistance	No	No	No	No	No	No	3	No	No	No	Yes	Yes	Yes	0	No	No	No	No	No	No	No
373	Selected	2009-12-10	female	2019-08-28	1	9.7139	1	0	No	No	Full Health insurance (including a top-up policy)	No	Stable and healthy housing	Not needing a social assistance	No	No	No	No	No	No	0	No	No	No	No	No	No	0	No	No	No	No	No	No	No
374	Selected	2015-03-10	female	2019-08-28	1	4.46817	1	0	No	No	Full Health insurance (including a top-up policy)	No	Stable and healthy housing	Not needing a social assistance	No	No	No	No	No	No	1	No	No	No	No	No	Yes	0	No	No	No	No	No	No	No
375	Selected	2014-02-13	male	2019-08-28	1	5.53593	1	2	No	No	Full Health insurance (including a top-up policy)	No	Stable and healthy housing	Not needing a social assistance	No	No	No	No	Yes	No	0	No	No	No	No	No	No	0	No	No	No	No	No	No	No
376	Selected	2014-05-10	female	2019-08-28	1	5.30048	1	9	No	No	Full Health insurance (including a top-up policy)	No	Stable and healthy housing	Not needing a social assistance	No	No	Yes	No	No	No	1	No	No	No	No	No	Yes	0	No	No	No	No	No	No	No
377	Selected	2014-06-30	male	2019-08-28	1	5.16085	1	6	No	No	Complete health insurance for deprived citizens	No	Stable and healthy housing	Not needing a social assistance	No	No	No	No	Yes	No	0	No	No	No	No	No	No	0	No	No	No	No	No	No	No
378	Selected	2016-06-24	male	2019-08-28	1	3.17591	1	10	No	No	Complete health insurance for deprived citizens	No	Stable and healthy housing	Needing social assistance	No	No	No	No	No	No	1	No	No	No	Yes	No	No	0	No	No	No	No	No	No	No
379	Selected	2015-10-05	female	2019-08-30	1	3.89596	1	19	No	No	Complete health insurance for undocumented migrants	No	Stable and healthy housing	Not needing a social assistance	No	Yes	No	No	Yes	No	1	No	No	No	Yes	No	No	0	No	No	No	No	No	No	No
380	Selected	2012-09-19	female	2019-08-30	1	6.94319	1	0	No	No	Full Health insurance (including a top-up policy)	No	Stable and healthy housing	Not needing a social assistance	No	No	No	No	No	No	0	No	No	No	No	No	No	0	No	No	No	No	No	No	No
381	Selected	2011-01-30	male	2019-08-30	1	8.58042	1	4	No	No	Complete health insurance for deprived citizens	No	Stable and healthy housing	Not needing a social assistance	No	No	No	No	No	No	1	No	No	No	Yes	No	No	0	No	No	No	No	No	No	No
382	Selected	2010-11-22	female	2019-08-30	1	8.76934	1	0	No	No	Full Health insurance (including a top-up policy)	No	Stable and healthy housing	Not needing a social assistance	No	No	No	No	No	No	0	No	No	No	No	No	No	0	No	No	No	No	No	No	No
383	Selected	2006-07-04	female	2019-08-30	1	13.1554	1	15	No	No	Complete health insurance for deprived citizens	No	Stable and healthy housing	Needing social assistance	Yes	No	No	No	No	No	0	No	No	No	No	No	No	0	No	No	No	No	No	No	No
384	Selected	2011-09-07	female	2019-08-30	1	7.9781	1	30	No	No	Complete health insurance for deprived citizens	No	Unhealthy housing	Not needing a social assistance	No	No	Yes	No	No	No	2	No	Yes	No	No	No	Yes	0	No	No	No	No	No	No	No
385	Selected	2005-08-21	male	2019-08-30	1	14.0233	1	36	No	No	Complete health insurance for deprived citizens	No	Unhealthy housing	Needing social assistance	No	No	Yes	Yes	No	No	3	No	Yes	No	Yes	No	Yes	0	No	No	No	No	No	No	No
386	Selected	2007-05-22	male	2019-09-02	1	12.2738	1	0	No	No	Full Health insurance (including a top-up policy)	No	Stable and healthy housing	Not needing a social assistance	No	No	No	No	No	No	0	No	No	No	No	No	No	0	No	No	No	No	No	No	No
387	Selected	2014-10-16	male	2019-09-02	1	4.87885	1	0	No	No	Full Health insurance (including a top-up policy)	No	Stable and healthy housing	Not needing a social assistance	No	No	No	No	No	No	0	No	No	No	No	No	No	0	No	No	No	No	No	No	No
388	Selected	2011-06-25	female	2019-09-02	1	8.18891	1	5	No	No	Full Health insurance (including a top-up policy)	No	Stable and healthy housing	Not needing a social assistance	Yes	No	No	No	No	No	0	No	No	No	No	No	No	0	No	No	No	No	No	No	No
389	Selected	2011-03-15	male	2019-09-02	1	8.46817	1	14	No	No	Full Health insurance (including a top-up policy)	Yes	Stable and healthy housing	Not needing a social assistance	Yes	No	No	Yes	Yes	No	0	No	No	No	No	No	No	0	No	No	No	No	No	No	No
390	Selected	2012-08-19	male	2019-09-03	1	7.03628	1	0	No	No	Full Health insurance (including a top-up policy)	No	Stable and healthy housing	Not needing a social assistance	No	No	No	No	No	No	0	No	No	No	No	No	No	0	No	No	No	No	No	No	No
391	Selected	2006-10-30	male	2019-09-03	1	12.8433	1	0	No	No	Full Health insurance (including a top-up policy)	No	Stable and healthy housing	Not needing a social assistance	No	No	No	No	No	No	0	No	No	No	No	No	No	0	No	No	No	No	No	No	No
392	Selected	2016-02-05	male	2019-09-03	1	3.57563	1	0	No	No	Full Health insurance (including a top-up policy)	No	Stable and healthy housing	Not needing a social assistance	No	No	No	No	No	No	0	No	No	No	No	No	No	0	No	No	No	No	No	No	No
393	Selected	2010-05-12	male	2019-09-03	1	9.31143	1	5	No	No	Full Health insurance (including a top-up policy)	No	Stable and healthy housing	Not needing a social assistance	Yes	No	No	No	No	No	0	No	No	No	No	No	No	0	No	No	No	No	No	No	No
394	Selected	2010-08-02	female	2019-09-03	1	9.08693	1	5	No	No	Full Health insurance (including a top-up policy)	No	Stable and healthy housing	Not needing a social assistance	Yes	No	No	No	No	No	0	No	No	No	No	No	No	0	No	No	No	No	No	No	No
395	Selected	2004-05-02	male	2019-09-03	1	15.3374	1	5	No	No	Full Health insurance (including a top-up policy)	No	Stable and healthy housing	Not needing a social assistance	Yes	No	No	Yes	No	No	1	No	No	No	No	Yes	No	0	No	No	No	No	No	No	No
396	Selected	2008-01-02	male	2019-09-03	1	11.6687	1	10	No	No	Complete health insurance for deprived citizens	No	Stable and healthy housing	Needing social assistance	No	No	No	No	No	No	1	No	No	No	No	No	Yes	0	No	No	No	No	No	No	No
397	Selected	2004-10-29	male	2019-09-03	1	14.8446	1	0	No	No	Full Health insurance (including a top-up policy)	No	Stable and healthy housing	Not needing a social assistance	No	No	No	No	No	No	0	No	No	No	No	No	No	0	No	No	No	No	No	No	No
398	Selected	2009-07-20	male	2019-09-03	1	10.1218	1	5	No	No	Full Health insurance (including a top-up policy)	No	Stable and healthy housing	Not needing a social assistance	Yes	No	No	No	No	No	0	No	No	No	No	No	No	0	No	No	No	No	No	No	No
399	Selected	2015-03-07	female	2019-09-03	1	4.49281	1	9	No	No	Complete health insurance for undocumented migrants	No	Stable and healthy housing	Not needing a social assistance	No	No	No	No	No	No	1	No	No	No	No	No	Yes	1	No	Yes	No	No	No	No	No
400	Selected	2005-07-29	male	2019-09-03	1	14.0972	1	22	No	No	Complete health insurance for deprived citizens	No	Stable and healthy housing	Needing social assistance without knowing how to get this	No	No	Yes	No	No	No	0	No	No	No	No	No	No	0	No	No	No	No	No	No	No
401	Selected	2011-02-11	female	2019-09-04	1	8.55852	1	0	No	No	Full Health insurance (including a top-up policy)	No	Stable and healthy housing	Not needing a social assistance	No	No	No	No	No	No	0	No	No	No	No	No	No	0	No	No	No	No	No	No	No
402	Selected	2010-08-15	male	2019-09-04	1	9.05407	1	30	No	No	Incomplete health insurance	No	Stable and healthy housing	Not needing a social assistance	Yes	Yes	No	No	No	No	1	Yes	No	No	No	No	No	0	No	No	No	No	No	No	No
403	Selected	2004-11-14	female	2019-09-04	1	14.8036	1	5	No	No	Full Health insurance (including a top-up policy)	No	Stable and healthy housing	Not needing a social assistance	Yes	No	No	No	No	No	2	No	No	No	Yes	No	Yes	0	No	No	No	No	No	No	No
404	Selected	2007-07-03	male	2019-09-04	1	12.1725	1	4	No	No	Complete health insurance for deprived citizens	No	Stable and healthy housing	Not needing a social assistance	No	No	No	No	No	No	0	No	No	No	No	No	No	0	No	No	No	No	No	No	No
405	Selected	2005-09-02	female	2019-09-04	1	14.0041	1	0	No	No	Full Health insurance (including a top-up policy)	No	Stable and healthy housing	Not needing a social assistance	No	No	No	No	No	No	0	No	No	No	No	No	No	0	No	No	No	No	No	No	No
406	Selected	2013-05-13	female	2019-09-04	1	6.31075	1	0	No	No	Full Health insurance (including a top-up policy)	No	Stable and healthy housing	Not needing a social assistance	No	No	No	No	No	No	0	No	No	No	No	No	No	0	No	No	No	No	No	No	No
407	Selected	2006-09-11	female	2019-09-04	1	12.9802	1	18	No	No	Complete health insurance for deprived citizens	No	Stable and healthy housing	Not needing a social assistance	Yes	No	Yes	No	No	No	1	No	No	No	No	No	Yes	0	No	No	No	No	No	No	No
408	Selected	2016-02-06	male	2019-09-05	1	3.57563	1	4	No	No	Complete health insurance for deprived citizens	No	Stable and healthy housing	Not needing a social assistance	No	No	No	No	No	No	0	No	No	No	No	No	No	0	No	No	No	No	No	No	No
409	Selected	2004-11-05	female	2019-09-05	1	14.8309	1	0	No	No	Full Health insurance (including a top-up policy)	No	Stable and healthy housing	Not needing a social assistance	No	No	No	No	No	No	0	No	No	No	No	No	No	0	No	No	No	No	No	No	No
410	Selected	2009-01-07	male	2019-09-04	1	10.6585	1	17	No	No	Complete health insurance for deprived citizens	No	Stable and healthy housing	Needing social assistance	Yes	No	No	No	Yes	No	1	No	No	No	Yes	No	No	0	No	No	No	No	No	No	No
411	Selected	2003-09-30	female	2019-09-05	1	15.9288	1	0	No	No	Full Health insurance (including a top-up policy)	No	Stable and healthy housing	Not needing a social assistance	No	No	No	No	No	No	0	No	No	No	No	No	No	0	No	No	No	No	No	No	No
412	Selected	2007-09-18	female	2019-09-05	1	11.9644	1	0	No	No	Full Health insurance (including a top-up policy)	No	Stable and healthy housing	Not needing a social assistance	No	No	No	No	No	No	0	No	No	No	No	No	No	0	No	No	No	No	No	No	No
413	Selected	2010-06-28	female	2019-09-05	1	9.18823	1	0	No	No	Full Health insurance (including a top-up policy)	No	Stable and healthy housing	Not needing a social assistance	No	No	No	No	No	No	0	No	No	No	No	No	No	0	No	No	No	No	No	No	No
414	Selected	2015-12-05	female	2019-09-05	1	3.75086	1	4	No	No	Complete health insurance for deprived citizens	No	Stable and healthy housing	Not needing a social assistance	No	No	No	No	No	No	0	No	No	No	No	No	No	0	No	No	No	No	No	No	No
415	Selected	2008-11-21	male	2019-09-05	1	10.7871	1	0	No	No	Full Health insurance (including a top-up policy)	No	Stable and healthy housing	Not needing a social assistance	No	No	No	No	No	No	1	No	No	No	No	Yes	No	0	No	No	No	No	No	No	No
416	Selected	2011-06-09	male	2019-09-06	1	8.24093	1	4	No	No	Complete health insurance for deprived citizens	No	Stable and healthy housing	Not needing a social assistance	No	No	No	No	No	No	0	No	No	No	No	No	No	0	No	No	No	No	No	No	No
417	Selected	2015-06-23	male	2019-09-06	1	4.20534	1	13	No	No	Complete health insurance for deprived citizens	No	Stable and healthy housing	Not needing a social assistance	No	No	Yes	No	No	No	1	No	No	No	No	No	Yes	0	No	No	No	No	No	No	No
418	Selected	2016-02-20	male	2019-09-06	1	3.54278	1	25	No	No	Complete health insurance for deprived citizens	Yes	Stable and healthy housing	Needing social assistance	No	Yes	No	No	No	No	4	Yes	No	Yes	Yes	No	Yes	0	No	No	No	No	No	No	No
419	Selected	2012-04-26	male	2019-09-06	1	7.36208	1	10	No	No	Complete health insurance for deprived citizens	No	Stable and healthy housing	Needing social assistance	No	No	No	No	No	No	0	No	No	No	No	No	No	0	No	No	No	No	No	No	No
420	Selected	2015-02-26	female	2019-09-06	1	4.52567	1	111	Yes	Yes	No health insurance (even if enrollment in progress or insurance abroad)	Yes	Homelessness	Needing social assistance without knowing how to get this	No	Yes	Yes	No	Yes	Yes	5	Yes	Yes	Yes	Yes	No	Yes	5	Yes	Yes	Yes	No	Yes	Yes	Yes
421	Selected	2016-01-05	female	2019-09-06	1	3.66872	1	4	No	No	Complete health insurance for deprived citizens	No	Stable and healthy housing	Not needing a social assistance	No	No	No	No	No	No	0	No	No	No	No	No	No	0	No	No	No	No	No	No	No
422	Selected	2013-11-10	female	2019-09-09	1	5.82067	1	11	No	No	Full Health insurance (including a top-up policy)	No	Stable and healthy housing	Needing social assistance without knowing how to get this	No	No	No	No	Yes	No	0	No	No	No	No	No	No	0	No	No	No	No	No	No	No
423	Selected	2010-04-29	male	2019-09-09	1	9.36345	1	0	No	No	Full Health insurance (including a top-up policy)	No	Stable and healthy housing	Not needing a social assistance	No	No	No	No	No	No	0	No	No	No	No	No	No	0	No	No	No	No	No	No	No
424	Selected	2007-03-28	female	2019-09-09	1	12.4517	1	26	No	No	Full Health insurance (including a top-up policy)	No	Unhealthy housing	Not needing a social assistance	No	No	Yes	No	No	No	2	No	Yes	No	No	No	Yes	0	No	No	No	No	No	No	No
425	Selected	2006-11-30	female	2019-09-09	1	12.7748	1	5	No	No	Full Health insurance (including a top-up policy)	No	Stable and healthy housing	Not needing a social assistance	Yes	No	No	No	No	No	1	No	No	No	No	Yes	No	0	No	No	No	No	No	No	No
426	Selected	2005-05-03	male	2019-09-09	1	14.3518	1	0	No	No	Full Health insurance (including a top-up policy)	No	Stable and healthy housing	Not needing a social assistance	No	No	No	No	No	No	0	No	No	No	No	No	No	0	No	No	No	No	No	No	No
427	Selected	2011-03-27	male	2019-09-10	1	8.45448	1	15	No	No	Full Health insurance (including a top-up policy)	No	Stable and healthy housing	Needing social assistance	No	No	Yes	No	No	No	1	No	No	No	No	No	Yes	0	No	No	No	No	No	No	No
428	Selected	2013-09-24	female	2019-09-10	1	5.9603	1	0	No	No	Full Health insurance (including a top-up policy)	No	Stable and healthy housing	Not needing a social assistance	No	No	No	No	No	No	0	No	No	No	No	No	No	0	No	No	No	No	No	No	No
429	Selected	2014-10-21	male	2019-09-10	1	4.88706	1	0	No	No	Full Health insurance (including a top-up policy)	No	Stable and healthy housing	Not needing a social assistance	No	No	No	No	No	No	0	No	No	No	No	No	No	0	No	No	No	No	No	No	No
430	Selected	2006-02-13	female	2019-09-10	1	13.5715	1	28	No	No	Full Health insurance (including a top-up policy)	No	Unhealthy housing	Needing social assistance without knowing how to get this	No	No	No	No	No	Yes	1	No	No	No	No	No	Yes	0	No	No	No	No	No	No	No
431	Selected	2013-08-30	male	2019-09-10	1	6.02875	1	6	No	No	Full Health insurance (including a top-up policy)	No	Stable and healthy housing	Needing social assistance	No	No	No	No	No	No	1	No	Yes	No	No	No	No	0	No	No	No	No	No	No	No
432	Selected	2009-08-02	male	2019-09-10	1	10.1054	1	88	No	Yes	No health insurance (even if enrollment in progress or insurance abroad)	Yes	Unstable housing (temporary social housing or housed by relatives, slums)	Needing social assistance	No	Yes	Yes	No	Yes	No	5	Yes	Yes	Yes	Yes	No	Yes	4	Yes	Yes	Yes	No	Yes	No	Yes
433	Selected	2011-06-05	male	2019-09-11	1	8.26557	1	14	No	No	Full Health insurance (including a top-up policy)	No	Stable and healthy housing	Not needing a social assistance	Yes	No	Yes	Yes	No	No	1	No	No	No	No	Yes	No	0	No	No	No	No	No	No	No
434	Selected	2005-11-23	male	2019-09-11	1	13.7988	1	9	No	No	Complete health insurance for deprived citizens	No	Stable and healthy housing	Not needing a social assistance	Yes	No	No	No	No	No	0	No	No	No	No	No	No	0	No	No	No	No	No	No	No
435	Selected	2015-02-24	male	2019-09-11	1	4.54483	1	0	No	No	Full Health insurance (including a top-up policy)	No	Stable and healthy housing	Not needing a social assistance	No	No	No	No	No	No	0	No	No	No	No	No	No	0	No	No	No	No	No	No	No
436	Selected	2006-12-04	male	2019-09-11	1	12.7693	1	0	No	No	Full Health insurance (including a top-up policy)	No	Stable and healthy housing	Not needing a social assistance	No	No	No	No	No	No	0	No	No	No	No	No	No	0	No	No	No	No	No	No	No
437	Selected	2012-05-25	female	2019-09-11	1	7.29637	1	9	No	No	Complete health insurance for deprived citizens	No	Stable and healthy housing	Not needing a social assistance	Yes	No	No	No	No	No	1	No	No	No	No	Yes	No	0	No	No	No	No	No	No	No
438	Selected	2007-04-14	male	2019-09-11	1	12.4107	1	0	No	No	Full Health insurance (including a top-up policy)	No	Stable and healthy housing	Not needing a social assistance	No	No	No	No	No	No	0	No	No	No	No	No	No	0	No	No	No	No	No	No	No
439	Selected	2008-04-26	male	2019-09-04	1	11.3758	1	43	Yes	No	Complete health insurance for deprived citizens	No	Unhealthy housing	Not needing a social assistance	Yes	No	Yes	No	No	No	3	No	Yes	No	Yes	No	Yes	1	No	No	No	Yes	No	No	No
440	Selected	2013-11-15	female	2019-09-11	1	5.82341	1	10	No	No	Complete health insurance for deprived citizens	No	Stable and healthy housing	Needing social assistance	No	No	No	No	No	No	0	No	No	No	No	No	No	0	No	No	No	No	No	No	No
441	Selected	2015-06-28	male	2019-09-12	1	4.18617	1	0	No	No	Full Health insurance (including a top-up policy)	No	Stable and healthy housing	Not needing a social assistance	No	No	No	No	No	No	0	No	No	No	No	No	No	0	No	No	No	No	No	No	No
442	Selected	2005-06-26	male	2019-09-12	1	14.2094	1	15	No	No	Complete health insurance for deprived citizens	No	Stable and healthy housing	Needing social assistance	Yes	No	No	No	No	No	2	No	No	No	Yes	Yes	No	0	No	No	No	No	No	No	No
443	Selected	2005-06-14	male	2019-09-12	1	14.245	1	0	No	No	Full Health insurance (including a top-up policy)	No	Stable and healthy housing	Not needing a social assistance	No	No	No	No	No	No	0	No	No	No	No	No	No	0	No	No	No	No	No	No	No
444	Selected	2012-02-28	male	2019-09-12	1	7.5373	1	0	No	No	Full Health insurance (including a top-up policy)	No	Stable and healthy housing	Not needing a social assistance	No	No	No	No	No	No	0	No	No	No	No	No	No	0	No	No	No	No	No	No	No
445	Selected	2005-12-23	male	2019-09-12	1	13.7194	1	41	No	No	Complete health insurance for deprived citizens	No	Unhealthy housing	Needing social assistance without knowing how to get this	No	No	Yes	No	Yes	No	2	No	Yes	No	No	No	Yes	1	No	No	No	Yes	No	No	No
446	Selected	2004-06-16	female	2019-09-12	1	15.2389	1	20	No	No	Full Health insurance (including a top-up policy)	No	Stable and healthy housing	Needing social assistance	Yes	No	Yes	Yes	No	No	2	No	No	No	Yes	Yes	No	0	No	No	No	No	No	No	No
447	Selected	2016-08-28	female	2019-09-13	1	3.03901	1	26	No	No	Full Health insurance (including a top-up policy)	No	Unhealthy housing	Not needing a social assistance	No	No	Yes	No	No	No	0	No	No	No	No	No	No	0	No	No	No	No	No	No	No
448	Selected	2012-05-10	male	2019-09-13	1	7.34292	1	15	No	No	Complete health insurance for deprived citizens	No	Stable and healthy housing	Needing social assistance	Yes	No	No	No	No	No	1	No	No	No	No	Yes	No	0	No	No	No	No	No	No	No
449	Selected	2009-02-24	female	2019-09-13	1	10.5489	1	0	No	No	Full Health insurance (including a top-up policy)	No	Stable and healthy housing	Not needing a social assistance	No	No	No	No	No	No	0	No	No	No	No	No	No	0	No	No	No	No	No	No	No
450	Selected	2013-05-14	male	2019-09-13	1	6.33265	1	0	No	No	Full Health insurance (including a top-up policy)	No	Stable and healthy housing	Not needing a social assistance	No	No	No	No	No	No	0	No	No	No	No	No	No	0	No	No	No	No	No	No	No
451	Selected	2009-03-25	female	2019-09-13	1	10.4695	1	0	No	No	Full Health insurance (including a top-up policy)	No	Stable and healthy housing	Not needing a social assistance	No	No	No	No	No	No	0	No	No	No	No	No	No	0	No	No	No	No	No	No	No
452	Selected	2006-07-15	female	2019-09-13	1	13.1636	1	5	No	No	Full Health insurance (including a top-up policy)	No	Stable and healthy housing	Not needing a social assistance	Yes	No	No	No	No	No	2	No	Yes	No	Yes	No	No	0	No	No	No	No	No	No	No
453	Selected	2015-09-16	male	2019-09-16	1	3.99179	1	0	No	No	Full Health insurance (including a top-up policy)	No	Stable and healthy housing	Not needing a social assistance	No	No	No	No	No	No	0	No	No	No	No	No	No	0	No	No	No	No	No	No	No
454	Selected	2010-10-08	male	2019-09-16	1	8.93908	1	53	No	No	No health insurance (even if enrollment in progress or insurance abroad)	No	Unstable housing (temporary social housing or housed by relatives, slums)	Not needing a social assistance	No	No	Yes	No	Yes	No	2	Yes	No	No	No	No	Yes	0	No	No	No	No	No	No	No
455	Selected	2008-03-19	male	2019-09-16	1	11.4935	1	0	No	No	Full Health insurance (including a top-up policy)	No	Stable and healthy housing	Not needing a social assistance	No	No	No	No	No	No	0	No	No	No	No	No	No	0	No	No	No	No	No	No	No
456	Selected	2013-11-18	male	2019-09-16	1	5.82615	1	0	No	No	Full Health insurance (including a top-up policy)	No	Stable and healthy housing	Not needing a social assistance	No	No	No	No	No	No	0	No	No	No	No	No	No	0	No	No	No	No	No	No	No
457	Selected	2008-05-01	female	2019-09-16	1	11.3758	1	27	No	No	Complete health insurance for deprived citizens	No	Stable and healthy housing	Needing social assistance	No	Yes	Yes	No	No	No	1	No	No	No	Yes	No	No	0	No	No	No	No	No	No	No
458	Selected	2008-04-01	female	2019-09-16	1	11.4579	1	31	No	No	Complete health insurance for deprived citizens	Yes	Stable and healthy housing	Needing social assistance	Yes	No	Yes	Yes	No	No	3	No	No	No	Yes	Yes	Yes	0	No	No	No	No	No	No	No
459	Selected	2010-07-26	female	2019-09-16	1	9.14168	1	0	No	No	Full Health insurance (including a top-up policy)	No	Stable and healthy housing	Not needing a social assistance	No	No	No	No	No	No	0	No	No	No	No	No	No	0	No	No	No	No	No	No	No
460	Selected	2013-04-16	male	2019-09-17	1	6.41752	1	4	No	No	Complete health insurance for deprived citizens	No	Stable and healthy housing	Not needing a social assistance	No	No	No	No	No	No	0	No	No	No	No	No	No	0	No	No	No	No	No	No	No
461	Selected	2015-05-11	male	2019-09-17	1	4.35318	1	6	No	No	Complete health insurance for deprived citizens	No	Stable and healthy housing	Not needing a social assistance	No	No	No	No	No	Yes	0	No	No	No	No	No	No	0	No	No	No	No	No	No	No
462	Selected	2009-10-07	female	2019-09-17	1	9.94387	1	0	No	No	Full Health insurance (including a top-up policy)	No	Stable and healthy housing	Not needing a social assistance	No	No	No	No	No	No	0	No	No	No	No	No	No	0	No	No	No	No	No	No	No
463	Selected	2015-10-15	male	2019-09-17	1	3.92334	1	0	No	No	Full Health insurance (including a top-up policy)	No	Stable and healthy housing	Not needing a social assistance	No	No	No	No	No	No	0	No	No	No	No	No	No	0	No	No	No	No	No	No	No
464	Selected	2013-09-13	male	2019-09-17	1	6.00958	1	9	No	No	Complete health insurance for deprived citizens	No	Stable and healthy housing	Not needing a social assistance	Yes	No	No	Yes	No	No	2	No	No	No	Yes	Yes	No	0	No	No	No	No	No	No	No
465	Selected	2009-05-20	male	2019-09-17	1	10.3272	1	2	No	No	Full Health insurance (including a top-up policy)	No	Stable and healthy housing	Not needing a social assistance	No	No	No	No	No	Yes	0	No	No	No	No	No	No	0	No	No	No	No	No	No	No
466	Selected	2004-05-10	male	2019-09-18	1	15.3539	1	5	No	No	Full Health insurance (including a top-up policy)	No	Stable and healthy housing	Not needing a social assistance	Yes	No	No	No	No	No	1	No	No	No	No	Yes	No	0	No	No	No	No	No	No	No
467	Selected	2016-01-24	female	2019-09-18	1	3.64955	1	4	No	No	Complete health insurance for deprived citizens	No	Stable and healthy housing	Not needing a social assistance	No	No	No	No	No	No	0	No	No	No	No	No	No	0	No	No	No	No	No	No	No
468	Selected	2015-11-22	male	2019-09-18	1	3.82204	1	22	No	No	Complete health insurance for deprived citizens	Yes	Stable and healthy housing	Needing social assistance	Yes	No	No	No	No	No	0	No	No	No	No	No	No	0	No	No	No	No	No	No	No
469	Selected	2005-10-19	female	2019-09-18	1	13.9138	1	23	No	No	Full Health insurance (including a top-up policy)	No	Unhealthy housing	Needing social assistance	No	No	No	No	No	No	1	No	Yes	No	No	No	No	0	No	No	No	No	No	No	No
470	Selected	2006-11-18	female	2019-09-18	1	12.8323	1	0	No	No	Full Health insurance (including a top-up policy)	No	Stable and healthy housing	Not needing a social assistance	No	No	No	No	No	No	0	No	No	No	No	No	No	0	No	No	No	No	No	No	No
471	Selected	2010-04-21	male	2019-09-18	1	9.40999	1	27	No	No	Complete health insurance for deprived citizens	No	Stable and healthy housing	Needing social assistance without knowing how to get this	Yes	No	Yes	No	No	No	3	No	Yes	No	No	Yes	Yes	1	No	No	No	Yes	No	No	No
472	Selected	2006-03-13	female	2019-09-19	1	13.5168	1	0	No	No	Full Health insurance (including a top-up policy)	No	Stable and healthy housing	Not needing a social assistance	No	No	No	No	No	No	0	No	No	No	No	No	No	0	No	No	No	No	No	No	No
473	Selected	2015-05-25	female	2019-09-19	1	4.32033	1	29	No	No	Complete health insurance for deprived citizens	No	Unhealthy housing	Needing social assistance	No	No	No	No	Yes	No	2	No	Yes	No	No	Yes	No	0	No	No	No	No	No	No	No
474	Selected	2009-11-15	female	2019-09-19	1	9.84257	1	15	No	No	Full Health insurance (including a top-up policy)	No	Stable and healthy housing	Needing social assistance	No	No	Yes	Yes	No	No	1	No	No	No	No	No	Yes	0	No	No	No	No	No	No	No
475	Selected	2009-08-15	female	2019-09-19	1	10.0945	1	15	No	No	Complete health insurance for deprived citizens	No	Stable and healthy housing	Needing social assistance	Yes	No	No	No	No	No	1	No	No	No	No	Yes	No	0	No	No	No	No	No	No	No
476	Selected	2008-01-07	male	2019-09-19	1	11.6988	1	0	No	No	Full Health insurance (including a top-up policy)	No	Stable and healthy housing	Not needing a social assistance	No	No	No	No	No	No	0	No	No	No	No	No	No	0	No	No	No	No	No	No	No
477	Selected	2005-03-22	male	2019-09-19	1	14.4942	1	9	No	No	Full Health insurance (including a top-up policy)	No	Stable and healthy housing	Not needing a social assistance	No	No	Yes	No	No	No	3	Yes	No	No	Yes	No	Yes	1	No	Yes	No	No	No	No	No
478	Selected	2006-03-27	male	2019-09-20	1	13.4812	1	0	No	No	Full Health insurance (including a top-up policy)	No	Stable and healthy housing	Not needing a social assistance	No	No	No	No	No	No	0	No	No	No	No	No	No	0	No	No	No	No	No	No	No
479	Selected	2015-02-12	female	2019-09-20	1	4.60233	1	4	No	No	Complete health insurance for deprived citizens	No	Stable and healthy housing	Not needing a social assistance	No	No	No	No	No	No	0	No	No	No	No	No	No	0	No	No	No	No	No	No	No
480	Selected	2016-08-11	male	2019-09-20	1	3.10746	1	9	No	No	Complete health insurance for deprived citizens	No	Stable and healthy housing	Not needing a social assistance	Yes	No	No	No	No	No	1	No	No	No	No	Yes	No	0	No	No	No	No	No	No	No
481	Selected	2007-05-21	male	2019-09-20	1	12.334	1	5	No	No	Full Health insurance (including a top-up policy)	No	Stable and healthy housing	Not needing a social assistance	Yes	No	No	No	No	No	0	No	No	No	No	No	No	0	No	No	No	No	No	No	No
482	Selected	2006-08-08	female	2019-09-20	1	13.117	1	5	No	No	Full Health insurance (including a top-up policy)	No	Stable and healthy housing	Not needing a social assistance	Yes	No	No	No	No	No	0	No	No	No	No	No	No	0	No	No	No	No	No	No	No
483	Selected	2014-09-04	male	2019-09-20	1	5.04312	1	0	No	No	Full Health insurance (including a top-up policy)	No	Stable and healthy housing	Not needing a social assistance	No	No	No	No	No	No	0	No	No	No	No	No	No	0	No	No	No	No	No	No	No
484	Selected	2015-05-12	male	2019-09-23	1	4.35866	1	15	No	No	Complete health insurance for deprived citizens	No	Stable and healthy housing	Not needing a social assistance	No	No	Yes	No	Yes	No	2	No	Yes	No	No	No	Yes	0	No	No	No	No	No	No	No
485	Selected	2010-04-18	male	2019-09-23	1	9.4319	1	0	No	No	Full Health insurance (including a top-up policy)	No	Stable and healthy housing	Not needing a social assistance	No	No	No	No	No	No	0	No	No	No	No	No	No	0	No	No	No	No	No	No	No
486	Selected	2004-08-03	female	2019-09-23	1	15.1376	1	5	No	No	Full Health insurance (including a top-up policy)	No	Stable and healthy housing	Not needing a social assistance	Yes	No	No	No	No	No	1	No	No	No	No	Yes	No	0	No	No	No	No	No	No	No
487	Selected	2005-07-16	male	2019-09-23	1	14.1875	1	0	No	No	Full Health insurance (including a top-up policy)	No	Stable and healthy housing	Not needing a social assistance	No	No	No	No	No	No	0	No	No	No	No	No	No	0	No	No	No	No	No	No	No
488	Selected	2005-03-22	female	2019-09-23	1	14.5051	1	17	Yes	No	Complete health insurance for deprived citizens	No	Stable and healthy housing	Not needing a social assistance	Yes	No	No	No	No	No	0	No	No	No	No	No	No	0	No	No	No	No	No	No	No
489	Selected	2011-05-30	male	2019-09-23	1	8.31759	1	12	No	No	Complete health insurance for deprived citizens	No	Stable and healthy housing	Not needing a social assistance	No	Yes	No	No	No	No	3	No	Yes	No	Yes	No	Yes	0	No	No	No	No	No	No	No
490	Selected	2011-04-22	male	2019-09-24	1	8.42163	1	0	No	No	Full Health insurance (including a top-up policy)	No	Stable and healthy housing	Not needing a social assistance	No	No	No	No	No	No	0	No	No	No	No	No	No	0	No	No	No	No	No	No	No
491	Selected	2004-02-17	male	2019-09-24	1	15.6003	1	0	No	No	Full Health insurance (including a top-up policy)	No	Stable and healthy housing	Not needing a social assistance	No	No	No	No	No	No	0	No	No	No	No	No	No	0	No	No	No	No	No	No	No
492	Selected	2011-11-18	female	2019-09-24	1	7.84942	1	17	No	No	Full Health insurance (including a top-up policy)	No	Unhealthy housing	Not needing a social assistance	No	No	No	Yes	No	No	1	No	Yes	No	No	No	No	0	No	No	No	No	No	No	No
493	Selected	2009-01-04	male	2019-09-24	1	10.7187	1	15	No	No	Complete health insurance for deprived citizens	No	Stable and healthy housing	Needing social assistance	Yes	No	No	No	No	No	0	No	No	No	No	No	No	0	No	No	No	No	No	No	No
494	Selected	2007-08-07	male	2019-09-24	1	12.1314	1	39	No	No	Full Health insurance (including a top-up policy)	No	Unhealthy housing	Needing social assistance without knowing how to get this	Yes	Yes	No	No	No	No	3	No	Yes	No	Yes	No	Yes	1	No	No	No	Yes	No	No	No
495	Selected	2013-10-21	female	2019-09-25	1	5.92471	1	0	No	No	Full Health insurance (including a top-up policy)	No	Stable and healthy housing	Not needing a social assistance	No	No	No	No	No	No	0	No	No	No	No	No	No	0	No	No	No	No	No	No	No
496	Selected	2015-01-19	female	2019-09-25	1	4.68173	1	21	No	No	Full Health insurance (including a top-up policy)	No	Unstable housing (temporary social housing or housed by relatives, slums)	Not needing a social assistance	Yes	No	No	Yes	No	No	1	No	No	No	No	Yes	No	0	No	No	No	No	No	No	No
497	Selected	2008-08-23	female	2019-09-25	1	11.0883	1	9	No	No	Complete health insurance for deprived citizens	No	Stable and healthy housing	Not needing a social assistance	Yes	No	No	Yes	No	No	1	No	No	No	No	Yes	No	0	No	No	No	No	No	No	No
498	Selected	2014-07-22	male	2019-09-25	1	5.17728	1	34	No	No	Complete health insurance for deprived citizens	No	Unhealthy housing	Needing social assistance	Yes	No	No	No	Yes	No	3	No	Yes	No	No	Yes	Yes	0	No	No	No	No	No	No	No
499	Selected	2012-02-14	female	2019-09-25	1	7.61123	1	11	No	No	Complete health insurance for deprived citizens	No	Stable and healthy housing	Not needing a social assistance	Yes	No	No	No	Yes	No	0	No	No	No	No	No	No	0	No	No	No	No	No	No	No
500	Selected	2010-10-20	male	2019-09-25	1	8.93087	1	0	No	No	Full Health insurance (including a top-up policy)	No	Stable and healthy housing	Not needing a social assistance	No	No	No	No	No	No	0	No	No	No	No	No	No	0	No	No	No	No	No	No	No
501	Selected	2014-07-27	male	2019-09-25	1	5.16359	1	4	No	No	Complete health insurance for deprived citizens	No	Stable and healthy housing	Not needing a social assistance	No	No	No	No	No	No	0	No	No	No	No	No	No	0	No	No	No	No	No	No	No
502	Selected	2007-10-30	male	2019-09-26	1	11.9042	1	8	Yes	No	Full Health insurance (including a top-up policy)	No	Stable and healthy housing	Not needing a social assistance	No	No	No	No	No	No	0	No	No	No	No	No	No	0	No	No	No	No	No	No	No
503	Selected	2007-02-22	male	2019-09-26	1	12.5914	1	0	No	No	Full Health insurance (including a top-up policy)	No	Stable and healthy housing	Not needing a social assistance	No	No	No	No	No	No	1	No	No	No	Yes	No	No	0	No	No	No	No	No	No	No
504	Selected	2015-09-18	male	2019-09-26	1	4.0219	1	13	No	No	Complete health insurance for deprived citizens	No	Stable and healthy housing	Not needing a social assistance	No	No	Yes	No	No	No	0	No	No	No	No	No	No	0	No	No	No	No	No	No	No
505	Selected	2016-04-29	female	2019-09-26	1	3.40862	1	0	No	No	Full Health insurance (including a top-up policy)	No	Stable and healthy housing	Not needing a social assistance	No	No	No	No	No	No	0	No	No	No	No	No	No	0	No	No	No	No	No	No	No
506	Selected	2011-03-27	male	2019-09-26	1	8.50103	1	0	No	No	Full Health insurance (including a top-up policy)	No	Stable and healthy housing	Not needing a social assistance	No	No	No	No	No	No	0	No	No	No	No	No	No	0	No	No	No	No	No	No	No
507	Selected	2010-10-14	male	2019-09-26	1	8.95003	1	0	No	No	Full Health insurance (including a top-up policy)	No	Stable and healthy housing	Not needing a social assistance	No	No	No	No	No	No	0	No	No	No	No	No	No	0	No	No	No	No	No	No	No
508	Selected	2016-08-09	male	2019-09-27	1	3.12936	1	4	No	No	Complete health insurance for deprived citizens	No	Stable and healthy housing	Not needing a social assistance	No	No	No	No	No	No	0	No	No	No	No	No	No	0	No	No	No	No	No	No	No
509	Selected	2010-02-02	male	2019-09-27	1	9.64819	1	47	No	No	Incomplete health insurance	No	Unhealthy housing	Not needing a social assistance	Yes	Yes	No	No	No	No	2	No	Yes	No	No	Yes	No	0	No	No	No	No	No	No	No
510	Selected	2010-05-31	male	2019-09-27	1	9.32512	1	30	No	No	Incomplete health insurance	No	Stable and healthy housing	Not needing a social assistance	Yes	Yes	No	Yes	No	No	0	No	No	No	No	No	No	0	No	No	No	No	No	No	No
511	Selected	2014-09-19	female	2019-09-27	1	5.02122	1	0	No	No	Full Health insurance (including a top-up policy)	No	Stable and healthy housing	Not needing a social assistance	No	No	No	No	No	No	0	No	No	No	No	No	No	0	No	No	No	No	No	No	No
512	Selected	2016-04-11	female	2019-09-27	1	3.46064	1	0	No	No	Full Health insurance (including a top-up policy)	No	Stable and healthy housing	Not needing a social assistance	No	No	No	No	No	No	0	No	No	No	No	No	No	0	No	No	No	No	No	No	No
513	Selected	2005-11-05	female	2019-09-27	1	13.8919	1	68	Yes	No	No health insurance (even if enrollment in progress or insurance abroad)	Yes	Unstable housing (temporary social housing or housed by relatives, slums)	Needing social assistance without knowing how to get this	No	No	No	No	Yes	No	3	Yes	Yes	Yes	No	No	No	4	Yes	Yes	Yes	No	No	Yes	Yes
514	Selected	2011-09-17	female	2019-10-08	1	8.02738	1	32	No	No	Complete health insurance for deprived citizens	No	Unhealthy housing	Needing social assistance	Yes	No	No	No	No	No	2	No	Yes	No	No	Yes	No	0	No	No	No	No	No	No	No
515	Selected	2013-11-04	male	2019-10-08	1	5.92471	1	10	No	No	Complete health insurance for deprived citizens	No	Stable and healthy housing	Needing social assistance	No	No	No	No	No	No	0	No	No	No	No	No	No	0	No	No	No	No	No	No	No
516	Selected	2013-04-16	male	2019-10-08	1	6.47776	1	0	No	No	Full Health insurance (including a top-up policy)	No	Stable and healthy housing	Not needing a social assistance	No	No	No	No	No	No	0	No	No	No	No	No	No	0	No	No	No	No	No	No	No
517	Selected	2007-11-20	male	2019-10-08	1	11.8823	1	44	No	No	Complete health insurance for deprived citizens	No	Unhealthy housing	Needing social assistance	No	Yes	Yes	Yes	No	No	2	No	Yes	No	No	No	Yes	0	No	No	No	No	No	No	No
518	Selected	2013-08-23	male	2019-10-08	1	6.12457	1	5	No	No	Full Health insurance (including a top-up policy)	No	Stable and healthy housing	Not needing a social assistance	Yes	No	No	No	No	No	1	No	No	No	No	No	Yes	0	No	No	No	No	No	No	No
519	Selected	2008-03-20	male	2019-10-08	1	11.551	1	4	No	No	Complete health insurance for deprived citizens	No	Stable and healthy housing	Not needing a social assistance	No	No	No	No	No	No	0	No	No	No	No	No	No	0	No	No	No	No	No	No	No
520	Selected	2015-11-03	female	2019-10-09	1	3.92882	1	0	No	No	Full Health insurance (including a top-up policy)	No	Stable and healthy housing	Not needing a social assistance	No	No	No	No	No	No	0	No	No	No	No	No	No	0	No	No	No	No	No	No	No
521	Selected	2015-07-29	male	2019-10-09	1	4.19712	1	0	No	No	Full Health insurance (including a top-up policy)	No	Stable and healthy housing	Not needing a social assistance	No	No	No	No	No	No	0	No	No	No	No	No	No	0	No	No	No	No	No	No	No
522	Selected	2012-05-01	male	2019-10-09	1	7.43874	1	4	No	No	Complete health insurance for deprived citizens	No	Stable and healthy housing	Not needing a social assistance	No	No	No	No	No	No	0	No	No	No	No	No	No	0	No	No	No	No	No	No	No
523	Selected	2013-01-30	male	2019-10-09	1	6.68857	1	9	No	No	Complete health insurance for deprived citizens	No	Stable and healthy housing	Not needing a social assistance	Yes	No	No	No	No	No	1	No	No	No	No	Yes	No	0	No	No	No	No	No	No	No
524	Selected	2014-03-27	male	2019-10-09	1	5.53593	1	0	No	No	Full Health insurance (including a top-up policy)	No	Stable and healthy housing	Not needing a social assistance	No	No	No	No	No	No	0	No	No	No	No	No	No	0	No	No	No	No	No	No	No
525	Selected	2016-04-04	female	2019-10-09	1	3.51266	1	5	No	No	Full Health insurance (including a top-up policy)	No	Stable and healthy housing	Not needing a social assistance	Yes	No	No	No	No	No	0	No	No	No	No	No	No	0	No	No	No	No	No	No	No
526	Selected	2009-12-27	male	2019-10-10	1	9.78234	1	5	No	No	Full Health insurance (including a top-up policy)	No	Stable and healthy housing	Not needing a social assistance	Yes	No	No	No	No	No	0	No	No	No	No	No	No	0	No	No	No	No	No	No	No
527	Selected	2009-11-03	female	2019-10-10	1	9.93292	1	5	No	No	Full Health insurance (including a top-up policy)	No	Stable and healthy housing	Not needing a social assistance	Yes	No	No	No	No	No	1	No	No	No	No	Yes	No	0	No	No	No	No	No	No	No
528	Selected	2007-04-04	female	2019-10-10	1	12.5175	1	6	No	No	Full Health insurance (including a top-up policy)	No	Stable and healthy housing	Needing social assistance	No	No	No	No	No	No	0	No	No	No	No	No	No	0	No	No	No	No	No	No	No
529	Selected	2013-02-01	male	2019-10-10	1	6.68583	1	0	No	No	Full Health insurance (including a top-up policy)	No	Stable and healthy housing	Not needing a social assistance	No	No	No	No	No	No	0	No	No	No	No	No	No	0	No	No	No	No	No	No	No
530	Selected	2008-12-18	male	2019-10-10	1	10.809	1	5	No	No	Full Health insurance (including a top-up policy)	No	Stable and healthy housing	Not needing a social assistance	Yes	No	No	No	No	No	0	No	No	No	No	No	No	0	No	No	No	No	No	No	No
531	Selected	2006-08-31	male	2019-10-10	1	13.1088	1	6	No	No	Full Health insurance (including a top-up policy)	No	Stable and healthy housing	Needing social assistance	No	No	No	No	No	No	0	No	No	No	No	No	No	0	No	No	No	No	No	No	No
532	Selected	2011-06-04	female	2019-10-11	1	8.35045	1	0	No	No	Full Health insurance (including a top-up policy)	No	Stable and healthy housing	Not needing a social assistance	No	No	No	No	No	No	0	No	No	No	No	No	No	0	No	No	No	No	No	No	No
533	Selected	2008-11-27	male	2019-10-14	1	10.8693	1	26	No	No	Complete health insurance for deprived citizens	No	Unhealthy housing	Not needing a social assistance	Yes	No	No	Yes	No	No	1	No	No	No	No	Yes	No	0	No	No	No	No	No	No	No
534	Selected	2010-01-28	male	2019-10-14	1	9.70842	1	0	No	No	Full Health insurance (including a top-up policy)	No	Stable and healthy housing	Not needing a social assistance	No	No	No	No	No	No	1	No	No	No	Yes	No	No	0	No	No	No	No	No	No	No
535	Selected	2015-10-17	male	2019-10-11	1	3.99179	1	0	No	No	Full Health insurance (including a top-up policy)	No	Stable and healthy housing	Not needing a social assistance	No	No	No	No	No	No	0	No	No	No	No	No	No	0	No	No	No	No	No	No	No
536	Selected	2013-08-21	male	2019-10-11	1	6.13826	1	22	No	No	Incomplete health insurance	No	Stable and healthy housing	Not needing a social assistance	Yes	No	No	No	No	No	0	No	No	No	No	No	No	0	No	No	No	No	No	No	No
537	Selected	2010-12-15	female	2019-10-11	1	8.82136	1	0	No	No	Full Health insurance (including a top-up policy)	No	Stable and healthy housing	Not needing a social assistance	No	No	No	No	No	No	1	No	No	No	No	No	Yes	0	No	No	No	No	No	No	No
538	Selected	2014-04-21	male	2019-10-14	1	5.47296	1	31	No	No	Complete health insurance for deprived citizens	No	Unstable housing (temporary social housing or housed by relatives, slums)	Needing social assistance	Yes	No	No	No	No	No	0	No	No	No	No	No	No	0	No	No	No	No	No	No	No
539	Selected	2007-07-14	male	2019-10-14	1	12.2519	1	0	No	No	Full Health insurance (including a top-up policy)	No	Stable and healthy housing	Not needing a social assistance	No	No	No	No	No	No	0	No	No	No	No	No	No	0	No	No	No	No	No	No	No
540	Selected	2009-08-01	female	2019-10-14	1	10.2012	1	4	No	No	Complete health insurance for deprived citizens	No	Stable and healthy housing	Not needing a social assistance	No	No	No	No	No	No	0	No	No	No	No	No	No	0	No	No	No	No	No	No	No
541	Selected	2003-12-23	male	2019-10-14	1	15.8084	1	25	Yes	No	Incomplete health insurance	No	Stable and healthy housing	Not needing a social assistance	No	No	No	No	No	No	1	Yes	No	No	No	No	No	0	No	No	No	No	No	No	No
542	Selected	2012-02-13	male	2019-10-14	1	7.66598	1	9	No	No	Full Health insurance (including a top-up policy)	No	Stable and healthy housing	Not needing a social assistance	No	No	Yes	No	No	No	1	No	No	No	No	No	Yes	0	No	No	No	No	No	No	No
543	Selected	2013-07-01	female	2019-10-14	1	6.28611	1	4	No	No	Complete health insurance for deprived citizens	No	Stable and healthy housing	Not needing a social assistance	No	No	No	No	No	No	0	No	No	No	No	No	No	0	No	No	No	No	No	No	No
544	Selected	2013-07-03	male	2019-10-15	1	6.28063	1	2	No	No	Full Health insurance (including a top-up policy)	No	Stable and healthy housing	Not needing a social assistance	No	No	No	No	Yes	No	0	No	No	No	No	No	No	0	No	No	No	No	No	No	No
545	Selected	2016-09-06	male	2019-10-15	1	3.10472	1	0	No	No	Full Health insurance (including a top-up policy)	No	Stable and healthy housing	Not needing a social assistance	No	No	No	No	No	No	0	No	No	No	No	No	No	0	No	No	No	No	No	No	No
546	Selected	2013-05-02	female	2019-10-15	1	6.45311	1	0	No	No	Full Health insurance (including a top-up policy)	No	Stable and healthy housing	Not needing a social assistance	No	No	No	No	No	No	0	No	No	No	No	No	No	0	No	No	No	No	No	No	No
547	Selected	2011-12-15	male	2019-10-15	1	7.83299	1	0	No	No	Full Health insurance (including a top-up policy)	No	Stable and healthy housing	Not needing a social assistance	No	No	No	No	No	No	0	No	No	No	No	No	No	0	No	No	No	No	No	No	No
548	Selected	2006-06-24	female	2019-10-15	1	13.3087	1	13	No	No	Full Health insurance (including a top-up policy)	No	Stable and healthy housing	Not needing a social assistance	Yes	Yes	No	No	No	No	0	No	No	No	No	No	No	0	No	No	No	No	No	No	No
549	Selected	2004-01-06	male	2019-10-16	1	15.7728	1	26	No	No	Complete health insurance for deprived citizens	No	Unhealthy housing	Not needing a social assistance	Yes	No	No	No	No	No	1	No	Yes	No	No	No	No	0	No	No	No	No	No	No	No
550	Selected	2014-09-01	female	2019-10-17	1	5.12252	1	4	No	No	Complete health insurance for deprived citizens	No	Stable and healthy housing	Not needing a social assistance	No	No	No	No	No	No	0	No	No	No	No	No	No	0	No	No	No	No	No	No	No
551	Selected	2013-07-24	male	2019-10-17	1	6.23135	1	0	No	No	Full Health insurance (including a top-up policy)	No	Stable and healthy housing	Not needing a social assistance	No	No	No	No	No	No	0	No	No	No	No	No	No	0	No	No	No	No	No	No	No
552	Selected	2014-08-13	male	2019-10-03	1	5.17728	1	54	No	No	No health insurance (even if enrollment in progress or insurance abroad)	No	Unhealthy housing	Needing social assistance	Yes	No	No	No	No	No	4	Yes	Yes	No	Yes	No	Yes	5	Yes	Yes	Yes	Yes	No	Yes	Yes
553	Selected	2016-08-13	female	2019-10-17	1	3.13758	1	10	No	No	Complete health insurance for deprived citizens	No	Stable and healthy housing	Needing social assistance	No	No	No	No	No	No	1	No	No	No	Yes	No	No	0	No	No	No	No	No	No	No
554	Selected	2004-04-14	male	2019-10-17	1	15.5072	1	5	No	No	Full Health insurance (including a top-up policy)	No	Stable and healthy housing	Not needing a social assistance	Yes	No	No	No	No	No	0	No	No	No	No	No	No	0	No	No	No	No	No	No	No
555	Selected	2012-12-30	male	2019-10-17	1	6.79535	1	0	No	No	Full Health insurance (including a top-up policy)	No	Stable and healthy housing	Not needing a social assistance	No	No	No	No	No	No	1	No	No	No	Yes	No	No	0	No	No	No	No	No	No	No
556	Selected	2006-02-20	female	2019-10-17	1	13.6537	1	9	No	No	Complete health insurance for deprived citizens	No	Stable and healthy housing	Not needing a social assistance	Yes	No	No	No	No	No	0	No	No	No	No	No	No	0	No	No	No	No	No	No	No
557	Selected	2006-09-15	female	2019-10-18	1	13.0869	1	13	No	No	Full Health insurance (including a top-up policy)	No	Stable and healthy housing	Not needing a social assistance	Yes	Yes	No	Yes	No	No	2	No	No	No	Yes	Yes	No	0	No	No	No	No	No	No	No
558	Selected	2012-01-03	male	2019-10-18	1	7.78918	1	0	No	No	Full Health insurance (including a top-up policy)	No	Stable and healthy housing	Not needing a social assistance	No	No	No	No	No	No	0	No	No	No	No	No	No	0	No	No	No	No	No	No	No
559	Selected	2016-01-04	male	2019-10-18	1	3.78645	1	9	No	No	Complete health insurance for deprived citizens	No	Stable and healthy housing	Not needing a social assistance	Yes	No	No	No	No	No	0	No	No	No	No	No	No	0	No	No	No	No	No	No	No
560	Selected	2013-06-26	female	2019-10-18	1	6.31075	1	0	No	No	Full Health insurance (including a top-up policy)	No	Stable and healthy housing	Not needing a social assistance	No	No	No	No	No	No	0	No	No	No	No	No	No	0	No	No	No	No	No	No	No
561	Selected	2015-07-13	male	2019-10-18	1	4.26557	1	9	No	No	Complete health insurance for deprived citizens	No	Stable and healthy housing	Not needing a social assistance	Yes	No	No	No	No	No	2	Yes	No	No	Yes	No	No	1	No	Yes	No	No	No	No	No
562	Selected	2011-10-21	male	2019-10-18	1	7.99179	1	9	No	No	Full Health insurance (including a top-up policy)	No	Stable and healthy housing	Not needing a social assistance	No	No	Yes	No	No	No	1	No	No	No	No	No	Yes	0	No	No	No	No	No	No	No
563	Selected	2015-05-20	male	2019-10-21	1	4.41341	1	0	No	No	Full Health insurance (including a top-up policy)	No	Stable and healthy housing	Not needing a social assistance	No	No	No	No	No	No	1	No	Yes	No	No	No	No	0	No	No	No	No	No	No	No
564	Selected	2009-05-20	male	2019-10-23	1	10.4203	1	0	No	No	Full Health insurance (including a top-up policy)	No	Stable and healthy housing	Not needing a social assistance	No	No	No	No	No	No	0	No	No	No	No	No	No	0	No	No	No	No	No	No	No
565	Selected	2009-10-28	female	2019-10-23	1	9.98494	1	5	No	No	Full Health insurance (including a top-up policy)	No	Stable and healthy housing	Not needing a social assistance	Yes	No	No	No	No	No	0	No	No	No	No	No	No	0	No	No	No	No	No	No	No
566	Selected	2011-01-05	female	2019-10-25	1	8.79672	1	0	No	No	Full Health insurance (including a top-up policy)	No	Stable and healthy housing	Not needing a social assistance	No	No	No	No	No	No	0	No	No	No	No	No	No	0	No	No	No	No	No	No	No
567	Selected	2008-04-29	female	2019-10-25	1	11.488	1	0	No	No	Full Health insurance (including a top-up policy)	No	Stable and healthy housing	Not needing a social assistance	No	No	No	Yes	No	No	1	No	Yes	No	No	No	No	0	No	No	No	No	No	No	No
568	Selected	2010-01-17	female	2019-10-25	1	9.76865	1	4	No	No	Complete health insurance for deprived citizens	No	Stable and healthy housing	Not needing a social assistance	No	No	No	No	No	No	0	No	No	No	No	No	No	0	No	No	No	No	No	No	No
569	Selected	2014-11-10	female	2019-10-24	1	4.95551	1	9	No	No	Full Health insurance (including a top-up policy)	No	Stable and healthy housing	Not needing a social assistance	No	No	Yes	No	No	No	1	No	No	No	No	No	Yes	0	No	No	No	No	No	No	No
570	Selected	2006-10-24	female	2019-10-25	1	13.0021	1	0	No	No	Full Health insurance (including a top-up policy)	No	Stable and healthy housing	Not needing a social assistance	No	No	No	No	No	No	1	No	No	No	No	No	Yes	0	No	No	No	No	No	No	No
571	Selected	2013-02-14	male	2019-10-25	1	6.69131	1	18	No	No	Complete health insurance for deprived citizens	No	Stable and healthy housing	Needing social assistance	No	Yes	No	No	No	No	1	No	No	No	Yes	No	No	0	No	No	No	No	No	No	No
572	Selected	2013-07-25	female	2019-10-28	1	6.25873	1	17	No	No	Incomplete health insurance	No	Stable and healthy housing	Not needing a social assistance	No	No	No	No	No	No	2	Yes	No	No	Yes	No	No	1	No	Yes	No	No	No	No	No
573	Selected	2016-06-05	male	2019-10-28	1	3.39493	1	17	No	No	Complete health insurance for deprived citizens	Yes	Stable and healthy housing	Needing social assistance	No	No	No	No	No	No	0	No	No	No	No	No	No	0	No	No	No	No	No	No	No
574	Selected	2013-09-19	female	2019-10-28	1	6.10541	1	0	No	No	Full Health insurance (including a top-up policy)	No	Stable and healthy housing	Not needing a social assistance	No	No	No	No	No	No	0	No	No	No	No	No	No	0	No	No	No	No	No	No	No
575	Selected	2016-02-23	male	2019-10-28	1	3.67693	1	22	No	No	Incomplete health insurance	No	Stable and healthy housing	Not needing a social assistance	Yes	No	No	No	No	No	2	No	No	No	Yes	Yes	No	0	No	No	No	No	No	No	No
576	Selected	2011-10-27	male	2019-10-28	1	8.00274	1	14	No	No	Full Health insurance (including a top-up policy)	No	Stable and healthy housing	Needing social assistance without knowing how to get this	Yes	No	No	Yes	No	No	1	No	No	No	Yes	No	No	0	No	No	No	No	No	No	No
577	Selected	2007-03-12	male	2019-10-29	1	12.6324	1	0	No	No	Full Health insurance (including a top-up policy)	No	Stable and healthy housing	Not needing a social assistance	No	No	No	No	No	No	1	No	No	No	Yes	No	No	0	No	No	No	No	No	No	No
578	Selected	2009-02-12	male	2019-10-29	1	10.7077	1	0	No	No	Full Health insurance (including a top-up policy)	No	Stable and healthy housing	Not needing a social assistance	No	No	No	No	No	No	0	No	No	No	No	No	No	0	No	No	No	No	No	No	No
579	Selected	2011-07-13	female	2019-10-29	1	8.29569	1	0	No	No	Full Health insurance (including a top-up policy)	No	Stable and healthy housing	Not needing a social assistance	No	No	No	No	No	No	0	No	No	No	No	No	No	0	No	No	No	No	No	No	No
580	Selected	2004-09-13	female	2019-10-29	1	15.1239	1	15	No	No	Complete health insurance for deprived citizens	No	Stable and healthy housing	Needing social assistance	Yes	No	No	No	No	No	0	No	No	No	No	No	No	0	No	No	No	No	No	No	No
581	Selected	2012-11-06	male	2019-11-04	1	6.99247	1	17	No	No	Full Health insurance (including a top-up policy)	No	Stable and healthy housing	Needing social assistance without knowing how to get this	No	Yes	No	No	No	No	2	No	Yes	No	Yes	No	No	1	No	Yes	No	No	No	No	No
582	Selected	2007-11-02	female	2019-11-04	1	12.0055	1	30	No	No	Complete health insurance for deprived citizens	No	Unhealthy housing	Not needing a social assistance	No	No	Yes	No	No	No	2	No	Yes	No	No	No	Yes	0	No	No	No	No	No	No	No
583	Selected	2016-11-02	male	2019-11-04	1	3.00342	1	0	No	No	Full Health insurance (including a top-up policy)	No	Stable and healthy housing	Not needing a social assistance	No	No	No	No	No	No	0	No	No	No	No	No	No	0	No	No	No	No	No	No	No
584	Selected	2005-07-21	female	2019-11-04	1	14.2888	1	26	No	No	Incomplete health insurance	No	Stable and healthy housing	Needing social assistance without knowing how to get this	No	No	No	No	No	No	1	Yes	No	No	No	No	No	1	No	Yes	No	No	No	No	No
585	Selected	2006-05-24	female	2019-11-04	1	13.4483	1	0	No	No	Full Health insurance (including a top-up policy)	No	Stable and healthy housing	Not needing a social assistance	No	No	No	No	No	No	0	No	No	No	No	No	No	0	No	No	No	No	No	No	No
586	Selected	2005-11-17	female	2019-11-05	1	13.9658	1	0	No	No	Full Health insurance (including a top-up policy)	No	Stable and healthy housing	Not needing a social assistance	No	No	No	No	No	No	0	No	No	No	No	No	No	0	No	No	No	No	No	No	No
587	Selected	2007-06-19	male	2019-11-05	1	12.3806	1	19	No	No	Complete health insurance for deprived citizens	No	Stable and healthy housing	Needing social assistance	No	No	Yes	No	No	No	0	No	No	No	No	No	No	0	No	No	No	No	No	No	No
588	Selected	2014-03-27	female	2019-11-05	1	5.60986	1	75	No	No	No health insurance (even if enrollment in progress or insurance abroad)	Yes	Unstable housing (temporary social housing or housed by relatives, slums)	Needing social assistance without knowing how to get this	Yes	Yes	No	No	Yes	Yes	5	Yes	No	Yes	Yes	Yes	Yes	3	Yes	Yes	Yes	No	No	No	Yes
589	Selected	2006-03-07	female	2019-11-05	1	13.6646	1	17	No	No	Complete health insurance for deprived citizens	No	Stable and healthy housing	Not needing a social assistance	Yes	Yes	No	No	No	No	2	No	No	No	Yes	Yes	No	0	No	No	No	No	No	No	No
590	Selected	2013-03-05	male	2019-11-06	1	6.67214	1	5	No	No	Full Health insurance (including a top-up policy)	No	Stable and healthy housing	Not needing a social assistance	Yes	No	No	No	No	No	0	No	No	No	No	No	No	0	No	No	No	No	No	No	No
591	Selected	2016-09-06	male	2019-11-06	1	3.16496	1	10	No	No	Complete health insurance for deprived citizens	No	Stable and healthy housing	Needing social assistance	No	No	No	No	No	No	0	No	No	No	No	No	No	0	No	No	No	No	No	No	No
592	Selected	2016-09-03	male	2019-11-06	1	3.17317	1	57	No	No	No health insurance (even if enrollment in progress or insurance abroad)	No	Unhealthy housing	Needing social assistance	No	Yes	No	No	No	No	1	No	No	No	No	No	Yes	0	No	No	No	No	No	No	No
593	Selected	2008-08-18	male	2019-11-06	1	11.217	1	0	No	No	Full Health insurance (including a top-up policy)	No	Stable and healthy housing	Not needing a social assistance	No	No	No	No	No	No	0	No	No	No	No	No	No	0	No	No	No	No	No	No	No
594	Selected	2008-08-15	female	2019-11-06	1	11.2252	1	4	No	No	Complete health insurance for deprived citizens	No	Stable and healthy housing	Not needing a social assistance	No	No	No	No	No	No	0	No	No	No	No	No	No	0	No	No	No	No	No	No	No
595	Selected	2011-03-31	male	2019-11-07	1	8.60506	1	49	No	No	Incomplete health insurance	No	Unhealthy housing	Needing social assistance	No	No	Yes	No	No	No	0	No	No	No	No	No	No	2	No	Yes	No	Yes	No	No	Yes
596	Selected	2005-11-05	female	2019-11-06	1	14.0014	1	33	No	No	Full Health insurance (including a top-up policy)	No	Unhealthy housing	Not needing a social assistance	Yes	No	Yes	No	Yes	No	2	No	No	No	Yes	No	Yes	0	No	No	No	No	No	No	No
597	Selected	2016-09-24	male	2019-11-07	1	3.11841	1	16	No	No	Full Health insurance (including a top-up policy)	No	Stable and healthy housing	Not needing a social assistance	Yes	No	Yes	No	No	Yes	1	No	No	No	No	Yes	No	0	No	No	No	No	No	No	No
598	Selected	2016-10-15	female	2019-11-07	1	3.06092	1	0	No	No	Full Health insurance (including a top-up policy)	No	Stable and healthy housing	Not needing a social assistance	No	No	No	No	No	No	0	No	No	No	No	No	No	0	No	No	No	No	No	No	No
599	Selected	2008-08-16	male	2019-11-07	1	11.2252	1	4	No	No	Complete health insurance for deprived citizens	No	Stable and healthy housing	Not needing a social assistance	No	No	No	No	No	No	0	No	No	No	No	No	No	0	No	No	No	No	No	No	No
600	Selected	2009-08-02	female	2018-04-09	2	8.7	1	0	No	No	Full Health insurance (including a top-up policy)	No	Stable and healthy housing	Not needing a social assistance	No	No	No	No	No	No	0	No	No	No	No	No	No	0	No	No	No	No	No	No	No
601	Selected	2008-09-29	male	2018-04-09	2	9.5	1	0	No	No	Full Health insurance (including a top-up policy)	No	Stable and healthy housing	Not needing a social assistance	No	No	No	No	No	No	0	No	No	No	No	No	No	0	No	No	No	No	No	No	No	2018-10-09	6.01232	No	No	Full Health insurance (including a top-up policy)	No	Stable and healthy housing	Not needing a social assistance	No	No	No	No	No	No
602	Selected	2013-11-06	male	2018-04-09	2	4.4	1	9	No	No	Complete health insurance for deprived citizens	No	Stable and healthy housing	Not needing a social assistance	Yes	No	No	No	No	No	0	No	No	No	No	No	No	0	No	No	No	No	No	No	No
603	Selected	2007-08-07	male	2018-04-09	2	10.7	1	0	No	No	Full Health insurance (including a top-up policy)	No	Stable and healthy housing	Not needing a social assistance	No	No	No	No	No	No	0	No	No	No	No	No	No	0	No	No	No	No	No	No	No
604	Selected	2004-08-13	male	2018-04-10	2	13.7	1	5	No	No	Full Health insurance (including a top-up policy)	No	Stable and healthy housing	Not needing a social assistance	Yes	No	No	No	No	No	0	No	No	No	No	No	No	0	No	No	No	No	No	No	No
605	Selected	2012-08-08	male	2018-04-10	2	5.7	1	0	No	No	Full Health insurance (including a top-up policy)	No	Stable and healthy housing	Not needing a social assistance	No	No	No	No	No	No	0	No	No	No	No	No	No	0	No	No	No	No	No	No	No
606	Selected	2014-06-06	female	2018-04-10	2	3.8	1	35	No	No	Complete health insurance for deprived citizens	No	Unhealthy housing	Needing social assistance	No	Yes	No	Yes	No	No	3	No	Yes	No	Yes	No	Yes	2	No	No	No	Yes	No	Yes	Yes
607	Selected	2011-05-05	female	2018-04-10	2	6.9	1	9	No	No	Full Health insurance (including a top-up policy)	No	Stable and healthy housing	Not needing a social assistance	No	No	Yes	No	No	No	0	No	No	No	No	No	No	0	No	No	No	No	No	No	No
608	Selected	2004-05-14	male	2018-04-17	2	13.9	1	0	No	No	Full Health insurance (including a top-up policy)	No	Stable and healthy housing	Not needing a social assistance	No	No	No	No	No	No	0	No	No	No	No	No	No	0	No	No	No	No	No	No	No
609	Selected	2015-03-29	female	2018-04-17	2	3.1	1	54	No	No	No health insurance (even if enrollment in progress or insurance abroad)	No	Stable and healthy housing	Needing social assistance	Yes	Yes	Yes	No	No	No	4	Yes	No	No	Yes	Yes	Yes	4	Yes	Yes	Yes	No	No	Yes	Yes
610	Selected	2006-07-08	male	2018-04-17	2	11.8	1	0	No	No	Full Health insurance (including a top-up policy)	No	Stable and healthy housing	Not needing a social assistance	No	No	No	No	No	No	0	No	No	No	No	No	No	0	No	No	No	No	No	No	No
611	Selected	2014-11-30	male	2018-04-19	2	3.4	1	10	No	No	Complete health insurance for deprived citizens	No	Stable and healthy housing	Needing social assistance	No	No	No	No	No	No	0	No	No	No	No	No	No	0	No	No	No	No	No	No	No
612	Selected	2008-11-25	male	2018-04-19	2	9.4	1	27	No	No	Complete health insurance for deprived citizens	No	Unhealthy housing	Needing social assistance	No	No	No	No	No	No	1	No	No	No	Yes	No	No	1	No	No	No	Yes	No	No	No
613	Selected	2014-03-20	male	2018-04-19	2	4.1	1	9	No	No	Complete health insurance for deprived citizens	No	Stable and healthy housing	Not needing a social assistance	Yes	No	No	No	No	No	0	No	No	No	No	No	No	0	No	No	No	No	No	No	No
614	Selected	2002-08-08	female	2018-04-19	2	15.7	1	11	No	No	Full Health insurance (including a top-up policy)	No	Stable and healthy housing	Needing social assistance	Yes	No	No	No	No	No	0	No	No	No	No	No	No	0	No	No	No	No	No	No	No
615	Selected	2013-08-26	female	2018-04-19	2	4.6	1	25	No	No	Incomplete health insurance	No	Stable and healthy housing	Needing social assistance	No	No	No	No	Yes	No	0	No	No	No	No	No	No	0	No	No	No	No	No	No	No
616	Selected	2002-09-16	male	2018-04-19	2	15.6	1	5	No	No	Full Health insurance (including a top-up policy)	No	Stable and healthy housing	Not needing a social assistance	Yes	No	No	No	No	No	0	No	No	No	No	No	No	0	No	No	No	No	No	No	No
617	Selected	2013-07-12	male	2018-04-20	2	4.8	1	0	No	No	Full Health insurance (including a top-up policy)	No	Stable and healthy housing	Not needing a social assistance	No	No	No	No	No	No	0	No	No	No	No	No	No	0	No	No	No	No	No	No	No
618	Selected	2011-02-22	male	2018-04-20	2	7.2	1	0	No	No	Full Health insurance (including a top-up policy)	No	Stable and healthy housing	Not needing a social assistance	No	No	No	Yes	No	No	0	No	No	No	No	No	No	0	No	No	No	No	No	No	No
619	Selected	2013-03-11	female	2018-04-20	2	5.1	1	10	No	No	Complete health insurance for deprived citizens	No	Stable and healthy housing	Needing social assistance	No	No	No	No	No	No	0	No	No	No	No	No	No	0	No	No	No	No	No	No	No
620	Selected	2007-07-05	male	2018-04-20	2	10.8	1	0	No	No	Full Health insurance (including a top-up policy)	No	Stable and healthy housing	Not needing a social assistance	No	No	No	No	No	No	0	No	No	No	No	No	No	0	No	No	No	No	No	No	No
621	Selected	2003-12-02	female	2018-04-20	2	14.6	1	15	No	No	Complete health insurance for deprived citizens	No	Stable and healthy housing	Needing social assistance	Yes	No	No	No	No	No	1	No	No	No	No	Yes	No	0	No	No	No	No	No	No	No
622	Selected	2013-11-06	female	2018-04-23	2	4.5	1	49	Yes	No	Complete health insurance for deprived citizens	No	Unstable housing (temporary social housing or housed by relatives, slums)	Needing social assistance	Yes	Yes	No	Yes	Yes	No	2	Yes	No	No	No	Yes	No	4	Yes	Yes	Yes	Yes	No	No	Yes
623	Selected	2010-11-09	male	2018-04-23	2	7.5	1	0	No	No	Full Health insurance (including a top-up policy)	No	Stable and healthy housing	Not needing a social assistance	No	No	No	No	No	No	2	Yes	No	No	No	Yes	No	0	No	No	No	No	No	No	No
624	Selected	2008-12-04	male	2018-04-23	2	9.4	1	0	No	No	Full Health insurance (including a top-up policy)	No	Stable and healthy housing	Not needing a social assistance	No	No	No	No	No	No	0	No	No	No	No	No	No	0	No	No	No	No	No	No	No
625	Selected	2010-03-16	female	2018-04-23	2	8.1	1	0	No	No	Full Health insurance (including a top-up policy)	No	Stable and healthy housing	Not needing a social assistance	No	No	No	No	No	No	0	No	No	No	No	No	No	0	No	No	No	No	No	No	No
626	Selected	2009-06-10	male	2018-04-23	2	8.9	1	6	No	No	Full Health insurance (including a top-up policy)	No	Stable and healthy housing	Needing social assistance	No	No	No	No	No	No	0	No	No	No	No	No	No	0	No	No	No	No	No	No	No
627	Selected	2008-08-16	male	2018-04-23	2	9.7	1	0	No	No	Full Health insurance (including a top-up policy)	No	Stable and healthy housing	Not needing a social assistance	No	No	No	No	No	No	0	No	No	No	No	No	No	0	No	No	No	No	No	No	No
628	Selected	2012-02-15	female	2018-04-24	2	6.2	1	0	No	No	Full Health insurance (including a top-up policy)	No	Stable and healthy housing	Not needing a social assistance	No	No	No	No	No	No	0	No	No	No	No	No	No	0	No	No	No	No	No	No	No
629	Selected	2014-05-21	male	2018-04-24	2	3.9	1	40	No	No	Complete health insurance for undocumented migrants	No	Unhealthy housing	Needing social assistance	No	Yes	No	Yes	No	No	4	Yes	Yes	No	Yes	No	Yes	2	No	Yes	No	No	No	Yes	Yes
630	Selected	2014-06-20	male	2018-04-30	2	3.8	1	15	No	No	Complete health insurance for deprived citizens	No	Stable and healthy housing	Needing social assistance	Yes	No	No	No	No	No	1	No	No	No	Yes	No	No	0	No	No	No	No	No	No	No
631	Selected	2007-03-18	male	2018-04-30	2	11.1	1	70	No	Yes	Complete health insurance for undocumented migrants	No	Unhealthy housing	Needing social assistance	Yes	Yes	Yes	Yes	Yes	No	4	Yes	Yes	No	Yes	No	Yes	2	No	Yes	No	No	No	Yes	Yes
632	Selected	2014-08-14	female	2018-04-30	2	3.7	1	27	No	No	Incomplete health insurance	No	Stable and healthy housing	Needing social assistance	No	No	No	No	Yes	Yes	2	Yes	No	No	No	No	Yes	1	No	No	No	No	Yes	No	No
633	Selected	2008-03-24	male	2018-04-30	2	10.1	1	0	No	No	Full Health insurance (including a top-up policy)	No	Stable and healthy housing	Not needing a social assistance	No	No	No	No	No	No	2	Yes	No	No	No	No	Yes	0	No	No	No	No	No	No	No
634	Selected	2009-08-30	male	2018-05-03	2	8.7	1	12	No	No	Complete health insurance for deprived citizens	No	Stable and healthy housing	Needing social assistance	No	No	No	Yes	Yes	No	0	No	No	No	No	No	No	0	No	No	No	No	No	No	No
635	Selected	2010-09-04	male	2018-05-03	2	7.7	1	27	No	No	Complete health insurance for deprived citizens	No	Stable and healthy housing	Needing social assistance	No	Yes	Yes	Yes	No	No	3	No	No	No	Yes	Yes	Yes	2	No	No	No	No	Yes	Yes	Yes
636	Selected	2004-06-15	male	2018-05-03	2	13.9	1	0	No	No	Full Health insurance (including a top-up policy)	No	Stable and healthy housing	Not needing a social assistance	No	No	No	No	No	No	0	No	No	No	No	No	No	0	No	No	No	No	No	No	No
637	Selected	2005-08-10	male	2018-05-03	2	12.7	1	17	Yes	No	Full Health insurance (including a top-up policy)	No	Stable and healthy housing	Not needing a social assistance	No	No	Yes	No	No	No	0	No	No	No	No	No	No	0	No	No	No	No	No	No	No
638	Selected	2004-04-11	female	2018-05-07	2	14.1	1	35	No	No	Complete health insurance for deprived citizens	No	Unhealthy housing	Needing social assistance	No	Yes	No	No	No	No	2	No	Yes	No	Yes	No	No	1	No	No	No	Yes	No	No	No
639	Selected	2013-03-16	male	2018-05-07	2	5.1	1	0	No	No	Full Health insurance (including a top-up policy)	No	Stable and healthy housing	Not needing a social assistance	No	No	No	No	No	No	0	No	No	No	No	No	No	0	No	No	No	No	No	No	No
640	Selected	2013-01-02	female	2018-05-07	2	5.3	1	0	No	No	Full Health insurance (including a top-up policy)	No	Stable and healthy housing	Not needing a social assistance	No	No	No	No	No	No	0	No	No	No	No	No	No	0	No	No	No	No	No	No	No
641	Selected	2009-12-21	male	2018-05-07	2	8.4	1	23	No	No	Incomplete health insurance	No	Stable and healthy housing	Needing social assistance	No	No	No	No	No	No	0	No	No	No	No	No	No	0	No	No	No	No	No	No	No
642	Selected	2009-06-18	male	2018-05-07	2	8.9	1	23	No	No	Incomplete health insurance	No	Stable and healthy housing	Needing social assistance	No	No	No	No	No	No	0	No	No	No	No	No	No	0	No	No	No	No	No	No	No
643	Selected	2007-12-13	male	2018-05-11	2	10.4	1	0	No	No	Full Health insurance (including a top-up policy)	No	Stable and healthy housing	Not needing a social assistance	No	No	No	No	No	No	0	No	No	No	No	No	No	0	No	No	No	No	No	No	No
644	Selected	2012-06-02	female	2018-05-11	2	5.9	1	27	No	No	Complete health insurance for deprived citizens	No	Unhealthy housing	Needing social assistance	No	No	No	No	No	No	2	No	Yes	No	Yes	No	No	2	No	No	No	Yes	No	Yes	Yes
645	Selected	2006-12-14	male	2018-05-15	2	11.4	1	0	No	No	Full Health insurance (including a top-up policy)	No	Stable and healthy housing	Not needing a social assistance	No	No	No	No	No	No	0	No	No	No	No	No	No	0	No	No	No	No	No	No	No
646	Selected	2006-01-14	male	2018-05-15	2	12.3	1	5	No	No	Full Health insurance (including a top-up policy)	No	Stable and healthy housing	Not needing a social assistance	Yes	No	No	No	No	No	0	No	No	No	No	No	No	0	No	No	No	No	No	No	No
647	Selected	2014-06-13	male	2018-05-15	2	3.9	1	23	No	No	Incomplete health insurance	No	Stable and healthy housing	Needing social assistance	No	No	No	No	No	No	0	No	No	No	No	No	No	0	No	No	No	No	No	No	No
648	Selected	2007-11-05	male	2018-05-15	2	10.5	1	0	No	No	Full Health insurance (including a top-up policy)	No	Stable and healthy housing	Not needing a social assistance	No	No	No	No	No	No	0	No	No	No	No	No	No	0	No	No	No	No	No	No	No
649	Selected	2014-08-28	male	2018-05-15	2	3.7	1	35	No	No	Complete health insurance for deprived citizens	No	Unhealthy housing	Needing social assistance	No	Yes	No	Yes	No	No	3	Yes	Yes	No	Yes	No	No	1	No	No	No	Yes	No	No	No
650	Selected	2007-02-16	female	2018-05-16	2	11.2	1	41	No	No	Complete health insurance for deprived citizens	No	Unhealthy housing	Needing social assistance	Yes	No	Yes	No	No	No	0	No	No	No	No	No	No	3	No	Yes	No	Yes	No	Yes	Yes
651	Selected	2013-09-18	female	2018-05-16	2	4.7	1	13	No	No	Complete health insurance for deprived citizens	No	Stable and healthy housing	Not needing a social assistance	No	No	Yes	Yes	No	No	0	No	No	No	No	No	No	0	No	No	No	No	No	No	No
652	Selected	2002-06-01	male	2018-05-22	2	16	1	19	No	No	Full Health insurance (including a top-up policy)	No	Stable and healthy housing	Needing social assistance	Yes	Yes	No	Yes	No	No	2	No	No	No	Yes	Yes	No	0	No	No	No	No	No	No	No
653	Selected	2010-04-24	female	2018-05-22	2	8.1	1	0	No	No	Full Health insurance (including a top-up policy)	No	Stable and healthy housing	Not needing a social assistance	No	No	No	No	No	No	0	No	No	No	No	No	No	0	No	No	No	No	No	No	No
654	Selected	2007-05-30	female	2018-05-22	2	11	1	0	No	No	Full Health insurance (including a top-up policy)	No	Stable and healthy housing	Not needing a social assistance	No	No	No	No	No	No	0	No	No	No	No	No	No	0	No	No	No	No	No	No	No
655	Selected	2011-05-08	male	2018-05-22	2	7	1	0	No	No	Full Health insurance (including a top-up policy)	No	Stable and healthy housing	Not needing a social assistance	No	No	No	No	No	No	0	No	No	No	No	No	No	0	No	No	No	No	No	No	No
656	Selected	2009-08-30	male	2018-05-22	2	8.7	1	11	No	No	Full Health insurance (including a top-up policy)	No	Stable and healthy housing	Needing social assistance	Yes	No	No	Yes	No	No	0	No	No	No	No	No	No	0	No	No	No	No	No	No	No
657	Selected	2008-04-30	female	2018-05-23	2	10.1	1	0	No	No	Full Health insurance (including a top-up policy)	No	Stable and healthy housing	Not needing a social assistance	No	No	No	No	No	No	0	No	No	No	No	No	No	0	No	No	No	No	No	No	No
658	Selected	2012-11-17	female	2018-05-28	2	5.5	1	15	No	No	Complete health insurance for deprived citizens	No	Stable and healthy housing	Needing social assistance	Yes	No	No	No	No	No	0	No	No	No	No	No	No	0	No	No	No	No	No	No	No
659	Selected	2011-05-24	male	2018-05-28	2	7	1	6	No	No	Full Health insurance (including a top-up policy)	No	Stable and healthy housing	Needing social assistance	No	No	No	No	No	No	0	No	No	No	No	No	No	0	No	No	No	No	No	No	No
660	Selected	2007-10-21	female	2018-05-28	2	10.6	1	0	No	No	Full Health insurance (including a top-up policy)	No	Stable and healthy housing	Not needing a social assistance	No	No	No	No	No	No	0	No	No	No	No	No	No	0	No	No	No	No	No	No	No
661	Selected	2008-04-24	female	2018-05-28	2	10.1	1	0	No	No	Full Health insurance (including a top-up policy)	No	Stable and healthy housing	Not needing a social assistance	No	No	No	No	No	No	0	No	No	No	No	No	No	0	No	No	No	No	No	No	No
662	Selected	2008-08-22	male	2018-05-28	2	9.8	1	6	No	No	Full Health insurance (including a top-up policy)	No	Stable and healthy housing	Needing social assistance	No	No	No	No	No	No	0	No	No	No	No	No	No	0	No	No	No	No	No	No	No
663	Selected	2014-01-02	male	2018-05-28	2	4.4	1	0	No	No	Full Health insurance (including a top-up policy)	No	Stable and healthy housing	Not needing a social assistance	No	No	No	No	No	No	0	No	No	No	No	No	No	0	No	No	No	No	No	No	No
664	Selected	2006-12-07	male	2018-05-28	2	11.5	1	11	No	No	Full Health insurance (including a top-up policy)	No	Stable and healthy housing	Needing social assistance	Yes	No	No	No	No	No	0	No	No	No	No	No	No	0	No	No	No	No	No	No	No
665	Selected	2003-10-03	male	2018-05-28	2	14.7	1	10	No	No	Complete health insurance for deprived citizens	No	Stable and healthy housing	Needing social assistance	No	No	No	No	No	No	0	No	No	No	No	No	No	0	No	No	No	No	No	No	No
666	Selected	2010-05-29	female	2018-05-28	2	8	1	0	No	No	Full Health insurance (including a top-up policy)	No	Stable and healthy housing	Not needing a social assistance	No	No	No	No	No	No	0	No	No	No	No	No	No	0	No	No	No	No	No	No	No
667	Selected	2009-11-17	female	2018-05-29	2	8.5	1	0	No	No	Full Health insurance (including a top-up policy)	No	Stable and healthy housing	Not needing a social assistance	No	No	No	No	No	No	0	No	No	No	No	No	No	0	No	No	No	No	No	No	No
668	Selected	2006-04-20	male	2018-05-29	2	12.1	1	11	No	No	Full Health insurance (including a top-up policy)	No	Stable and healthy housing	Needing social assistance	Yes	No	No	No	No	No	0	No	No	No	No	No	No	1	No	No	No	No	No	Yes	No
669	Selected	2010-09-28	male	2018-05-30	2	7.7	1	0	No	No	Full Health insurance (including a top-up policy)	No	Stable and healthy housing	Not needing a social assistance	No	No	No	No	No	No	0	No	No	No	No	No	No	0	No	No	No	No	No	No	No
670	Selected	2010-03-08	female	2018-05-30	2	8.2	1	13	No	No	Full Health insurance (including a top-up policy)	No	Stable and healthy housing	Needing social assistance	Yes	No	No	No	Yes	No	0	No	No	No	No	No	No	0	No	No	No	No	No	No	No
671	Selected	2013-08-23	female	2018-05-30	2	4.8	1	25	No	No	Full Health insurance (including a top-up policy)	No	Unhealthy housing	Needing social assistance	No	No	No	No	Yes	No	2	No	Yes	No	No	Yes	No	2	No	No	No	Yes	No	Yes	Yes
672	Selected	2004-05-18	male	2018-05-30	2	14	1	0	No	No	Full Health insurance (including a top-up policy)	No	Stable and healthy housing	Not needing a social assistance	No	No	No	No	No	No	0	No	No	No	No	No	No	0	No	No	No	No	No	No	No
673	Selected	2005-10-10	male	2018-05-30	2	12.6	1	5	No	No	Full Health insurance (including a top-up policy)	No	Stable and healthy housing	Not needing a social assistance	Yes	No	No	No	No	No	0	No	No	No	No	No	No	0	No	No	No	No	No	No	No
674	Selected	2004-09-11	female	2018-06-05	2	13.7	1	6	No	No	Full Health insurance (including a top-up policy)	No	Stable and healthy housing	Needing social assistance	No	No	No	No	No	No	0	No	No	No	No	No	No	0	No	No	No	No	No	No	No
675	Selected	2013-05-14	male	2018-06-05	2	5.1	1	4	No	No	Complete health insurance for deprived citizens	No	Stable and healthy housing	Not needing a social assistance	No	No	No	No	No	No	1	No	Yes	No	No	No	No	0	No	No	No	No	No	No	No
676	Selected	2013-02-26	male	2018-06-06	2	5.3	1	24	No	No	Full Health insurance (including a top-up policy)	No	Unhealthy housing	Not needing a social assistance	Yes	No	No	No	Yes	No	0	No	No	No	No	No	No	1	No	No	No	Yes	No	No	No
677	Selected	2008-05-14	female	2018-06-12	2	10.1	1	11	No	No	Full Health insurance (including a top-up policy)	No	Stable and healthy housing	Needing social assistance	Yes	No	No	No	No	No	0	No	No	No	No	No	No	0	No	No	No	No	No	No	No
678	Selected	2008-10-05	male	2018-06-12	2	9.7	1	0	No	No	Full Health insurance (including a top-up policy)	No	Stable and healthy housing	Not needing a social assistance	No	No	No	No	No	No	0	No	No	No	No	No	No	0	No	No	No	No	No	No	No
679	Selected	2008-07-20	female	2018-06-12	2	9.9	1	0	No	No	Full Health insurance (including a top-up policy)	No	Stable and healthy housing	Not needing a social assistance	No	No	No	No	No	No	0	No	No	No	No	No	No	0	No	No	No	No	No	No	No
680	Selected	2014-10-26	male	2018-06-12	2	3.6	1	26	No	No	Full Health insurance (including a top-up policy)	No	Unhealthy housing	Not needing a social assistance	No	No	Yes	Yes	No	No	0	No	No	No	No	No	No	1	No	No	No	Yes	No	No	No
681	Selected	2009-03-12	female	2018-06-12	2	9.3	1	26	No	No	Full Health insurance (including a top-up policy)	No	Unhealthy housing	Not needing a social assistance	No	No	Yes	Yes	No	No	1	No	Yes	No	No	No	No	1	No	No	No	Yes	No	No	No
682	Selected	2014-03-24	male	2018-06-13	2	4.2	1	27	No	No	Full Health insurance (including a top-up policy)	No	Unstable housing (temporary social housing or housed by relatives, slums)	Needing social assistance	Yes	No	No	No	No	No	4	No	Yes	No	Yes	Yes	Yes	3	No	Yes	No	Yes	Yes	No	Yes
683	Selected	2006-01-17	male	2018-06-13	2	12.4	1	5	No	No	Full Health insurance (including a top-up policy)	No	Stable and healthy housing	Not needing a social assistance	Yes	No	No	No	No	No	0	No	No	No	No	No	No	0	No	No	No	No	No	No	No
684	Selected	2011-08-12	male	2018-06-13	2	6.8	1	5	No	No	Full Health insurance (including a top-up policy)	No	Stable and healthy housing	Not needing a social assistance	Yes	No	No	No	No	No	0	No	No	No	No	No	No	0	No	No	No	No	No	No	No
685	Selected	2011-02-07	female	2018-06-14	2	7.3	1	0	No	No	Full Health insurance (including a top-up policy)	No	Stable and healthy housing	Not needing a social assistance	No	No	No	No	No	No	0	No	No	No	No	No	No	0	No	No	No	No	No	No	No
686	Selected	2005-03-06	male	2018-06-14	2	13.3	1	15	No	No	Complete health insurance for deprived citizens	No	Stable and healthy housing	Needing social assistance	Yes	No	No	No	No	No	0	No	No	No	No	No	No	0	No	No	No	No	No	No	No
687	Selected	2015-04-28	female	2018-06-14	2	3.1	1	0	No	No	Full Health insurance (including a top-up policy)	No	Stable and healthy housing	Not needing a social assistance	No	No	No	No	No	No	2	No	Yes	No	No	No	Yes	1	No	No	No	Yes	No	No	No
688	Selected	2006-10-29	male	2018-06-14	2	11.6	1	2	No	No	Full Health insurance (including a top-up policy)	No	Stable and healthy housing	Not needing a social assistance	No	No	No	No	Yes	No	0	No	No	No	No	No	No	0	No	No	No	No	No	No	No
689	Selected	2011-01-19	female	2018-06-19	2	7.4	1	5	No	No	Full Health insurance (including a top-up policy)	No	Stable and healthy housing	Not needing a social assistance	Yes	No	No	No	No	No	0	No	No	No	No	No	No	0	No	No	No	No	No	No	No
690	Selected	2008-07-15	female	2018-06-19	2	9.9	1	0	No	No	Full Health insurance (including a top-up policy)	No	Stable and healthy housing	Not needing a social assistance	No	No	No	No	No	No	0	No	No	No	No	No	No	0	No	No	No	No	No	No	No
691	Selected	2011-05-16	male	2018-06-19	2	7.1	1	9	No	No	Full Health insurance (including a top-up policy)	No	Stable and healthy housing	Not needing a social assistance	No	No	Yes	No	No	No	1	No	No	No	No	No	Yes	0	No	No	No	No	No	No	No
692	Selected	2008-04-14	male	2018-06-25	2	10.2	1	0	No	No	Full Health insurance (including a top-up policy)	No	Stable and healthy housing	Not needing a social assistance	No	No	No	No	No	No	0	No	No	No	No	No	No	0	No	No	No	No	No	No	No
693	Selected	2008-12-12	female	2018-06-25	2	9.5	1	0	No	No	Full Health insurance (including a top-up policy)	No	Stable and healthy housing	Not needing a social assistance	No	No	No	No	No	No	0	No	No	No	No	No	No	0	No	No	No	No	No	No	No
694	Selected	2012-11-06	male	2018-06-25	2	5.6	1	0	No	No	Full Health insurance (including a top-up policy)	No	Stable and healthy housing	Not needing a social assistance	No	No	No	No	No	No	0	No	No	No	No	No	No	0	No	No	No	No	No	No	No
695	Selected	2006-04-29	male	2018-06-25	2	12.2	1	11	No	No	Full Health insurance (including a top-up policy)	No	Stable and healthy housing	Needing social assistance	Yes	No	No	Yes	No	No	0	No	No	No	No	No	No	0	No	No	No	No	No	No	No
696	Selected	2004-12-14	male	2018-06-27	2	13.5	1	0	No	No	Full Health insurance (including a top-up policy)	No	Stable and healthy housing	Not needing a social assistance	No	No	No	No	No	No	0	No	No	No	No	No	No	0	No	No	No	No	No	No	No
697	Selected	2014-06-26	female	2018-06-27	2	4	1	17	No	No	Incomplete health insurance	No	Stable and healthy housing	Not needing a social assistance	No	No	No	No	No	No	0	No	No	No	No	No	No	0	No	No	No	No	No	No	No
698	Selected	2007-09-05	male	2018-06-27	2	10.8	1	5	No	No	Full Health insurance (including a top-up policy)	No	Stable and healthy housing	Not needing a social assistance	Yes	No	No	No	No	No	0	No	No	No	No	No	No	0	No	No	No	No	No	No	No
699	Selected	2012-01-12	female	2018-07-03	2	6.5	1	0	No	No	Full Health insurance (including a top-up policy)	No	Stable and healthy housing	Not needing a social assistance	No	No	No	No	No	No	0	No	No	No	No	No	No	0	No	No	No	No	No	No	No
700	Selected	2008-03-31	female	2018-07-04	2	10.3	1	0	No	No	Full Health insurance (including a top-up policy)	No	Stable and healthy housing	Not needing a social assistance	No	No	No	No	No	No	0	No	No	No	No	No	No	0	No	No	No	No	No	No	No
701	Selected	2013-07-29	female	2018-07-04	2	4.9	1	0	No	No	Full Health insurance (including a top-up policy)	No	Stable and healthy housing	Not needing a social assistance	No	No	No	No	No	No	0	No	No	No	No	No	No	0	No	No	No	No	No	No	No
702	Selected	2012-12-26	female	2018-07-04	2	5.5	1	10	No	No	Complete health insurance for deprived citizens	No	Stable and healthy housing	Needing social assistance	No	No	No	Yes	No	No	0	No	No	No	No	No	No	0	No	No	No	No	No	No	No
703	Selected	2014-09-20	female	2018-07-10	2	3.8	1	0	No	No	Full Health insurance (including a top-up policy)	No	Stable and healthy housing	Not needing a social assistance	No	No	No	No	No	No	0	No	No	No	No	No	No	0	No	No	No	No	No	No	No
704	Selected	2009-02-07	female	2018-07-10	2	9.4	1	0	No	No	Full Health insurance (including a top-up policy)	No	Stable and healthy housing	Not needing a social assistance	No	No	No	No	No	No	0	No	No	No	No	No	No	0	No	No	No	No	No	No	No
705	Selected	2007-07-30	female	2018-07-10	2	10.9	1	2	No	No	Full Health insurance (including a top-up policy)	No	Stable and healthy housing	Not needing a social assistance	No	No	No	No	Yes	No	0	No	No	No	No	No	No	0	No	No	No	No	No	No	No
706	Selected	2009-07-24	male	2018-07-10	2	9	1	0	No	No	Full Health insurance (including a top-up policy)	No	Stable and healthy housing	Not needing a social assistance	No	No	No	No	No	No	0	No	No	No	No	No	No	0	No	No	No	No	No	No	No
707	Selected	2008-03-23	male	2018-07-11	2	10.3	1	5	No	No	Full Health insurance (including a top-up policy)	No	Stable and healthy housing	Not needing a social assistance	Yes	No	No	No	No	No	0	No	No	No	No	No	No	0	No	No	No	No	No	No	No
708	Selected	2003-09-03	female	2018-07-16	2	14.9	1	5	No	No	Full Health insurance (including a top-up policy)	No	Stable and healthy housing	Not needing a social assistance	Yes	No	No	No	No	No	0	No	No	No	No	No	No	0	No	No	No	No	No	No	No
709	Selected	2009-05-12	male	2018-07-16	2	9.2	1	4	No	No	Complete health insurance for deprived citizens	No	Stable and healthy housing	Not needing a social assistance	No	No	No	No	No	No	0	No	No	No	No	No	No	0	No	No	No	No	No	No	No
710	Selected	2014-04-13	male	2018-07-16	2	4.3	1	5	No	No	Full Health insurance (including a top-up policy)	No	Stable and healthy housing	Not needing a social assistance	Yes	No	No	No	No	No	0	No	No	No	No	No	No	0	No	No	No	No	No	No	No
711	Selected	2014-12-28	male	2018-07-16	2	3.5	1	11	No	No	Full Health insurance (including a top-up policy)	No	Stable and healthy housing	Needing social assistance	Yes	No	No	No	No	No	0	No	No	No	No	No	No	0	No	No	No	No	No	No	No
712	Selected	2010-10-18	male	2018-07-16	2	7.7	1	0	No	No	Full Health insurance (including a top-up policy)	No	Stable and healthy housing	Not needing a social assistance	No	No	No	No	No	No	0	No	No	No	No	No	No	0	No	No	No	No	No	No	No
713	Selected	2015-04-27	male	2018-07-16	2	3.2	1	4	No	No	Complete health insurance for deprived citizens	No	Stable and healthy housing	Not needing a social assistance	No	No	No	No	No	No	0	No	No	No	No	No	No	0	No	No	No	No	No	No	No
714	Selected	2005-01-06	male	2018-07-17	2	13.5	1	5	No	No	Full Health insurance (including a top-up policy)	No	Stable and healthy housing	Not needing a social assistance	Yes	No	No	No	No	No	0	No	No	No	No	No	No	0	No	No	No	No	No	No	No
715	Selected	2013-03-30	male	2018-07-17	2	5.3	1	0	No	No	Full Health insurance (including a top-up policy)	No	Stable and healthy housing	Not needing a social assistance	No	No	No	No	No	No	0	No	No	No	No	No	No	0	No	No	No	No	No	No	No
716	Selected	2007-06-24	male	2018-07-18	2	11.1	1	0	No	No	Full Health insurance (including a top-up policy)	No	Stable and healthy housing	Not needing a social assistance	No	No	No	No	No	No	0	No	No	No	No	No	No	0	No	No	No	No	No	No	No
717	Selected	2006-12-31	male	2018-07-25	2	11.6	1	0	No	No	Full Health insurance (including a top-up policy)	No	Stable and healthy housing	Not needing a social assistance	No	No	No	No	No	No	0	No	No	No	No	No	No	0	No	No	No	No	No	No	No
718	Selected	2008-08-04	male	2018-07-25	2	10	1	10	No	No	Complete health insurance for deprived citizens	No	Stable and healthy housing	Needing social assistance	No	No	No	No	No	No	0	No	No	No	No	No	No	0	No	No	No	No	No	No	No
719	Selected	2012-05-20	male	2018-07-25	2	6.2	1	0	No	No	Full Health insurance (including a top-up policy)	No	Stable and healthy housing	Not needing a social assistance	No	No	No	No	No	No	0	No	No	No	No	No	No	0	No	No	No	No	No	No	No
720	Selected	2015-06-26	male	2018-07-25	2	3.1	1	0	No	No	Full Health insurance (including a top-up policy)	No	Stable and healthy housing	Not needing a social assistance	No	No	No	No	No	No	0	No	No	No	No	No	No	0	No	No	No	No	No	No	No
721	Selected	2005-10-07	female	2018-07-30	2	12.8	1	0	No	No	Full Health insurance (including a top-up policy)	No	Stable and healthy housing	Not needing a social assistance	No	No	No	No	No	No	0	No	No	No	No	No	No	0	No	No	No	No	No	No	No
722	Selected	2015-03-20	male	2018-07-30	2	3.4	1	0	No	No	Full Health insurance (including a top-up policy)	No	Stable and healthy housing	Not needing a social assistance	No	No	No	No	No	No	0	No	No	No	No	No	No	0	No	No	No	No	No	No	No
723	Selected	2003-01-07	female	2018-07-30	2	15.6	1	0	No	No	Full Health insurance (including a top-up policy)	No	Stable and healthy housing	Not needing a social assistance	No	No	No	No	No	No	0	No	No	No	No	No	No	0	No	No	No	No	No	No	No
724	Selected	2013-03-09	female	2018-07-30	2	5.4	1	2	No	No	Full Health insurance (including a top-up policy)	No	Stable and healthy housing	Not needing a social assistance	No	No	No	No	Yes	No	0	No	No	No	No	No	No	0	No	No	No	No	No	No	No
725	Selected	2006-06-16	male	2018-07-31	2	12.1	1	13	No	No	Full Health insurance (including a top-up policy)	No	Stable and healthy housing	Needing social assistance	Yes	No	No	No	Yes	No	0	No	No	No	No	No	No	0	No	No	No	No	No	No	No
726	Selected	2010-01-09	male	2018-07-31	2	8.6	1	2	No	No	Full Health insurance (including a top-up policy)	No	Stable and healthy housing	Not needing a social assistance	No	No	No	No	Yes	No	0	No	No	No	No	No	No	0	No	No	No	No	No	No	No
727	Selected	2011-06-15	female	2018-08-03	2	7.1	1	0	No	No	Full Health insurance (including a top-up policy)	No	Stable and healthy housing	Not needing a social assistance	No	No	No	No	No	No	0	No	No	No	No	No	No	0	No	No	No	No	No	No	No
728	Selected	2015-05-28	male	2018-08-03	2	3.2	1	0	No	No	Full Health insurance (including a top-up policy)	No	Stable and healthy housing	Not needing a social assistance	No	No	No	No	No	No	0	No	No	No	No	No	No	0	No	No	No	No	No	No	No
729	Selected	2011-10-01	male	2018-08-03	2	6.8	1	0	No	No	Full Health insurance (including a top-up policy)	No	Stable and healthy housing	Not needing a social assistance	No	No	No	Yes	No	No	0	No	No	No	No	No	No	0	No	No	No	No	No	No	No
730	Selected	2013-05-17	female	2018-08-03	2	5.2	1	0	No	No	Full Health insurance (including a top-up policy)	No	Stable and healthy housing	Not needing a social assistance	No	No	No	No	No	No	0	No	No	No	No	No	No	0	No	No	No	No	No	No	No
731	Selected	2008-09-25	male	2018-08-07	2	9.9	1	0	No	No	Full Health insurance (including a top-up policy)	No	Stable and healthy housing	Not needing a social assistance	No	No	No	No	No	No	0	No	No	No	No	No	No	0	No	No	No	No	No	No	No
732	Selected	2011-05-27	male	2018-08-07	2	7.2	1	0	No	No	Full Health insurance (including a top-up policy)	No	Stable and healthy housing	Not needing a social assistance	No	No	No	No	No	No	0	No	No	No	No	No	No	0	No	No	No	No	No	No	No
733	Selected	2013-07-31	female	2018-08-07	2	5	1	73	No	Yes	Incomplete health insurance	Yes	Unstable housing (temporary social housing or housed by relatives, slums)	Needing social assistance without knowing how to get this	No	Yes	No	Yes	Yes	No	0	No	No	No	No	No	No	5	Yes	Yes	Yes	No	Yes	Yes	Yes
734	Selected	2010-11-30	female	2019-02-07	2	8.2	1	27	No	No	Complete health insurance for deprived citizens	No	Unhealthy housing	Needing social assistance	No	No	No	No	No	No	1	No	Yes	No	No	No	No	1	No	No	No	Yes	No	No	No
735	Selected	2013-02-15	female	2018-08-08	2	5.5	1	0	No	No	Full Health insurance (including a top-up policy)	No	Stable and healthy housing	Not needing a social assistance	No	No	No	No	No	No	0	No	No	No	No	No	No	0	No	No	No	No	No	No	No
736	Selected	2013-04-05	male	2018-08-08	2	5.3	1	0	No	No	Full Health insurance (including a top-up policy)	No	Stable and healthy housing	Not needing a social assistance	No	No	No	No	No	No	0	No	No	No	No	No	No	0	No	No	No	No	No	No	No
737	Selected	2015-07-22	male	2018-08-17	2	3.1	1	0	No	No	Full Health insurance (including a top-up policy)	No	Stable and healthy housing	Not needing a social assistance	No	No	No	No	No	No	0	No	No	No	No	No	No	0	No	No	No	No	No	No	No
738	Selected	2006-03-20	male	2018-08-17	2	12.4	1	0	No	No	Full Health insurance (including a top-up policy)	No	Stable and healthy housing	Not needing a social assistance	No	No	No	No	No	No	0	No	No	No	No	No	No	0	No	No	No	No	No	No	No
739	Selected	2015-04-24	male	2018-08-17	2	3.3	1	0	No	No	Full Health insurance (including a top-up policy)	No	Stable and healthy housing	Not needing a social assistance	No	No	No	No	No	No	0	No	No	No	No	No	No	0	No	No	No	No	No	No	No
740	Selected	2005-11-09	female	2018-08-17	2	12.8	1	0	No	No	Full Health insurance (including a top-up policy)	No	Stable and healthy housing	Not needing a social assistance	No	No	No	No	No	No	0	No	No	No	No	No	No	0	No	No	No	No	No	No	No
741	Selected	2009-01-08	female	2018-08-17	2	9.6	1	32	No	No	No health insurance (even if enrollment in progress or insurance abroad)	No	Stable and healthy housing	Needing social assistance	No	No	No	No	No	No	0	No	No	No	No	No	No	2	No	Yes	No	No	No	Yes	Yes
742	Selected	2015-08-18	male	2018-08-20	2	3	1	0	No	No	Full Health insurance (including a top-up policy)	No	Stable and healthy housing	Not needing a social assistance	No	No	No	Yes	No	No	0	No	No	No	No	No	No	0	No	No	No	No	No	No	No
743	Selected	2011-07-24	female	2018-08-20	2	7.1	1	0	No	No	Full Health insurance (including a top-up policy)	No	Stable and healthy housing	Not needing a social assistance	No	No	No	No	No	No	0	No	No	No	No	No	No	0	No	No	No	No	No	No	No
744	Selected	2008-12-30	male	2018-08-20	2	9.6	1	11	No	No	Full Health insurance (including a top-up policy)	No	Stable and healthy housing	Needing social assistance	Yes	No	No	No	No	No	0	No	No	No	No	No	No	0	No	No	No	No	No	No	No
745	Selected	2015-03-06	male	2018-08-20	2	3.5	1	5	No	No	Full Health insurance (including a top-up policy)	No	Stable and healthy housing	Not needing a social assistance	Yes	No	No	No	No	No	0	No	No	No	No	No	No	0	No	No	No	No	No	No	No
746	Selected	2011-11-16	male	2018-08-20	2	6.8	1	10	No	No	Complete health insurance for deprived citizens	No	Stable and healthy housing	Needing social assistance	No	No	No	No	No	No	0	No	No	No	No	No	No	0	No	No	No	No	No	No	No
747	Selected	2008-01-30	male	2018-08-22	2	10.6	1	11	No	No	Full Health insurance (including a top-up policy)	No	Stable and healthy housing	Needing social assistance	Yes	No	No	No	No	No	0	No	No	No	No	No	No	0	No	No	No	No	No	No	No
748	Selected	2010-03-01	female	2018-08-22	2	8.5	1	0	No	No	Full Health insurance (including a top-up policy)	No	Stable and healthy housing	Not needing a social assistance	No	No	No	No	No	No	0	No	No	No	No	No	No	0	No	No	No	No	No	No	No
749	Selected	2012-05-10	female	2018-08-22	2	6.3	1	0	No	No	Full Health insurance (including a top-up policy)	No	Stable and healthy housing	Not needing a social assistance	No	No	No	No	No	No	0	No	No	No	No	No	No	0	No	No	No	No	No	No	No
750	Selected	2010-09-06	female	2018-08-22	2	8	1	0	No	No	Full Health insurance (including a top-up policy)	No	Stable and healthy housing	Not needing a social assistance	No	No	No	No	No	No	0	No	No	No	No	No	No	0	No	No	No	No	No	No	No
751	Selected	2008-03-09	male	2018-08-29	2	10.5	1	19	No	Yes	Full Health insurance (including a top-up policy)	No	Stable and healthy housing	Not needing a social assistance	Yes	No	No	No	No	No	0	No	No	No	No	No	No	0	No	No	No	No	No	No	No
752	Selected	2012-12-17	female	2018-08-29	2	5.7	1	0	No	No	Full Health insurance (including a top-up policy)	No	Stable and healthy housing	Not needing a social assistance	No	No	No	No	No	No	0	No	No	No	No	No	No	0	No	No	No	No	No	No	No
753	Selected	2013-08-30	male	2018-08-29	2	5	1	0	No	No	Full Health insurance (including a top-up policy)	No	Stable and healthy housing	Not needing a social assistance	No	No	No	No	No	No	0	No	No	No	No	No	No	0	No	No	No	No	No	No	No
754	Selected	2015-01-29	female	2018-08-29	2	3.6	1	0	No	No	Full Health insurance (including a top-up policy)	No	Stable and healthy housing	Not needing a social assistance	No	No	No	No	No	No	0	No	No	No	No	No	No	0	No	No	No	No	No	No	No
755	Selected	2006-10-25	male	2018-09-04	2	11.9	1	10	No	No	Complete health insurance for deprived citizens	No	Stable and healthy housing	Needing social assistance	No	No	No	No	No	No	0	No	No	No	No	No	No	0	No	No	No	No	No	No	No
756	Selected	2006-09-23	female	2018-09-11	2	12	1	0	No	No	Full Health insurance (including a top-up policy)	No	Stable and healthy housing	Not needing a social assistance	No	No	No	Yes	No	No	0	No	No	No	No	No	No	0	No	No	No	No	No	No	No
757	Selected	2007-04-27	female	2018-09-11	2	11.4	1	6	No	No	Full Health insurance (including a top-up policy)	No	Stable and healthy housing	Needing social assistance	No	No	No	No	No	No	0	No	No	No	No	No	No	0	No	No	No	No	No	No	No
758	Selected	2008-09-18	male	2018-09-12	2	10	1	20	No	No	Full Health insurance (including a top-up policy)	No	Stable and healthy housing	Needing social assistance	Yes	No	Yes	No	No	No	0	No	No	No	No	No	No	0	No	No	No	No	No	No	No
759	Selected	2006-12-04	male	2018-09-12	2	11.8	1	0	No	No	Full Health insurance (including a top-up policy)	No	Stable and healthy housing	Not needing a social assistance	No	No	No	No	No	No	0	No	No	No	No	No	No	0	No	No	No	No	No	No	No
760	Selected	2005-03-03	male	2018-09-12	2	13.5	1	10	No	No	Complete health insurance for deprived citizens	No	Stable and healthy housing	Needing social assistance	No	No	No	No	No	No	0	No	No	No	No	No	No	0	No	No	No	No	No	No	No
761	Selected	2008-02-27	female	2018-09-12	2	10.5	1	0	No	No	Full Health insurance (including a top-up policy)	No	Stable and healthy housing	Not needing a social assistance	No	No	No	No	No	No	0	No	No	No	No	No	No	0	No	No	No	No	No	No	No
762	Selected	2005-03-28	female	2018-09-12	2	13.5	1	0	No	No	Full Health insurance (including a top-up policy)	No	Stable and healthy housing	Not needing a social assistance	No	No	No	No	No	No	0	No	No	No	No	No	No	0	No	No	No	No	No	No	No
763	Selected	2006-07-19	male	2018-09-17	2	12.2	1	0	No	No	Full Health insurance (including a top-up policy)	No	Stable and healthy housing	Not needing a social assistance	No	No	No	No	No	No	0	No	No	No	No	No	No	0	No	No	No	No	No	No	No
764	Selected	2009-09-15	female	2018-09-17	2	9	1	0	No	No	Full Health insurance (including a top-up policy)	No	Stable and healthy housing	Not needing a social assistance	No	No	No	No	No	No	0	No	No	No	No	No	No	0	No	No	No	No	No	No	No
765	Selected	2006-08-07	male	2018-09-17	2	12.1	1	0	No	No	Full Health insurance (including a top-up policy)	No	Stable and healthy housing	Not needing a social assistance	No	No	No	No	No	No	0	No	No	No	No	No	No	0	No	No	No	No	No	No	No
766	Selected	2013-06-14	female	2018-09-17	2	5.3	1	34	No	No	Complete health insurance for deprived citizens	No	Unhealthy housing	Needing social assistance	Yes	No	No	No	Yes	No	3	No	Yes	No	Yes	Yes	No	1	No	No	No	Yes	No	No	No
767	Selected	2014-01-25	female	2018-09-17	2	4.6	1	0	No	No	Full Health insurance (including a top-up policy)	No	Stable and healthy housing	Not needing a social assistance	No	No	No	No	No	No	0	No	No	No	No	No	No	0	No	No	No	No	No	No	No
768	Selected	2002-10-29	male	2018-09-17	2	15.9	1	0	No	No	Full Health insurance (including a top-up policy)	No	Stable and healthy housing	Not needing a social assistance	No	No	No	No	No	No	0	No	No	No	No	No	No	0	No	No	No	No	No	No	No
769	Selected	2009-07-04	male	2018-09-17	2	9.2	1	5	No	No	Full Health insurance (including a top-up policy)	No	Stable and healthy housing	Not needing a social assistance	Yes	No	No	No	No	No	0	No	No	No	No	No	No	0	No	No	No	No	No	No	No
770	Selected	2005-10-04	male	2018-09-18	2	13	1	22	No	No	Full Health insurance (including a top-up policy)	No	Unhealthy housing	Not needing a social assistance	Yes	No	No	No	No	No	3	No	Yes	No	Yes	Yes	No	2	No	Yes	No	Yes	No	No	Yes
771	Selected	2003-04-22	male	2018-09-18	2	15.4	1	0	No	No	Full Health insurance (including a top-up policy)	No	Stable and healthy housing	Not needing a social assistance	No	No	No	No	No	No	0	No	No	No	No	No	No	0	No	No	No	No	No	No	No
772	Selected	2015-09-03	male	2018-09-18	2	3	1	26	No	No	Full Health insurance (including a top-up policy)	No	Unhealthy housing	Not needing a social assistance	No	No	Yes	No	No	No	3	No	Yes	Yes	No	No	Yes	1	No	No	No	Yes	No	No	No
773	Selected	2011-02-15	male	2018-09-24	2	7.6	1	10	No	No	Complete health insurance for deprived citizens	No	Stable and healthy housing	Needing social assistance	No	No	No	No	No	No	0	No	No	No	No	No	No	0	No	No	No	No	No	No	No
774	Selected	2004-06-07	female	2018-09-24	2	14.3	1	0	No	No	Full Health insurance (including a top-up policy)	No	Stable and healthy housing	Not needing a social assistance	No	No	No	No	No	No	0	No	No	No	No	No	No	0	No	No	No	No	No	No	No
775	Selected	2015-04-01	female	2018-09-24	2	3.5	1	98	Yes	Yes	No health insurance (even if enrollment in progress or insurance abroad)	Yes	Unstable housing (temporary social housing or housed by relatives, slums)	Needing social assistance without knowing how to get this	Yes	No	Yes	Yes	Yes	Yes	6	Yes	Yes	Yes	Yes	Yes	Yes	4	No	Yes	Yes	No	Yes	Yes	Yes
776	Selected	2011-02-17	female	2018-09-24	2	7.6	1	61	No	Yes	Complete health insurance for deprived citizens	No	Homelessness	Needing social assistance	No	No	Yes	Yes	Yes	No	4	Yes	Yes	No	Yes	No	Yes	3	Yes	No	No	No	Yes	Yes	Yes
777	Selected	2015-03-23	female	2018-09-24	2	3.5	1	0	No	No	Full Health insurance (including a top-up policy)	No	Stable and healthy housing	Not needing a social assistance	No	No	No	No	No	No	0	No	No	No	No	No	No	0	No	No	No	No	No	No	No
778	Selected	2010-11-02	female	2018-09-24	2	7.9	1	15	No	No	Complete health insurance for deprived citizens	No	Stable and healthy housing	Needing social assistance	Yes	No	No	No	No	No	0	No	No	No	No	No	No	0	No	No	No	No	No	No	No
779	Selected	2013-11-09	male	2018-09-25	2	4.9	1	109	Yes	Yes	No health insurance (even if enrollment in progress or insurance abroad)	Yes	Homelessness	Needing social assistance without knowing how to get this	No	Yes	Yes	Yes	No	Yes	5	Yes	Yes	Yes	Yes	No	Yes	5	Yes	Yes	Yes	No	Yes	Yes	Yes
780	Selected	2008-08-21	male	2018-09-26	2	10.1	1	5	No	No	Full Health insurance (including a top-up policy)	No	Stable and healthy housing	Not needing a social assistance	Yes	No	No	No	No	No	0	No	No	No	No	No	No	0	No	No	No	No	No	No	No
781	Selected	2003-07-07	male	2018-09-26	2	15.2	1	4	No	No	Complete health insurance for deprived citizens	No	Stable and healthy housing	Not needing a social assistance	No	No	No	No	No	No	0	No	No	No	No	No	No	0	No	No	No	No	No	No	No
782	Selected	2003-12-15	female	2018-10-02	2	14.8	1	0	No	No	Full Health insurance (including a top-up policy)	No	Stable and healthy housing	Not needing a social assistance	No	No	No	No	No	No	0	No	No	No	No	No	No	0	No	No	No	No	No	No	No
783	Selected	2015-07-24	female	2018-10-02	2	3.2	1	15	No	No	Complete health insurance for deprived citizens	No	Stable and healthy housing	Needing social assistance	Yes	No	No	No	No	No	0	No	No	No	No	No	No	0	No	No	No	No	No	No	No
784	Selected	2003-05-09	female	2018-10-02	2	15.4	1	0	No	No	Full Health insurance (including a top-up policy)	No	Stable and healthy housing	Not needing a social assistance	No	No	No	No	No	No	0	No	No	No	No	No	No	0	No	No	No	No	No	No	No
785	Selected	2012-02-17	female	2018-10-08	2	6.6	1	0	No	No	Full Health insurance (including a top-up policy)	No	Stable and healthy housing	Not needing a social assistance	No	No	No	No	No	No	0	No	No	No	No	No	No	0	No	No	No	No	No	No	No
786	Selected	2004-08-11	male	2018-10-09	2	14.2	1	32	No	No	Complete health insurance for deprived citizens	No	Unhealthy housing	Needing social assistance	Yes	No	No	Yes	No	No	2	No	Yes	No	Yes	No	No	1	No	No	No	Yes	No	No	No
787	Selected	2004-06-15	female	2018-10-15	2	14.3	1	0	No	No	Full Health insurance (including a top-up policy)	No	Stable and healthy housing	Not needing a social assistance	No	No	No	No	No	No	0	No	No	No	No	No	No	0	No	No	No	No	No	No	No
788	Selected	2015-05-15	female	2018-10-15	2	3.4	1	39	No	No	Complete health insurance for deprived citizens	No	Unhealthy housing	Needing social assistance without knowing how to get this	No	No	Yes	No	No	No	2	No	Yes	No	No	No	Yes	1	No	No	No	Yes	No	No	No
789	Selected	2011-11-21	male	2018-10-15	2	6.9	1	0	No	No	Full Health insurance (including a top-up policy)	No	Stable and healthy housing	Not needing a social assistance	No	No	No	No	No	No	0	No	No	No	No	No	No	0	No	No	No	No	No	No	No
790	Selected	2008-05-30	male	2018-10-15	2	10.4	1	0	No	No	Full Health insurance (including a top-up policy)	No	Stable and healthy housing	Not needing a social assistance	No	No	No	No	No	No	0	No	No	No	No	No	No	0	No	No	No	No	No	No	No
791	Selected	2007-01-08	female	2018-10-15	2	11.8	1	0	No	No	Full Health insurance (including a top-up policy)	No	Stable and healthy housing	Not needing a social assistance	No	No	No	No	No	No	0	No	No	No	No	No	No	0	No	No	No	No	No	No	No
792	Selected	2007-07-12	female	2018-10-22	2	11.3	1	5	No	No	Full Health insurance (including a top-up policy)	No	Stable and healthy housing	Not needing a social assistance	Yes	No	No	No	No	No	0	No	No	No	No	No	No	0	No	No	No	No	No	No	No
793	Selected	2013-10-08	male	2018-10-22	2	5	1	27	No	No	Complete health insurance for deprived citizens	No	Unhealthy housing	Needing social assistance	No	No	No	No	No	No	0	No	No	No	No	No	No	1	No	No	No	Yes	No	No	No
794	Selected	2009-07-22	female	2018-10-29	2	9.3	1	0	No	No	Full Health insurance (including a top-up policy)	No	Stable and healthy housing	Not needing a social assistance	No	No	No	No	No	No	0	No	No	No	No	No	No	0	No	No	No	No	No	No	No
795	Selected	2013-07-04	female	2018-10-31	2	5.3	1	33	No	Yes	Complete health insurance for deprived citizens	Yes	Stable and healthy housing	Needing social assistance	No	No	No	No	Yes	No	5	Yes	No	Yes	Yes	Yes	Yes	4	No	Yes	Yes	No	Yes	Yes	Yes
796	Selected	2015-09-28	female	2018-11-05	2	3.1	1	5	No	No	Full Health insurance (including a top-up policy)	No	Stable and healthy housing	Not needing a social assistance	Yes	No	No	No	No	No	0	No	No	No	No	No	No	0	No	No	No	No	No	No	No
797	Selected	2012-11-10	female	2018-11-05	2	6	1	0	No	No	Full Health insurance (including a top-up policy)	No	Stable and healthy housing	Not needing a social assistance	No	No	No	No	No	No	0	No	No	No	No	No	No	0	No	No	No	No	No	No	No
798	Selected	2004-11-13	female	2018-11-05	2	14	1	0	No	No	Full Health insurance (including a top-up policy)	No	Stable and healthy housing	Not needing a social assistance	No	No	No	No	No	No	0	No	No	No	No	No	No	0	No	No	No	No	No	No	No
799	Selected	2012-06-01	female	2018-11-06	2	6.4	1	4	No	No	Complete health insurance for deprived citizens	No	Stable and healthy housing	Not needing a social assistance	No	No	No	No	No	No	0	No	No	No	No	No	No	0	No	No	No	No	No	No	No
800	Selected	2002-12-20	female	2018-11-06	2	15.9	1	0	No	No	Full Health insurance (including a top-up policy)	No	Stable and healthy housing	Not needing a social assistance	No	No	No	No	No	No	0	No	No	No	No	No	No	0	No	No	No	No	No	No	No
801	Selected	2005-12-02	male	2018-11-06	2	12.9	1	5	No	No	Full Health insurance (including a top-up policy)	No	Stable and healthy housing	Not needing a social assistance	Yes	No	No	No	No	No	0	No	No	No	No	No	No	0	No	No	No	No	No	No	No
802	Selected	2011-11-20	male	2018-11-06	2	7	1	0	No	No	Full Health insurance (including a top-up policy)	No	Stable and healthy housing	Not needing a social assistance	No	No	No	No	No	No	0	No	No	No	No	No	No	0	No	No	No	No	No	No	No
803	Selected	2010-04-06	male	2018-11-06	2	8.6	1	14	No	No	Complete health insurance for deprived citizens	No	Stable and healthy housing	Not needing a social assistance	No	Yes	No	No	Yes	No	0	No	No	No	No	No	No	0	No	No	No	No	No	No	No
804	Selected	2008-01-14	male	2018-11-06	2	10.8	1	0	No	No	Full Health insurance (including a top-up policy)	No	Stable and healthy housing	Not needing a social assistance	No	No	No	No	No	No	0	No	No	No	No	No	No	0	No	No	No	No	No	No	No
805	Selected	2006-05-13	female	2018-11-06	2	12.5	1	37	No	No	Complete health insurance for undocumented migrants	No	Stable and healthy housing	Needing social assistance	Yes	Yes	Yes	No	No	No	3	Yes	No	No	Yes	No	Yes	0	No	No	No	No	No	No	No
806	Selected	2014-01-18	male	2018-11-12	2	4.8	1	58	No	Yes	Complete health insurance for deprived citizens	No	Unstable housing (temporary social housing or housed by relatives, slums)	Needing social assistance without knowing how to get this	Yes	Yes	No	No	Yes	No	2	No	Yes	No	Yes	No	No	2	No	No	No	No	Yes	Yes	Yes
807	Selected	2015-05-13	female	2018-11-12	2	3.5	1	0	No	No	Full Health insurance (including a top-up policy)	No	Stable and healthy housing	Not needing a social assistance	No	No	No	No	No	No	0	No	No	No	No	No	No	0	No	No	No	No	No	No	No
808	Selected	2015-11-17	male	2018-11-12	2	3	1	0	No	No	Full Health insurance (including a top-up policy)	No	Stable and healthy housing	Not needing a social assistance	No	No	No	No	No	No	0	No	No	No	No	No	No	0	No	No	No	No	No	No	No
809	Selected	2014-12-17	female	2018-11-12	2	3.9	1	0	No	No	Full Health insurance (including a top-up policy)	No	Stable and healthy housing	Not needing a social assistance	No	No	No	No	No	No	0	No	No	No	No	No	No	0	No	No	No	No	No	No	No
810	Selected	2008-07-17	female	2018-11-15	2	10.3	1	0	No	No	Full Health insurance (including a top-up policy)	No	Stable and healthy housing	Not needing a social assistance	No	No	No	No	No	No	0	No	No	No	No	No	No	0	No	No	No	No	No	No	No
811	Selected	2014-07-13	male	2018-11-15	2	4.3	1	10	No	No	Complete health insurance for deprived citizens	No	Stable and healthy housing	Needing social assistance	No	No	No	No	No	No	0	No	No	No	No	No	No	0	No	No	No	No	No	No	No
812	Selected	2007-01-19	male	2018-11-15	2	11.8	1	0	No	No	Full Health insurance (including a top-up policy)	No	Stable and healthy housing	Not needing a social assistance	No	No	No	No	No	No	0	No	No	No	No	No	No	0	No	No	No	No	No	No	No
813	Selected	2007-05-01	female	2018-11-15	2	11.5	1	0	No	No	Full Health insurance (including a top-up policy)	No	Stable and healthy housing	Not needing a social assistance	No	No	No	No	No	No	0	No	No	No	No	No	No	0	No	No	No	No	No	No	No
814	Selected	2012-01-08	female	2018-11-15	2	6.9	1	10	No	No	Complete health insurance for deprived citizens	No	Stable and healthy housing	Needing social assistance	No	No	No	No	No	No	0	No	No	No	No	No	No	0	No	No	No	No	No	No	No
815	Selected	2014-07-13	female	2018-11-15	2	4.3	1	6	No	No	Full Health insurance (including a top-up policy)	No	Stable and healthy housing	Needing social assistance	No	No	No	No	No	No	0	No	No	No	No	No	No	0	No	No	No	No	No	No	No
816	Selected	2006-10-17	female	2018-11-15	2	12.1	1	0	No	No	Full Health insurance (including a top-up policy)	No	Stable and healthy housing	Not needing a social assistance	No	No	No	No	No	No	0	No	No	No	No	No	No	0	No	No	No	No	No	No	No
817	Selected	2013-02-22	female	2018-11-15	2	5.7	1	2	No	No	Full Health insurance (including a top-up policy)	No	Stable and healthy housing	Not needing a social assistance	No	No	No	No	Yes	No	0	No	No	No	No	No	No	0	No	No	No	No	No	No	No
818	Selected	2008-08-23	female	2018-11-16	2	10.2	1	7	No	No	Full Health insurance (including a top-up policy)	No	Stable and healthy housing	Not needing a social assistance	Yes	No	No	No	Yes	No	0	No	No	No	No	No	No	0	No	No	No	No	No	No	No
819	Selected	2007-07-08	female	2018-11-16	2	11.4	1	0	No	No	Full Health insurance (including a top-up policy)	No	Stable and healthy housing	Not needing a social assistance	No	No	No	No	No	No	0	No	No	No	No	No	No	0	No	No	No	No	No	No	No
820	Selected	2007-07-10	female	2018-11-16	2	11.4	1	6	No	No	Full Health insurance (including a top-up policy)	No	Stable and healthy housing	Needing social assistance	No	No	No	Yes	No	No	0	No	No	No	No	No	No	0	No	No	No	No	No	No	No
821	Selected	2013-01-22	male	2018-11-16	2	5.8	1	0	No	No	Full Health insurance (including a top-up policy)	No	Stable and healthy housing	Not needing a social assistance	No	No	No	No	No	No	0	No	No	No	No	No	No	0	No	No	No	No	No	No	No
822	Selected	2003-09-17	female	2018-11-19	2	15.2	1	15	No	No	Complete health insurance for deprived citizens	No	Stable and healthy housing	Needing social assistance	Yes	No	No	No	No	No	1	No	No	No	Yes	No	No	0	No	No	No	No	No	No	No
823	Selected	2004-06-15	female	2018-11-19	2	14.4	1	0	No	No	Full Health insurance (including a top-up policy)	No	Stable and healthy housing	Not needing a social assistance	No	No	No	No	No	No	0	No	No	No	No	No	No	0	No	No	No	No	No	No	No
824	Selected	2006-09-19	female	2018-11-19	2	12.2	1	11	No	No	Full Health insurance (including a top-up policy)	No	Stable and healthy housing	Needing social assistance	Yes	No	No	No	No	No	0	No	No	No	No	No	No	0	No	No	No	No	No	No	No
825	Selected	2010-08-03	female	2018-11-19	2	8.3	1	0	No	No	Full Health insurance (including a top-up policy)	No	Stable and healthy housing	Not needing a social assistance	No	No	No	No	No	No	0	No	No	No	No	No	No	0	No	No	No	No	No	No	No
826	Selected	2012-07-04	male	2018-11-19	2	6.4	1	0	No	No	Full Health insurance (including a top-up policy)	No	Stable and healthy housing	Not needing a social assistance	No	No	No	No	No	No	0	No	No	No	No	No	No	0	No	No	No	No	No	No	No
827	Selected	2006-02-06	female	2018-11-20	2	12.8	1	0	No	No	Full Health insurance (including a top-up policy)	No	Stable and healthy housing	Not needing a social assistance	No	No	No	No	No	No	0	No	No	No	No	No	No	0	No	No	No	No	No	No	No
828	Selected	2006-04-06	male	2018-11-20	2	12.6	1	0	No	No	Full Health insurance (including a top-up policy)	No	Stable and healthy housing	Not needing a social assistance	No	No	No	No	No	No	0	No	No	No	No	No	No	0	No	No	No	No	No	No	No
829	Selected	2008-04-20	female	2018-11-20	2	10.6	1	5	No	No	Full Health insurance (including a top-up policy)	No	Stable and healthy housing	Not needing a social assistance	Yes	No	No	No	No	No	0	No	No	No	No	No	No	0	No	No	No	No	No	No	No
830	Selected	2013-09-22	female	2018-11-20	2	5.2	1	0	No	No	Full Health insurance (including a top-up policy)	No	Stable and healthy housing	Not needing a social assistance	No	No	No	No	No	No	0	No	No	No	No	No	No	0	No	No	No	No	No	No	No
831	Selected	2009-03-07	male	2018-11-20	2	9.7	1	0	No	No	Full Health insurance (including a top-up policy)	No	Stable and healthy housing	Not needing a social assistance	No	No	No	No	No	No	0	No	No	No	No	No	No	0	No	No	No	No	No	No	No
832	Selected	2008-12-11	female	2018-11-21	2	9.9	1	0	No	No	Full Health insurance (including a top-up policy)	No	Stable and healthy housing	Not needing a social assistance	No	No	No	No	No	No	0	No	No	No	No	No	No	0	No	No	No	No	No	No	No
833	Selected	2005-04-19	female	2018-11-22	2	13.6	1	0	No	No	Full Health insurance (including a top-up policy)	No	Stable and healthy housing	Not needing a social assistance	No	No	No	No	No	No	0	No	No	No	No	No	No	0	No	No	No	No	No	No	No
834	Selected	2008-07-21	female	2018-11-22	2	10.3	1	0	No	No	Full Health insurance (including a top-up policy)	No	Stable and healthy housing	Not needing a social assistance	No	No	No	No	No	No	0	No	No	No	No	No	No	0	No	No	No	No	No	No	No
835	Selected	2010-01-30	female	2018-11-22	2	8.8	1	0	No	No	Full Health insurance (including a top-up policy)	No	Stable and healthy housing	Not needing a social assistance	No	No	No	No	No	No	0	No	No	No	No	No	No	0	No	No	No	No	No	No	No
836	Selected	2013-09-23	female	2018-11-26	2	5.2	1	0	No	No	Full Health insurance (including a top-up policy)	No	Stable and healthy housing	Not needing a social assistance	No	No	No	No	No	No	0	No	No	No	No	No	No	0	No	No	No	No	No	No	No
837	Selected	2015-05-20	female	2018-11-26	2	3.5	1	17	No	No	Full Health insurance (including a top-up policy)	No	Unhealthy housing	Not needing a social assistance	No	No	No	No	No	No	0	No	No	No	No	No	No	0	No	No	No	No	No	No	No
838	Selected	2012-03-30	male	2018-11-26	2	6.7	1	116	Yes	Yes	No health insurance (even if enrollment in progress or insurance abroad)	Yes	Homelessness	Needing social assistance without knowing how to get this	Yes	Yes	Yes	Yes	Yes	Yes	6	Yes	Yes	Yes	Yes	Yes	Yes	6	Yes	Yes	Yes	Yes	Yes	Yes	Yes
839	Selected	2014-07-08	female	2018-11-27	2	4.4	1	0	No	No	Full Health insurance (including a top-up policy)	No	Stable and healthy housing	Not needing a social assistance	No	No	No	No	No	No	0	No	No	No	No	No	No	0	No	No	No	No	No	No	No
840	Selected	2009-06-04	male	2018-11-27	2	9.5	1	0	No	No	Full Health insurance (including a top-up policy)	No	Stable and healthy housing	Not needing a social assistance	No	No	No	No	No	No	0	No	No	No	No	No	No	0	No	No	No	No	No	No	No
841	Selected	2011-01-19	female	2018-11-27	2	7.9	1	5	No	No	Full Health insurance (including a top-up policy)	No	Stable and healthy housing	Not needing a social assistance	Yes	No	No	No	No	No	0	No	No	No	No	No	No	0	No	No	No	No	No	No	No
842	Selected	2009-09-30	female	2018-11-27	2	9.2	1	0	No	No	Full Health insurance (including a top-up policy)	No	Stable and healthy housing	Not needing a social assistance	No	No	No	No	No	No	0	No	No	No	No	No	No	0	No	No	No	No	No	No	No
843	Selected	2010-12-18	female	2018-11-28	2	7.9	1	5	No	No	Full Health insurance (including a top-up policy)	No	Stable and healthy housing	Not needing a social assistance	Yes	No	No	No	No	No	0	No	No	No	No	No	No	0	No	No	No	No	No	No	No
844	Selected	2008-12-29	female	2018-11-29	2	9.9	1	6	No	No	Full Health insurance (including a top-up policy)	No	Stable and healthy housing	Needing social assistance	No	No	No	No	No	No	0	No	No	No	No	No	No	0	No	No	No	No	No	No	No
845	Selected	2009-01-10	male	2018-11-29	2	9.9	1	21	Yes	No	Complete health insurance for deprived citizens	No	Stable and healthy housing	Needing social assistance without knowing how to get this	No	No	No	Yes	No	No	0	No	No	No	No	No	No	0	No	No	No	No	No	No	No
846	Selected	2014-06-29	male	2018-11-29	2	4.4	1	0	No	No	Full Health insurance (including a top-up policy)	No	Stable and healthy housing	Not needing a social assistance	No	No	No	No	No	No	0	No	No	No	No	No	No	0	No	No	No	No	No	No	No
847	Selected	2009-12-14	male	2018-11-29	2	9	1	5	No	No	Full Health insurance (including a top-up policy)	No	Stable and healthy housing	Not needing a social assistance	Yes	No	No	No	No	No	0	No	No	No	No	No	No	0	No	No	No	No	No	No	No
848	Selected	2004-07-01	male	2018-12-04	2	14.4	1	0	No	No	Full Health insurance (including a top-up policy)	No	Stable and healthy housing	Not needing a social assistance	No	No	No	No	No	No	0	No	No	No	No	No	No	0	No	No	No	No	No	No	No
849	Selected	2004-07-04	male	2018-12-04	2	14.4	1	0	No	No	Full Health insurance (including a top-up policy)	No	Stable and healthy housing	Not needing a social assistance	No	No	No	No	No	No	0	No	No	No	No	No	No	0	No	No	No	No	No	No	No
850	Selected	2008-09-05	male	2018-12-04	2	10.2	1	0	No	No	Full Health insurance (including a top-up policy)	No	Stable and healthy housing	Not needing a social assistance	No	No	No	No	No	No	0	No	No	No	No	No	No	0	No	No	No	No	No	No	No
851	Selected	2014-10-05	female	2018-12-05	2	4.2	1	2	No	No	Full Health insurance (including a top-up policy)	No	Stable and healthy housing	Not needing a social assistance	No	No	No	No	Yes	No	0	No	No	No	No	No	No	0	No	No	No	No	No	No	No
852	Selected	2007-09-12	female	2018-12-05	2	11.2	1	0	No	No	Full Health insurance (including a top-up policy)	No	Stable and healthy housing	Not needing a social assistance	No	No	No	No	No	No	0	No	No	No	No	No	No	0	No	No	No	No	No	No	No
853	Selected	2003-11-29	male	2018-12-05	2	15	1	28	No	No	Incomplete health insurance	No	Stable and healthy housing	Not needing a social assistance	No	No	Yes	Yes	Yes	No	2	Yes	No	No	Yes	No	No	2	No	Yes	No	No	No	Yes	Yes
854	Selected	2007-08-25	male	2018-12-06	2	11.3	1	93	No	Yes	No health insurance (even if enrollment in progress or insurance abroad)	Yes	Unstable housing (temporary social housing or housed by relatives, slums)	Needing social assistance without knowing how to get this	No	Yes	Yes	Yes	Yes	Yes	0	No	No	No	No	No	No	4	No	Yes	Yes	No	Yes	Yes	Yes
855	Selected	2009-01-27	male	2018-12-06	2	9.9	1	0	No	No	Full Health insurance (including a top-up policy)	No	Stable and healthy housing	Not needing a social assistance	No	No	No	No	No	No	0	No	No	No	No	No	No	0	No	No	No	No	No	No	No
856	Selected	2006-08-31	female	2018-12-06	2	12.3	1	0	No	No	Full Health insurance (including a top-up policy)	No	Stable and healthy housing	Not needing a social assistance	No	No	No	No	No	No	0	No	No	No	No	No	No	0	No	No	No	No	No	No	No
857	Selected	2012-08-16	male	2018-12-10	2	6.3	1	0	No	No	Full Health insurance (including a top-up policy)	No	Stable and healthy housing	Not needing a social assistance	No	No	No	No	No	No	0	No	No	No	No	No	No	0	No	No	No	No	No	No	No
858	Selected	2012-01-06	male	2018-12-10	2	6.9	1	0	No	No	Full Health insurance (including a top-up policy)	No	Stable and healthy housing	Not needing a social assistance	No	No	No	No	No	No	0	No	No	No	No	No	No	0	No	No	No	No	No	No	No
859	Selected	2007-05-26	male	2018-12-10	2	11.5	1	0	No	No	Full Health insurance (including a top-up policy)	No	Stable and healthy housing	Not needing a social assistance	No	No	No	No	No	No	0	No	No	No	No	No	No	0	No	No	No	No	No	No	No
860	Selected	2011-03-28	male	2018-12-10	2	7.7	1	0	No	No	Full Health insurance (including a top-up policy)	No	Stable and healthy housing	Not needing a social assistance	No	No	No	No	No	No	0	No	No	No	No	No	No	0	No	No	No	No	No	No	No
861	Selected	2012-05-29	male	2018-12-10	2	6.5	1	0	No	No	Full Health insurance (including a top-up policy)	No	Stable and healthy housing	Not needing a social assistance	No	No	No	No	No	No	0	No	No	No	No	No	No	0	No	No	No	No	No	No	No
862	Selected	2015-11-17	female	2018-12-11	2	3.1	1	0	No	No	Full Health insurance (including a top-up policy)	No	Stable and healthy housing	Not needing a social assistance	No	No	No	No	No	No	0	No	No	No	No	No	No	0	No	No	No	No	No	No	No
863	Selected	2011-05-22	male	2018-12-11	2	7.6	1	0	No	No	Full Health insurance (including a top-up policy)	No	Stable and healthy housing	Not needing a social assistance	No	No	No	No	No	No	0	No	No	No	No	No	No	0	No	No	No	No	No	No	No
864	Selected	2011-05-21	female	2018-12-11	2	7.6	1	5	No	No	Full Health insurance (including a top-up policy)	No	Stable and healthy housing	Not needing a social assistance	Yes	No	No	No	No	No	0	No	No	No	No	No	No	0	No	No	No	No	No	No	No
865	Selected	2012-08-18	male	2018-12-11	2	6.3	1	111	Yes	Yes	No health insurance (even if enrollment in progress or insurance abroad)	Yes	Homelessness	Needing social assistance without knowing how to get this	No	Yes	Yes	Yes	Yes	Yes	5	Yes	Yes	Yes	Yes	No	Yes	6	Yes	Yes	Yes	Yes	Yes	Yes	Yes
866	Selected	2012-06-28	female	2018-12-12	2	6.5	1	2	No	No	Full Health insurance (including a top-up policy)	No	Stable and healthy housing	Not needing a social assistance	No	No	No	No	Yes	No	0	No	No	No	No	No	No	0	No	No	No	No	No	No	No
867	Selected	2005-09-22	male	2018-12-12	2	13.2	1	0	No	No	Full Health insurance (including a top-up policy)	No	Stable and healthy housing	Not needing a social assistance	No	No	No	No	No	No	0	No	No	No	No	No	No	0	No	No	No	No	No	No	No
868	Selected	2012-09-30	female	2018-12-12	2	6.2	1	0	No	No	Full Health insurance (including a top-up policy)	No	Stable and healthy housing	Not needing a social assistance	No	No	No	No	No	No	0	No	No	No	No	No	No	0	No	No	No	No	No	No	No
869	Selected	2005-07-06	male	2018-12-12	2	13.4	1	5	No	No	Full Health insurance (including a top-up policy)	No	Stable and healthy housing	Not needing a social assistance	Yes	No	No	No	No	No	0	No	No	No	No	No	No	0	No	No	No	No	No	No	No
870	Selected	2015-04-03	male	2018-12-12	2	3.7	1	0	No	No	Full Health insurance (including a top-up policy)	No	Stable and healthy housing	Not needing a social assistance	No	No	No	No	No	No	0	No	No	No	No	No	No	0	No	No	No	No	No	No	No
871	Selected	2007-12-22	female	2018-11-21	2	10.9	1	82	Yes	Yes	No health insurance (even if enrollment in progress or insurance abroad)	No	Unstable housing (temporary social housing or housed by relatives, slums)	Needing social assistance without knowing how to get this	No	No	Yes	Yes	No	No	3	Yes	Yes	No	Yes	No	No	5	Yes	Yes	Yes	No	Yes	Yes	Yes
872	Selected	2010-03-28	female	2018-12-13	2	8.7	1	0	No	No	Full Health insurance (including a top-up policy)	No	Stable and healthy housing	Not needing a social assistance	No	No	No	No	No	No	0	No	No	No	No	No	No	0	No	No	No	No	No	No	No
873	Selected	2013-09-15	female	2018-12-20	2	5.3	1	0	No	No	Full Health insurance (including a top-up policy)	No	Stable and healthy housing	Not needing a social assistance	No	No	No	No	No	No	0	No	No	No	No	No	No	0	No	No	No	No	No	No	No
874	Selected	2012-10-26	female	2018-12-20	2	6.1	1	0	No	No	Full Health insurance (including a top-up policy)	No	Stable and healthy housing	Not needing a social assistance	No	No	No	No	No	No	0	No	No	No	No	No	No	0	No	No	No	No	No	No	No
875	Selected	2014-01-09	male	2018-12-20	2	4.9	1	0	No	No	Full Health insurance (including a top-up policy)	No	Stable and healthy housing	Not needing a social assistance	No	No	No	No	No	No	0	No	No	No	No	No	No	0	No	No	No	No	No	No	No
876	Selected	2014-02-25	male	2018-12-20	2	4.8	1	0	No	No	Full Health insurance (including a top-up policy)	No	Stable and healthy housing	Not needing a social assistance	No	No	No	No	No	No	0	No	No	No	No	No	No	0	No	No	No	No	No	No	No
877	Selected	2014-09-23	male	2018-12-20	2	4.2	1	4	No	No	Complete health insurance for deprived citizens	No	Stable and healthy housing	Not needing a social assistance	No	No	No	No	No	No	0	No	No	No	No	No	No	0	No	No	No	No	No	No	No
878	Selected	2010-03-09	female	2018-12-20	2	8.8	1	5	No	No	Full Health insurance (including a top-up policy)	No	Stable and healthy housing	Not needing a social assistance	Yes	No	No	No	No	No	0	No	No	No	No	No	No	0	No	No	No	No	No	No	No
879	Selected	2013-02-23	female	2018-12-24	2	5.8	1	4	No	No	Complete health insurance for deprived citizens	No	Stable and healthy housing	Not needing a social assistance	No	No	No	No	No	No	0	No	No	No	No	No	No	0	No	No	No	No	No	No	No
880	Selected	2006-10-11	male	2018-12-24	2	12.2	1	5	No	No	Full Health insurance (including a top-up policy)	No	Stable and healthy housing	Not needing a social assistance	Yes	No	No	No	No	No	0	No	No	No	No	No	No	0	No	No	No	No	No	No	No
881	Selected	2015-01-09	female	2018-12-24	2	4	1	0	No	No	Full Health insurance (including a top-up policy)	No	Stable and healthy housing	Not needing a social assistance	No	No	No	No	No	No	0	No	No	No	No	No	No	0	No	No	No	No	No	No	No
882	Selected	2010-09-03	female	2018-12-24	2	8.3	1	0	No	No	Full Health insurance (including a top-up policy)	No	Stable and healthy housing	Not needing a social assistance	No	No	No	No	No	No	0	No	No	No	No	No	No	0	No	No	No	No	No	No	No
883	Selected	2014-03-04	male	2018-12-26	2	4.8	1	96	Yes	Yes	No health insurance (even if enrollment in progress or insurance abroad)	Yes	Unstable housing (temporary social housing or housed by relatives, slums)	Needing social assistance	No	Yes	Yes	Yes	Yes	No	5	Yes	Yes	Yes	Yes	No	Yes	6	Yes	Yes	Yes	Yes	Yes	Yes	Yes
884	Selected	2011-04-13	female	2018-12-27	2	7.7	1	0	No	No	Full Health insurance (including a top-up policy)	No	Stable and healthy housing	Not needing a social assistance	No	No	No	Yes	No	No	0	No	No	No	No	No	No	0	No	No	No	No	No	No	No
885	Selected	2012-04-13	female	2018-12-27	2	6.7	1	0	No	No	Full Health insurance (including a top-up policy)	No	Stable and healthy housing	Not needing a social assistance	No	No	No	No	No	No	0	No	No	No	No	No	No	0	No	No	No	No	No	No	No
886	Selected	2014-08-29	male	2019-01-03	2	4.3	1	36	No	No	Full Health insurance (including a top-up policy)	No	Unhealthy housing	Not needing a social assistance	No	Yes	Yes	No	No	Yes	1	No	Yes	No	No	No	No	1	No	No	No	Yes	No	No	No
887	Selected	2012-06-04	female	2019-01-04	2	6.6	1	0	No	No	Full Health insurance (including a top-up policy)	No	Stable and healthy housing	Not needing a social assistance	No	No	No	No	No	No	0	No	No	No	No	No	No	0	No	No	No	No	No	No	No
888	Selected	2011-03-14	male	2019-01-07	2	7.8	1	0	No	No	Full Health insurance (including a top-up policy)	No	Stable and healthy housing	Not needing a social assistance	No	No	No	No	No	No	0	No	No	No	No	No	No	0	No	No	No	No	No	No	No
889	Selected	2008-01-14	male	2019-01-07	2	11	1	27	No	No	Full Health insurance (including a top-up policy)	No	Unstable housing (temporary social housing or housed by relatives, slums)	Needing social assistance	Yes	No	No	No	No	No	4	No	Yes	Yes	Yes	Yes	No	0	No	No	No	No	No	No	No
890	Selected	2011-02-26	female	2019-03-14	2	8	1	0	No	No	Full Health insurance (including a top-up policy)	No	Stable and healthy housing	Not needing a social assistance	No	No	No	No	No	No	0	No	No	No	No	No	No	0	No	No	No	No	No	No	No	2019-09-02	5.65092	No	No	Full Health insurance (including a top-up policy)	No	Stable and healthy housing	Not needing a social assistance	No	No	No	No	No	No
891	Selected	2012-05-27	male	2019-03-15	2	6.8	1	0	No	No	Full Health insurance (including a top-up policy)	No	Stable and healthy housing	Not needing a social assistance	No	No	No	No	No	No	0	No	No	No	No	No	No	0	No	No	No	No	No	No	No
892	Selected	2005-05-04	female	2019-03-15	2	13.9	1	0	No	No	Full Health insurance (including a top-up policy)	No	Stable and healthy housing	Not needing a social assistance	No	No	No	No	No	No	0	No	No	No	No	No	No	0	No	No	No	No	No	No	No
893	Selected	2011-12-23	male	2019-03-15	2	7.2	1	0	No	No	Full Health insurance (including a top-up policy)	No	Stable and healthy housing	Not needing a social assistance	No	No	No	No	No	No	0	No	No	No	No	No	No	0	No	No	No	No	No	No	No
894	Selected	2014-07-12	male	2019-03-18	2	4.7	1	0	No	No	Full Health insurance (including a top-up policy)	No	Stable and healthy housing	Not needing a social assistance	No	No	No	No	No	No	0	No	No	No	No	No	No	0	No	No	No	No	No	No	No
895	Selected	2009-09-04	male	2019-03-18	2	9.5	1	0	No	No	Full Health insurance (including a top-up policy)	No	Stable and healthy housing	Not needing a social assistance	No	No	No	No	No	No	0	No	No	No	No	No	No	0	No	No	No	No	No	No	No
896	Selected	2003-12-26	male	2019-03-18	2	15.2	1	0	No	No	Full Health insurance (including a top-up policy)	No	Stable and healthy housing	Not needing a social assistance	No	No	No	No	No	No	0	No	No	No	No	No	No	0	No	No	No	No	No	No	No	2019-09-03	5.55236	No	No	Full Health insurance (including a top-up policy)	No	Stable and healthy housing	Not needing a social assistance	No	Yes	No	Yes	No	No
897	Selected	2007-08-25	female	2019-03-18	2	11.6	1	5	No	No	Full Health insurance (including a top-up policy)	No	Stable and healthy housing	Not needing a social assistance	Yes	No	No	No	No	No	0	No	No	No	No	No	No	0	No	No	No	No	No	No	No
898	Selected	2006-11-24	male	2019-03-18	2	12.3	1	0	No	No	Full Health insurance (including a top-up policy)	No	Stable and healthy housing	Not needing a social assistance	No	No	No	No	No	No	0	No	No	No	No	No	No	0	No	No	No	No	No	No	No	2019-09-04	5.58522	No	No	Full Health insurance (including a top-up policy)	No	Stable and healthy housing	Not needing a social assistance	No	No	No	No	No	No
899	Selected	2004-08-24	male	2019-03-18	2	14.6	1	5	No	No	Full Health insurance (including a top-up policy)	No	Stable and healthy housing	Not needing a social assistance	Yes	No	No	No	No	No	0	No	No	No	No	No	No	0	No	No	No	No	No	No	No	2019-09-02	5.51951	No	No	Full Health insurance (including a top-up policy)	No	Stable and healthy housing	Not needing a social assistance	No	Yes	No	No	No	No
900	Selected	2008-12-08	male	2019-03-25	2	10.3	1	0	No	No	Full Health insurance (including a top-up policy)	No	Stable and healthy housing	Not needing a social assistance	No	No	No	No	No	No	0	No	No	No	No	No	No	0	No	No	No	No	No	No	No	2019-10-14	6.66941	No	No	Full Health insurance (including a top-up policy)	No	Stable and healthy housing	Not needing a social assistance	No	No	Yes	No	No	No
901	Selected	2008-05-03	male	2019-03-26	2	10.9	1	10	No	No	Complete health insurance for deprived citizens	No	Stable and healthy housing	Needing social assistance	No	No	No	No	No	No	0	No	No	No	No	No	No	0	No	No	No	No	No	No	No
902	Selected	2009-09-08	female	2019-03-26	2	9.5	1	0	No	No	Full Health insurance (including a top-up policy)	No	Stable and healthy housing	Not needing a social assistance	No	No	No	No	No	No	0	No	No	No	No	No	No	0	No	No	No	No	No	No	No
903	Selected	2009-07-01	female	2019-03-27	2	9.7	1	0	No	No	Full Health insurance (including a top-up policy)	No	Stable and healthy housing	Not needing a social assistance	No	No	No	No	No	No	0	No	No	No	No	No	No	0	No	No	No	No	No	No	No
904	Selected	2012-04-22	male	2019-03-27	2	6.9	1	17	No	No	Full Health insurance (including a top-up policy)	No	Unhealthy housing	Not needing a social assistance	No	No	No	No	No	No	1	No	Yes	No	No	No	No	1	No	No	No	Yes	No	No	No	2019-09-03	5.25667	No	No	Full Health insurance (including a top-up policy)	No	Stable and healthy housing	3	No	No	Yes	No	No	No
905	Selected	2014-11-10	female	2019-03-27	2	4.4	1	0	No	No	Full Health insurance (including a top-up policy)	No	Stable and healthy housing	Not needing a social assistance	No	No	No	No	No	No	0	No	No	No	No	No	No	0	No	No	No	No	No	No	No
906	Selected	2012-10-23	female	2019-03-27	2	6.4	1	0	No	No	Full Health insurance (including a top-up policy)	No	Stable and healthy housing	Not needing a social assistance	No	No	No	No	No	No	0	No	No	No	No	No	No	0	No	No	No	No	No	No	No
907	Selected	2005-09-28	male	2019-04-01	2	13.5	1	0	No	No	Full Health insurance (including a top-up policy)	No	Stable and healthy housing	Not needing a social assistance	No	No	No	No	No	No	0	No	No	No	No	No	No	0	No	No	No	No	No	No	No
908	Selected	2013-12-03	male	2019-04-01	2	5.3	1	74	Yes	Yes	No health insurance (even if enrollment in progress or insurance abroad)	Yes	Stable and healthy housing	Needing social assistance without knowing how to get this	No	Yes	No	No	Yes	No	4	Yes	No	Yes	Yes	No	Yes	5	Yes	Yes	Yes	No	Yes	Yes	Yes
909	Selected	2005-06-20	male	2019-04-01	2	13.8	1	0	No	No	Full Health insurance (including a top-up policy)	No	Stable and healthy housing	Not needing a social assistance	No	No	No	No	No	No	0	No	No	No	No	No	No	0	No	No	No	No	No	No	No
910	Selected	2010-09-12	male	2019-04-02	2	8.6	1	0	No	No	Full Health insurance (including a top-up policy)	No	Stable and healthy housing	Not needing a social assistance	No	No	No	No	No	No	0	No	No	No	No	No	No	0	No	No	No	No	No	No	No	2019-09-04	5.0924	No	No	Full Health insurance (including a top-up policy)	No	Stable and healthy housing	Not needing a social assistance	No	No	No	No	No	No
911	Selected	2008-08-13	female	2019-04-02	2	10.6	1	0	No	No	Full Health insurance (including a top-up policy)	No	Stable and healthy housing	Not needing a social assistance	No	No	No	No	No	No	0	No	No	No	No	No	No	0	No	No	No	No	No	No	No	2019-09-03	5.05955	No	No	Full Health insurance (including a top-up policy)	No	Stable and healthy housing	Not needing a social assistance	No	No	No	Yes	No	No
912	Selected	2015-07-15	male	2019-04-02	2	3.7	1	0	No	No	Full Health insurance (including a top-up policy)	No	Stable and healthy housing	Not needing a social assistance	No	No	No	No	No	No	0	No	No	No	No	No	No	0	No	No	No	No	No	No	No
913	Selected	2006-10-03	female	2019-04-02	2	12.5	1	0	No	No	Full Health insurance (including a top-up policy)	No	Stable and healthy housing	Not needing a social assistance	No	No	No	No	No	No	0	No	No	No	No	No	No	0	No	No	No	No	No	No	No
914	Selected	2014-11-13	male	2019-04-02	2	4.4	1	0	No	No	Full Health insurance (including a top-up policy)	No	Stable and healthy housing	Not needing a social assistance	No	No	No	No	No	No	0	No	No	No	No	No	No	0	No	No	No	No	No	No	No
915	Selected	2013-10-22	male	2019-04-02	2	5.4	1	0	No	No	Full Health insurance (including a top-up policy)	No	Stable and healthy housing	Not needing a social assistance	No	No	No	No	No	No	0	No	No	No	No	No	No	0	No	No	No	No	No	No	No
916	Selected	2006-11-03	female	2019-04-02	2	12.4	1	0	No	No	Full Health insurance (including a top-up policy)	No	Stable and healthy housing	Not needing a social assistance	No	No	No	No	No	No	0	No	No	No	No	No	No	0	No	No	No	No	No	No	No
917	Selected	2014-09-07	male	2019-04-02	2	4.6	1	0	No	No	Full Health insurance (including a top-up policy)	No	Stable and healthy housing	Not needing a social assistance	No	No	No	No	No	No	0	No	No	No	No	No	No	0	No	No	No	No	No	No	No
918	Selected	2009-11-17	male	2019-04-02	2	9.4	1	0	No	No	Full Health insurance (including a top-up policy)	No	Stable and healthy housing	Not needing a social assistance	No	No	No	No	No	No	0	No	No	No	No	No	No	0	No	No	No	No	No	No	No	2019-10-11	6.30801	No	No	Full Health insurance (including a top-up policy)	No	Stable and healthy housing	Not needing a social assistance	No	No	No	No	No	No
919	Selected	2011-07-07	female	2019-04-02	2	7.7	1	14	No	Yes	Full Health insurance (including a top-up policy)	No	Stable and healthy housing	Not needing a social assistance	No	No	No	No	No	No	0	No	No	No	No	No	No	0	No	No	No	No	No	No	No	2019-09-06	5.15811	No	No	Full Health insurance (including a top-up policy)	No	Stable and healthy housing	Not needing a social assistance	No	No	No	No	No	No
920	Selected	2010-07-28	female	2019-04-08	2	8.7	1	0	No	No	Full Health insurance (including a top-up policy)	No	Stable and healthy housing	Not needing a social assistance	No	No	No	No	No	No	0	No	No	No	No	No	No	0	No	No	No	No	No	No	No	2019-10-11	6.11088	No	No	Full Health insurance (including a top-up policy)	No	Stable and healthy housing	Not needing a social assistance	No	No	No	No	No	No
921	Selected	2005-05-25	male	2019-04-08	2	13.9	1	40	No	Yes	No health insurance (even if enrollment in progress or insurance abroad)	No	Stable and healthy housing	Not needing a social assistance	No	No	No	No	No	No	1	Yes	No	No	No	No	No	3	Yes	Yes	Yes	No	No	No	Yes
922	Selected	2007-08-14	male	2019-04-08	2	11.6	1	12	No	No	Complete health insurance for deprived citizens	No	Stable and healthy housing	Needing social assistance	No	No	No	No	Yes	No	0	No	No	No	No	No	No	0	No	No	No	No	No	No	No
923	Selected	2006-07-25	male	2019-04-08	2	12.7	1	0	No	No	Full Health insurance (including a top-up policy)	No	Stable and healthy housing	Not needing a social assistance	No	No	No	No	No	No	0	No	No	No	No	No	No	0	No	No	No	No	No	No	No
924	Selected	2010-10-17	male	2019-04-08	2	8.5	1	5	No	No	Full Health insurance (including a top-up policy)	No	Stable and healthy housing	Not needing a social assistance	Yes	No	No	No	No	No	0	No	No	No	No	No	No	0	No	No	No	No	No	No	No
925	Selected	2005-10-27	female	2019-04-08	2	13.4	1	5	No	No	Full Health insurance (including a top-up policy)	No	Stable and healthy housing	Not needing a social assistance	Yes	No	No	No	No	No	1	No	No	No	No	Yes	No	0	No	No	No	No	No	No	No	2019-10-08	6.01232	No	No	Full Health insurance (including a top-up policy)	No	Stable and healthy housing	Not needing a social assistance	No	Yes	No	No	No	No
926	Selected	2016-02-21	female	2019-04-09	2	3.1	1	6	No	No	Full Health insurance (including a top-up policy)	No	Stable and healthy housing	Needing social assistance	No	No	No	No	No	No	0	No	No	No	No	No	No	0	No	No	No	No	No	No	No
927	Selected	2013-07-24	male	2019-04-09	2	5.7	1	0	No	No	Full Health insurance (including a top-up policy)	No	Stable and healthy housing	Not needing a social assistance	No	No	No	No	No	No	0	No	No	No	No	No	No	0	No	No	No	No	No	No	No
928	Selected	2004-06-28	male	2019-04-09	2	14.8	1	5	No	No	Full Health insurance (including a top-up policy)	No	Stable and healthy housing	Not needing a social assistance	Yes	No	No	No	No	No	0	No	No	No	No	No	No	0	No	No	No	No	No	No	No	2019-10-09	6.01232	No	No	Full Health insurance (including a top-up policy)	No	Stable and healthy housing	Not needing a social assistance	Yes	Yes	No	No	No	No
929	Selected	2016-04-25	female	2019-04-10	2	3	1	104	Yes	Yes	No health insurance (even if enrollment in progress or insurance abroad)	No	Homelessness	Needing social assistance without knowing how to get this	No	Yes	Yes	No	Yes	Yes	4	Yes	Yes	No	Yes	No	Yes	6	Yes	Yes	Yes	Yes	Yes	Yes	Yes
930	Selected	2014-12-18	male	2019-04-15	2	4.3	1	0	No	No	Full Health insurance (including a top-up policy)	No	Stable and healthy housing	Not needing a social assistance	No	No	No	No	No	No	0	No	No	No	No	No	No	0	No	No	No	No	No	No	No
931	Selected	2015-12-14	male	2019-04-15	2	3.3	1	26	No	No	Complete health insurance for deprived citizens	No	Unhealthy housing	Not needing a social assistance	Yes	No	No	No	No	No	1	No	Yes	No	No	No	No	0	No	No	No	No	No	No	No
932	Selected	2012-03-15	female	2019-04-15	2	7.1	1	0	No	No	Full Health insurance (including a top-up policy)	No	Stable and healthy housing	Not needing a social assistance	No	No	No	No	No	No	0	No	No	No	No	No	No	0	No	No	No	No	No	No	No
933	Selected	2007-02-26	male	2019-04-24	2	12.2	1	0	No	No	Full Health insurance (including a top-up policy)	No	Stable and healthy housing	Not needing a social assistance	No	No	No	No	No	No	0	No	No	No	No	No	No	0	No	No	No	No	No	No	No
934	Selected	2011-10-25	female	2019-04-24	2	7.5	1	0	No	No	Full Health insurance (including a top-up policy)	No	Stable and healthy housing	Not needing a social assistance	No	No	No	Yes	No	No	0	No	No	No	No	No	No	0	No	No	No	No	No	No	No
935	Selected	2009-07-16	female	2019-04-24	2	9.8	1	0	No	No	Full Health insurance (including a top-up policy)	No	Stable and healthy housing	Not needing a social assistance	No	No	No	No	No	No	0	No	No	No	No	No	No	0	No	No	No	No	No	No	No
936	Selected	2007-07-24	female	2019-04-24	2	11.8	1	15	No	No	Complete health insurance for deprived citizens	No	Stable and healthy housing	Needing social assistance	Yes	No	No	No	No	No	0	No	No	No	No	No	No	0	No	No	No	No	No	No	No	2019-11-05	6.40657	No	No	Complete health insurance for deprived citizens	No	Stable and healthy housing	Needing social assistance	No	Yes	No	No	No	No
937	Selected	2011-08-25	female	2019-04-24	2	7.7	1	0	No	No	Full Health insurance (including a top-up policy)	No	Stable and healthy housing	Not needing a social assistance	No	No	No	No	No	No	0	No	No	No	No	No	No	0	No	No	No	No	No	No	No
938	Selected	2003-06-09	male	2019-04-24	2	15.9	1	0	No	No	Full Health insurance (including a top-up policy)	No	Stable and healthy housing	Not needing a social assistance	No	No	No	No	No	No	0	No	No	No	No	No	No	0	No	No	No	No	No	No	No
939	Selected	2005-08-26	male	2019-04-25	2	13.7	1	0	No	No	Full Health insurance (including a top-up policy)	No	Stable and healthy housing	Not needing a social assistance	No	No	No	No	No	No	0	No	No	No	No	No	No	0	No	No	No	No	No	No	No
940	Selected	2011-11-09	male	2019-04-25	2	7.5	1	5	No	No	Full Health insurance (including a top-up policy)	No	Stable and healthy housing	Not needing a social assistance	Yes	No	No	No	No	No	0	No	No	No	No	No	No	0	No	No	No	No	No	No	No
941	Selected	2007-08-08	male	2019-04-30	2	11.7	1	0	No	No	Full Health insurance (including a top-up policy)	No	Stable and healthy housing	Not needing a social assistance	No	No	No	No	No	No	0	No	No	No	No	No	No	0	No	No	No	No	No	No	No
942	Selected	2008-09-05	male	2019-05-06	2	10.7	1	5	No	No	Full Health insurance (including a top-up policy)	No	Stable and healthy housing	Not needing a social assistance	Yes	No	No	No	No	No	0	No	No	No	No	No	No	0	No	No	No	No	No	No	No
943	Selected	2013-01-23	male	2019-05-06	2	6.3	1	0	No	No	Full Health insurance (including a top-up policy)	No	Stable and healthy housing	Not needing a social assistance	No	No	No	No	No	No	0	No	No	No	No	No	No	0	No	No	No	No	No	No	No
944	Selected	2008-02-13	male	2019-05-06	2	11.2	1	0	No	No	Full Health insurance (including a top-up policy)	No	Stable and healthy housing	Not needing a social assistance	No	No	No	No	No	No	0	No	No	No	No	No	No	0	No	No	No	No	No	No	No
945	Selected	2007-06-09	male	2019-05-06	2	11.9	1	15	No	No	Complete health insurance for deprived citizens	No	Stable and healthy housing	Needing social assistance	Yes	No	No	No	No	No	0	No	No	No	No	No	No	0	No	No	No	No	No	No	No
946	Selected	2007-11-12	male	2019-05-06	2	11.5	1	10	No	No	Complete health insurance for deprived citizens	No	Stable and healthy housing	Needing social assistance	No	No	No	No	No	No	0	No	No	No	No	No	No	0	No	No	No	No	No	No	No
947	Selected	2013-06-26	female	2019-05-07	2	5.9	1	15	No	No	Complete health insurance for deprived citizens	No	Stable and healthy housing	Needing social assistance	Yes	No	No	No	No	No	0	No	No	No	No	No	No	0	No	No	No	No	No	No	No
948	Selected	2014-04-15	female	2019-05-07	2	5.1	1	82	Yes	Yes	No health insurance (even if enrollment in progress or insurance abroad)	No	Unstable housing (temporary social housing or housed by relatives, slums)	Needing social assistance	No	Yes	No	No	Yes	Yes	4	Yes	Yes	No	Yes	No	Yes	5	Yes	Yes	Yes	No	Yes	Yes	Yes
949	Selected	2007-03-29	male	2019-05-07	2	12.1	1	5	No	No	Full Health insurance (including a top-up policy)	No	Stable and healthy housing	Not needing a social assistance	Yes	No	No	No	No	No	0	No	No	No	No	No	No	0	No	No	No	No	No	No	No
950	Selected	2007-06-16	female	2019-05-07	2	11.9	1	0	No	No	Full Health insurance (including a top-up policy)	No	Stable and healthy housing	Not needing a social assistance	No	No	No	No	No	No	0	No	No	No	No	No	No	0	No	No	No	No	No	No	No
951	Selected	2014-12-06	female	2019-05-07	2	4.4	1	0	No	No	Full Health insurance (including a top-up policy)	No	Stable and healthy housing	Not needing a social assistance	No	No	No	No	No	No	0	No	No	No	No	No	No	0	No	No	No	No	No	No	No
952	Selected	2008-07-24	male	2019-05-07	2	10.8	1	0	No	No	Full Health insurance (including a top-up policy)	No	Stable and healthy housing	Not needing a social assistance	No	No	No	No	No	No	0	No	No	No	No	No	No	0	No	No	No	No	No	No	No
953	Selected	2012-05-15	male	2019-05-07	2	7	1	0	No	No	Full Health insurance (including a top-up policy)	No	Stable and healthy housing	Not needing a social assistance	No	No	No	No	No	No	0	No	No	No	No	No	No	0	No	No	No	No	No	No	No
954	Selected	2010-06-14	male	2019-05-07	2	8.9	1	28	No	No	Full Health insurance (including a top-up policy)	No	Unhealthy housing	Needing social assistance	Yes	No	No	No	No	No	0	No	No	No	No	No	No	0	No	No	No	No	No	No	No
955	Selected	2011-05-23	female	2019-05-13	2	8	1	10	No	No	Complete health insurance for deprived citizens	No	Stable and healthy housing	Needing social assistance	No	No	No	No	No	No	0	No	No	No	No	No	No	0	No	No	No	No	No	No	No
956	Selected	2006-08-08	male	2019-05-13	2	12.8	1	28	No	No	Incomplete health insurance	No	Stable and healthy housing	Needing social assistance	Yes	No	No	No	No	No	0	No	No	No	No	No	No	0	No	No	No	No	No	No	No
957	Selected	2010-12-20	female	2019-05-13	2	8.4	1	0	No	No	Full Health insurance (including a top-up policy)	No	Stable and healthy housing	Not needing a social assistance	No	No	No	No	No	No	0	No	No	No	No	No	No	0	No	No	No	No	No	No	No
958	Selected	2013-06-02	male	2019-05-13	2	5.9	1	0	No	No	Full Health insurance (including a top-up policy)	No	Stable and healthy housing	Not needing a social assistance	No	No	No	No	No	No	0	No	No	No	No	No	No	0	No	No	No	No	No	No	No
959	Selected	2014-04-28	female	2019-05-13	2	5	1	4	No	No	Complete health insurance for deprived citizens	No	Stable and healthy housing	Not needing a social assistance	No	No	No	No	No	No	0	No	No	No	No	No	No	0	No	No	No	No	No	No	No
960	Selected	2005-08-03	female	2019-05-14	2	13.8	1	0	No	No	Full Health insurance (including a top-up policy)	No	Stable and healthy housing	Not needing a social assistance	No	No	No	No	No	No	0	No	No	No	No	No	No	1	No	No	No	No	Yes	No	No
961	Selected	2012-05-10	female	2019-05-14	2	7	1	0	No	No	Full Health insurance (including a top-up policy)	No	Stable and healthy housing	Not needing a social assistance	No	No	No	No	No	No	0	No	No	No	No	No	No	0	No	No	No	No	No	No	No
962	Selected	2014-03-28	female	2019-05-14	2	5.1	1	0	No	No	Full Health insurance (including a top-up policy)	No	Stable and healthy housing	Not needing a social assistance	No	No	No	No	No	No	0	No	No	No	No	No	No	0	No	No	No	No	No	No	No
963	Selected	2012-05-15	male	2019-05-14	2	7	1	4	No	No	Complete health insurance for deprived citizens	No	Stable and healthy housing	Not needing a social assistance	No	No	No	No	No	No	0	No	No	No	No	No	No	0	No	No	No	No	No	No	No
964	Selected	2014-05-16	female	2019-05-14	2	5	1	0	No	No	Full Health insurance (including a top-up policy)	No	Stable and healthy housing	Not needing a social assistance	No	No	No	No	No	No	0	No	No	No	No	No	No	0	No	No	No	No	No	No	No
965	Selected	2013-07-07	male	2019-05-15	2	5.9	1	32	No	No	Complete health insurance for deprived citizens	No	Unhealthy housing	Needing social assistance	Yes	No	No	No	No	No	1	No	Yes	No	No	No	No	1	No	No	No	Yes	No	No	No
966	Selected	2013-11-16	male	2019-05-15	2	5.5	1	0	No	No	Full Health insurance (including a top-up policy)	No	Stable and healthy housing	Not needing a social assistance	No	No	No	No	No	No	0	No	No	No	No	No	No	0	No	No	No	No	No	No	No
967	Selected	2007-10-25	male	2019-05-15	2	11.6	1	0	No	No	Full Health insurance (including a top-up policy)	No	Stable and healthy housing	Not needing a social assistance	No	No	No	No	No	No	0	No	No	No	No	No	No	0	No	No	No	No	No	No	No
968	Selected	2015-04-11	female	2019-05-20	2	4.1	1	11	No	No	Full Health insurance (including a top-up policy)	No	Stable and healthy housing	Needing social assistance	Yes	No	No	No	No	No	0	No	No	No	No	No	No	0	No	No	No	No	No	No	No
969	Selected	2009-08-12	male	2019-05-20	2	9.8	1	0	No	No	Full Health insurance (including a top-up policy)	No	Stable and healthy housing	Not needing a social assistance	No	No	No	No	No	No	0	No	No	No	No	No	No	0	No	No	No	No	No	No	No
970	Selected	2007-05-16	male	2019-05-20	2	12	1	5	No	No	Full Health insurance (including a top-up policy)	No	Stable and healthy housing	Not needing a social assistance	Yes	No	No	No	No	No	0	No	No	No	No	No	No	0	No	No	No	No	No	No	No
971	Selected	2008-09-23	male	2019-05-20	2	10.7	1	0	No	No	Full Health insurance (including a top-up policy)	No	Stable and healthy housing	Not needing a social assistance	No	No	No	No	No	No	0	No	No	No	No	No	No	0	No	No	No	No	No	No	No
972	Selected	2004-07-26	female	2019-05-20	2	14.8	1	0	No	No	Full Health insurance (including a top-up policy)	No	Stable and healthy housing	Not needing a social assistance	No	No	No	No	No	No	0	No	No	No	No	No	No	0	No	No	No	No	No	No	No
973	Selected	2014-05-22	female	2019-05-20	2	5	1	0	No	No	Full Health insurance (including a top-up policy)	No	Stable and healthy housing	Not needing a social assistance	No	No	No	No	No	No	0	No	No	No	No	No	No	0	No	No	No	No	No	No	No
974	Selected	2008-03-05	female	2019-05-20	2	11.2	1	5	No	No	Full Health insurance (including a top-up policy)	No	Stable and healthy housing	Not needing a social assistance	Yes	No	No	No	No	No	0	No	No	No	No	No	No	0	No	No	No	No	No	No	No
975	Selected	2011-08-30	male	2019-05-20	2	7.7	1	0	No	No	Full Health insurance (including a top-up policy)	No	Stable and healthy housing	Not needing a social assistance	No	No	No	No	No	No	0	No	No	No	No	No	No	0	No	No	No	No	No	No	No
976	Selected	2014-07-13	female	2019-05-20	2	4.9	1	4	No	No	Complete health insurance for deprived citizens	No	Stable and healthy housing	Not needing a social assistance	No	No	No	No	No	No	0	No	No	No	No	No	No	0	No	No	No	No	No	No	No
977	Selected	2004-04-04	female	2019-05-21	2	15.1	1	2	No	No	Full Health insurance (including a top-up policy)	No	Stable and healthy housing	Not needing a social assistance	No	No	No	No	Yes	No	0	No	No	No	No	No	No	0	No	No	No	No	No	No	No
978	Selected	2014-11-29	male	2019-05-21	2	4.5	1	5	No	No	Full Health insurance (including a top-up policy)	No	Stable and healthy housing	Not needing a social assistance	Yes	No	No	No	No	No	0	No	No	No	No	No	No	0	No	No	No	No	No	No	No
979	Selected	2010-12-03	female	2019-05-21	2	8.5	1	28	No	No	Full Health insurance (including a top-up policy)	No	Unhealthy housing	Needing social assistance	Yes	No	No	No	No	No	0	No	No	No	No	No	No	1	No	No	No	Yes	No	No	No
980	Selected	2006-03-16	female	2019-05-21	2	13.2	1	0	No	No	Full Health insurance (including a top-up policy)	No	Stable and healthy housing	Not needing a social assistance	No	No	No	No	No	No	0	No	No	No	No	No	No	0	No	No	No	No	No	No	No
981	Selected	2015-04-09	male	2019-05-21	2	4.1	1	0	No	No	Full Health insurance (including a top-up policy)	No	Stable and healthy housing	Not needing a social assistance	No	No	No	No	No	No	0	No	No	No	No	No	No	0	No	No	No	No	No	No	No
982	Selected	2012-12-18	male	2019-05-27	2	6.4	1	17	No	No	Full Health insurance (including a top-up policy)	No	Unhealthy housing	Not needing a social assistance	No	No	No	No	No	No	0	No	No	No	No	No	No	1	No	No	No	Yes	No	No	No
983	Selected	2009-07-31	female	2019-05-27	2	9.8	1	0	No	No	Full Health insurance (including a top-up policy)	No	Stable and healthy housing	Not needing a social assistance	No	No	No	No	No	No	0	No	No	No	No	No	No	0	No	No	No	No	No	No	No
984	Selected	2008-12-27	female	2019-05-27	2	10.4	1	0	No	No	Full Health insurance (including a top-up policy)	No	Stable and healthy housing	Not needing a social assistance	No	No	No	No	No	No	0	No	No	No	No	No	No	0	No	No	No	No	No	No	No
985	Selected	2012-11-12	female	2019-05-27	2	6.5	1	0	No	No	Full Health insurance (including a top-up policy)	No	Stable and healthy housing	Not needing a social assistance	No	No	No	No	No	No	0	No	No	No	No	No	No	0	No	No	No	No	No	No	No
986	Not Selected	2008-01-16	male	2019-05-27	2	11.4	0		No	No	Complete health insurance for deprived citizens	No	Stable and healthy housing	Not needing a social assistance	Yes		No	No	No	No	0	No	No	No	No	No	No	0	No	No	No	No	No	No	No
987	Selected	2009-09-19	male	2019-05-27	2	9.7	1	0	No	No	Full Health insurance (including a top-up policy)	No	Stable and healthy housing	Not needing a social assistance	No	No	No	No	No	No	0	No	No	No	No	No	No	0	No	No	No	No	No	No	No
988	Selected	2012-01-21	male	2019-05-28	2	7.3	1	0	No	No	Full Health insurance (including a top-up policy)	No	Stable and healthy housing	Not needing a social assistance	No	No	No	No	No	No	0	No	No	No	No	No	No	0	No	No	No	No	No	No	No
989	Selected	2015-02-13	female	2019-05-28	2	4.3	1	0	No	No	Full Health insurance (including a top-up policy)	No	Stable and healthy housing	Not needing a social assistance	No	No	No	No	No	No	0	No	No	No	No	No	No	0	No	No	No	No	No	No	No
990	Selected	2007-10-20	female	2019-05-28	2	11.6	1	0	No	No	Full Health insurance (including a top-up policy)	No	Stable and healthy housing	Not needing a social assistance	No	No	No	No	No	No	0	No	No	No	No	No	No	0	No	No	No	No	No	No	No
[truncated: 2 more columns]
